# Supplementary material for: Covalent bidentate ligand-enabled regioselective Wacker-type oxidation of olefins
Source: Royal Society of Chemistry journal article supplement (doi:10.1039/d4ra07296k), 2024-01-01

## Supporting Information

### Covalent Bidentate Ligand-Enabled Regioselective Wacker-type Oxidation of Olefins

*Liping Chen<sup>b</sup>, Shuai Zhang<sup>a</sup>, Yuchen Yang<sup>a</sup>, Xue Wang<sup>a</sup>, Wenjie Lan<sup>a</sup>, Zhijie Chen<sup>a</sup>,  
wang Gong<sup>a</sup>, qingqing Nie<sup>a</sup>, Wenqiang Cao<sup>a</sup>, <sup>†</sup>and Ziyang Meng<sup>a\*</sup>*

<sup>a</sup> Ganzhou polytechnic college, Ganzhou, 341000, Jiangxi province, China

<sup>b</sup> Ganzhou People's Hospital, Ganzhou, 341000, Jiangxi province, China

\*Corresponding author. Email: [mengzy0724@163.com](mailto:mengzy0724@163.com)

## Table of Contents

|                                                                                                  |     |
|--------------------------------------------------------------------------------------------------|-----|
| 1. General Information.....                                                                      | S3  |
| 2. Experimental Section.....                                                                     | S3  |
| 2.1 Ligands Preparation.....                                                                     | S3  |
| 2.2 General Procedures for Ketone.....                                                           | S4  |
| 3. Characterization Data.....                                                                    | S5  |
| 4. Mechanistic Study.....                                                                        | S13 |
| 4.1 Preparation of Intermediates.....                                                            | S13 |
| 4.2 <b>1a</b> Leading to Products <b>2a</b> using <b>IN1</b> or <b>IN2</b> .....                 | S15 |
| 4.3 <b>1a</b> leading to products <b>2a</b> with <b>IN1</b> and extra Pd(OAc) <sub>2</sub> ..... | S15 |
| 4.4 <b>1a</b> leading to products <b>2a</b> with <b>IN2</b> and extra Pd(OAc).....               | S16 |
| 5. References.....                                                                               | S16 |
| 6. NMR Spectra.....                                                                              | S17 |

## 1. General Information

Catalytic reactions were carried out in Schlenk tubes using pre-dried glassware. Various ligands were synthesized according to previously described procedures. Commercially available reagents were purchased from Energy Chemical, Bidepharm, Sigma Aldrich, Alfa Aesar, Acros or TCI, and used without purification unless otherwise noted. Column chromatography purification was performed using 200–300 mesh silica gel. NMR spectra were mostly recorded for  $^1\text{H}$  NMR at 500 MHz and for  $^{13}\text{C}$  NMR at 125 MHz.  $\text{CDCl}_3$  and  $\text{DMSO-D}_6$  were used as solvents. Chemical shifts were referenced relative to residual solvent signal ( $\text{CDCl}_3$ :  $^1\text{H}$  NMR:  $\delta$  7.26 ppm,  $^{13}\text{C}$  NMR:  $\delta$  77.16 ppm;  $\text{DMSO-D}_6$ :  $^1\text{H}$  NMR:  $\delta$  2.50 ppm,  $^{13}\text{C}$  NMR:  $\delta$  39.52 ppm). The following abbreviations are used to describe peak patterns where appropriate: br = broad, s = singlet, d = doublet, t = triplet, q = quartet, m = multiplet. Coupling constants ( $J$ ) are reported in Hertz (Hz). HRMS was performed on Agilent Technologies 6224 TOF LC/MS apparatus (ESI).

## 2. Experimental Section

### 2.1 Ligands Preparation

#### 2.1.1 Preparation of 1-(pyridin-2-yl)-1*H*-indazole (L1)<sup>1</sup>

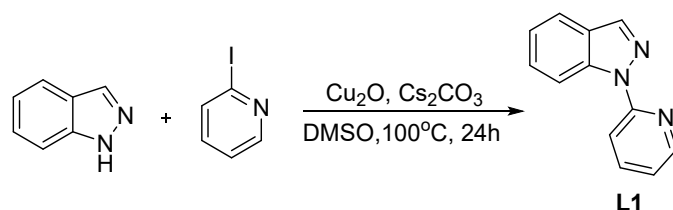

A reaction tube (10 mL) with magnetic stir bar was charged with 1*H*-indazole (118 mg, 1.0 mmol),  $\text{Cu}_2\text{O}$  (143 mg, 1.0 mmol),  $\text{Cs}_2\text{CO}_3$  (750 mg, 2.0 mmol), and 2-iodopyridine (306 mg, 1.5 mmol). Then 1 mL  $\text{DMSO}$  was added to the reaction tube. The reaction system was stirred at  $100^\circ\text{C}$  oil bath for 24h. After cooling to room temperature, the mixture was diluted with dichloromethane and filtered through a pad of celite. The combined organic extracts were dried over anhydrous  $\text{Na}_2\text{SO}_4$  and the solvent was removed under reduced pressure. The residue was purified by silica gel column chromatography (PET: EtOAc = 15:1) to afford **L1** as white solids (135 mg) in 69% yield.

#### 2.1.2 Preparation of covalent bidentate ligands (L2, L4–L8)<sup>2</sup>(Method 1)

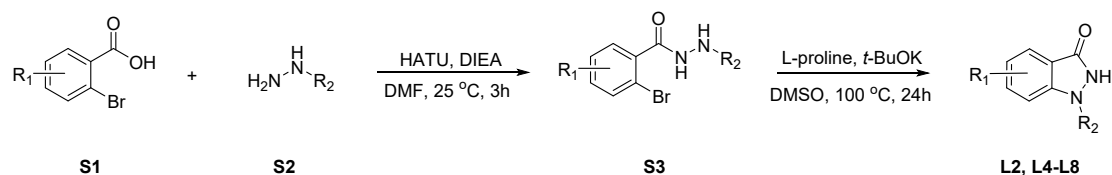

Step 1: A reaction tube (100 mL) with magnetic stir bar was charged with benzoic acid derivative **S1** (10.0 mmol), HATU (15.0 mmol), DIPEA (15.0 mmol). Then 15 mL  $\text{DMSO}$  was added to the reaction tube. Subsequently, hydrazine derivatives **S2** (12.0 mmol) was added to the reaction

system. Then, the reaction system was stirred at 25 °C for 3 h. the reaction mixture was poured in 100 mL water and extracted with ethyl acetate (3 × 50 mL). The combined organic layers were washed with brine and dried over sodium sulphate. The solvent was removed under reduced pressure, and directly loaded onto silica gel for flash column chromatography (PET/EtOAc) to afford the desired products **S3**.

Step 2: A reaction tube (100 mL) with magnetic stir bar was charged with **S3** (5.0 mmol), L-proline (2.0 mmol, 40 mol %), and *t*-BuOK (10.0 mmol, 2.0 equiv) in DMSO (15 mL). The reaction system was stirred at 100 °C for 36 h. The reaction was quenched with a saturated NaHCO<sub>3</sub> solution, and the mixture was extracted with AcOEt. The organic layers were dried over sodium sulphate. The solvent was removed under reduced pressure, and directly loaded onto silica gel for flash column chromatography (PET/EtOAc) to afford the desired products (**L2**, **L4–L8**).

### 2.1.3 Preparation of covalent bidentate ligands (**L3**)

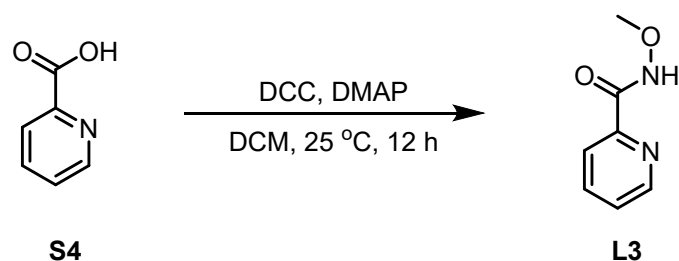

A reaction tube (100 mL) with magnetic stir bar was charged with picolinic acid derivative **S4** (5.0 mmol), methoxyammonium chloride (625 mg, 7.5 mmol), dimethylaminopropyl carbodiimidehydrochloride (1440 mg, 7.5 mmol), and 4-dimethylaminopyridine (1830 mg, 15 mmol). Then 25 mL DCM was added to the reaction tube. Then, the reaction system was stirred at 25 °C for 12 h. The solvent was removed under reduced pressure, and the residue was purified by silica gel column chromatography (PET: EtOAc = 10:1) to afford **L3** as a white solid (1216.4 mg) in 80% yield.

### 2.2 General Procedures for Ketone (Method A)

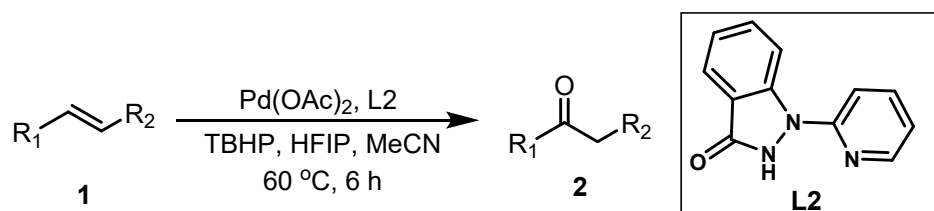

A reaction tube (10 mL) with magnetic stir bar was charged with olefins **1** (1.0 mmol), Pd(OAc)<sub>2</sub> (5.0 mg, 0.02 mmol), **L2** (5.0 mg, 0.025 mmol), TBHP (5 mmol/L in decane, 600 μL, 3.0 mmol), MeCN (0.5 mL) and HFIP (5.5 mL). The reaction was allowed to stir at 60°C oil bath for 6 h. After cooling to room temperature, the reaction mixture was evaporated to remove the solvent and

directly loaded onto silica gel for flash column chromatography (PET/EtOAc) to afford the desired products **2**.

### 3. Characterization Data

#### 3.1 For ligand

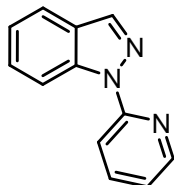

**1-(Pyridin-2-yl)-1H-indazole (L1):**  $^1\text{H}$  NMR (400 MHz,  $\text{CD}_3\text{OD}-d_4$ )  $\delta$  8.76 (dd,  $J = 8.8, 1.2$  Hz, 1H), 8.52 (dd,  $J = 4.8, 1.2$  Hz, 1H), 8.24 (s, 1H), 8.01 (d,  $J = 8.8$  Hz, 1H), 7.93 – 7.89 (m, 1H), 7.81 (d,  $J = 8.0$  Hz, 1H), 7.53 – 7.49 (m, 1H), 7.30 – 7.26 (m, 1H), 7.24 – 7.21 (m, 1H);  $^{13}\text{C}$  NMR (100 MHz,  $\text{CD}_3\text{OD}-d_4$ )  $\delta$  155.5, 148.9, 140.1, 139.8, 138.0, 129.0, 127.4, 123.7, 121.9, 121.4, 116.1, 114.5; HRMS (ESI)  $m/z$  calcd. for  $\text{C}_{12}\text{H}_{10}\text{N}_3$   $[\text{M}+\text{H}]^+$  196.0869, found 196.0872.

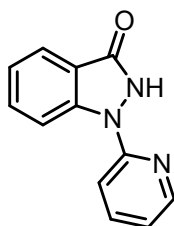

**1-(Pyridin-2-yl)-1,2-dihydro-3H-indazol-3-one (L2):** The title compound was obtained by column chromatography (PET: EtOAc = 10:1) as a white solid (1614.9 mg) in 73% yield according to the **Method 1**.  $^1\text{H}$  NMR (400 MHz,  $\text{DMSO}-d_6$ )  $\delta$  11.59 (s, 1H), 8.68 (d,  $J = 8.5$  Hz, 1H), 8.47 (dd,  $J = 5.0, 1.8$  Hz, 1H), 7.90 (ddd,  $J = 8.9, 7.4, 1.9$  Hz, 1H), 7.80 – 7.70 (m, 2H), 7.53 (ddd,  $J = 8.4, 7.0, 1.2$  Hz, 1H), 7.27 – 7.21 (m, 1H), 7.15 (ddd,  $J = 7.3, 4.9, 1.1$  Hz, 1H);  $^{13}\text{C}$  NMR (100 MHz,  $\text{DMSO}-d_6$ )  $\delta$  157.0, 153.8, 147.8, 139.4, 138.8, 128.9, 121.6, 120.1, 118.6, 116.0, 115.0, 111.5; HRMS (ESI)  $m/z$  calcd. for  $\text{C}_{12}\text{H}_{10}\text{N}_3\text{O}$   $[\text{M}+\text{H}]^+$  212.0818, found 212.0812.

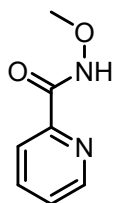

**1-Phenyl-1,2-dihydro-3H-indazol-3-one (L3):**  $^1\text{H}$  NMR (400 MHz,  $\text{DMSO}-d_6$ )  $\delta$  12.03 (s, 1H), 8.61 (dt,  $J = 4.8, 1.4$  Hz, 1H), 8.01 – 7.97 (m, 2H), 7.60 (p,  $J = 4.4$  Hz, 1H), 3.70 (s, 3H);  $^{13}\text{C}$  NMR (100 MHz,  $\text{DMSO}-d_6$ )  $\delta$  161.1, 149.6, 148.5, 137.8, 126.8, 122.1, 63.2; HRMS (ESI)  $m/z$  calcd. for  $\text{C}_7\text{H}_9\text{N}_2\text{O}_2$   $[\text{M}+\text{H}]^+$  153.0659, found 153.0653.

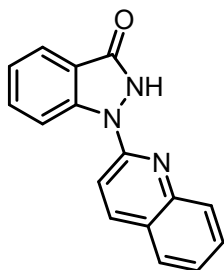

***N*-Methoxyisoquinoline-1-carboxamide (L4):** The title compound was obtained by column chromatography (PET: EtOAc = 10:1) as a white solid (1932.1 mg) in 74% yield according to the **Method 1**.  $^1\text{H}$  NMR (400 MHz, DMSO- $d_6$ )  $\delta$  11.74 (s, 1H), 9.06 (d,  $J$  = 8.5 Hz, 1H), 8.43 (d,  $J$  = 9.0 Hz, 1H), 8.01 (d,  $J$  = 8.8 Hz, 2H), 7.94 (dd,  $J$  = 8.1, 1.4 Hz, 1H), 7.83 (d,  $J$  = 7.9 Hz, 1H), 7.76 (ddd,  $J$  = 8.5, 6.9, 1.5 Hz, 1H), 7.64 (ddd,  $J$  = 8.4, 6.9, 1.2 Hz, 1H), 7.53 – 7.47 (m, 1H), 7.31 (t,  $J$  = 7.5 Hz, 1H);  $^{13}\text{C}$  NMR (100 MHz, DMSO- $d_6$ )  $\delta$  157.3, 152.4, 146.3, 139.6, 138.8, 130.3, 129.3, 128.0, 127.4, 125.1, 124.9, 122.3, 120.3, 116.6, 115.7, 112.4; HRMS (ESI)  $m/z$  calcd. for  $\text{C}_{16}\text{H}_{12}\text{N}_3\text{O}$   $[\text{M}+\text{H}]^+$  262.0975, found 262.0969.

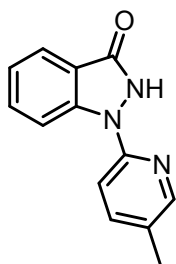

**1-(Quinolin-2-yl)-1,2-dihydro-3H-indazol-3-one (L5):** The title compound was obtained by column chromatography (PET: EtOAc = 10:1) as a white solid (1575.6 mg) in 70% yield according to the **Method 1**.  $^1\text{H}$  NMR (400 MHz, DMSO- $d_6$ )  $\delta$  11.50 (s, 1H), 8.63 (d,  $J$  = 8.6 Hz, 1H), 8.30 (d,  $J$  = 2.2 Hz, 1H), 7.78 – 7.70 (m, 2H), 7.63 (d,  $J$  = 8.5 Hz, 1H), 7.51 (ddd,  $J$  = 8.4, 7.0, 1.2 Hz, 1H), 7.21 (t,  $J$  = 7.5 Hz, 1H), 2.30 (s, 3H);  $^{13}\text{C}$  NMR (100 MHz, DMSO- $d_6$ )  $\delta$  156.7, 151.9, 147.4, 139.3, 139.2, 128.7, 127.6, 121.3, 120.1, 115.7, 114.8, 111.2, 17.3; HRMS (ESI)  $m/z$  calcd. for  $\text{C}_{13}\text{H}_{12}\text{N}_3\text{O}$   $[\text{M}+\text{H}]^+$  226.0975, found 226.0969.

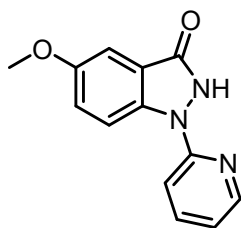

**1-(5-Methylpyridin-2-yl)-1,2-dihydro-3H-indazol-3-one (L6):** The title compound was obtained by column chromatography (PET: EtOAc = 10:1) as a white solid (1856.4 mg) in 77% yield according to the **Method 1**.  $^1\text{H}$  NMR (400 MHz, DMSO- $d_6$ )  $\delta$  11.46 (s, 1H), 8.67 – 8.54 (m, 1H), 8.43 (dd,  $J$  = 5.1, 1.8 Hz, 1H), 7.87 (ddd,  $J$  = 8.9, 7.3, 1.9 Hz, 1H), 7.68 (d,  $J$  = 8.4 Hz, 1H), 7.24 – 7.05 (m, 3H), 3.82 (s, 3H);  $^{13}\text{C}$  NMR (100 MHz, DMSO- $d_6$ )  $\delta$  156.7, 154.6, 153.6, 147.7, 138.7, 134.9, 119.6, 118.3, 116.3, 116.1, 111.0, 100.2, 55.5; HRMS (ESI)  $m/z$  calcd. for  $\text{C}_{13}\text{H}_{12}\text{N}_3\text{O}_2$   $[\text{M}+\text{H}]^+$  242.0924, found 242.0918.

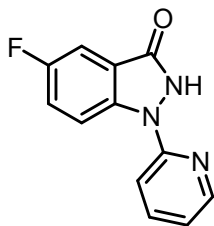

**1-(5-Chloropyridin-2-yl)-1,2-dihydro-3H-indazol-3-one (L7):** The title compound was obtained by column chromatography (PET: EtOAc = 10:1) as a white solid (1718.0 mg) in 75% yield according to the **Method 1**.  $^1\text{H}$  NMR (400 MHz, DMSO- $d_6$ )  $\delta$  11.68 (s, 1H), 8.70 (dd,  $J$  = 9.2, 4.5 Hz, 1H), 8.46 (dd,  $J$  = 5.1, 1.8 Hz, 1H), 7.91 (ddd,  $J$  = 8.9, 7.3, 1.9 Hz, 1H), 7.72 (d,  $J$  = 8.4 Hz, 1H), 7.53 (dd,  $J$  = 8.4, 2.6 Hz, 1H), 7.43 (td,  $J$  = 9.2, 2.6 Hz, 1H), 7.17 (dd,  $J$  = 7.3, 4.9 Hz, 1H);  $^{13}\text{C}$  NMR (100 MHz, DMSO- $d_6$ )  $\delta$  158.5, 156.6 (d,  $J$  = 4.8 Hz), 153.4, 147.7, 138.9, 136.3, 118.9, 117.8, 117.5, 116.6 (d,  $J$  = 8.8 Hz), 116.1 (d,  $J$  = 9.9 Hz), 111.3, 104.9, 104.6; HRMS (ESI)  $m/z$  calcd. for  $\text{C}_{12}\text{H}_9\text{FN}_3\text{O}$   $[\text{M}+\text{H}]^+$  230.0724, found 230.0718.

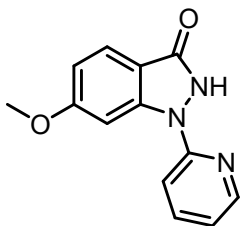

**5-Methoxy-1-(pyridin-2-yl)-1,2-dihydro-3H-indazol-3-one (L8):** The title compound was obtained by column chromatography (PET: EtOAc = 10:1) as a white solid (1880.4 mg) in 78% yield according to the **Method 1**.  $^1\text{H}$  NMR (400 MHz, DMSO- $d_6$ )  $\delta$  11.44 (s, 1H), 8.47 (ddd,  $J$  = 4.9, 1.9, 0.8 Hz, 1H), 8.21 (d,  $J$  = 2.2 Hz, 1H), 7.89 (ddd,  $J$  = 9.0, 7.3, 1.9 Hz, 1H), 7.70 (dt,  $J$  = 8.5, 1.0 Hz, 1H), 7.63 (d,  $J$  = 8.7 Hz, 1H), 7.14 (ddd,  $J$  = 7.4, 4.9, 1.0 Hz, 1H), 6.86 (dd,  $J$  = 8.8, 2.2 Hz, 1H), 3.87 (s, 3H);  $^{13}\text{C}$  NMR (100 MHz, DMSO- $d_6$ )  $\delta$  160.6, 156.9, 153.9, 147.7, 140.8, 138.7, 120.9, 118.5, 112.1, 111.5, 110.2, 97.3, 55.4; HRMS (ESI)  $m/z$  calcd. for  $\text{C}_{13}\text{H}_{12}\text{N}_3\text{O}_2$   $[\text{M}+\text{H}]^+$  242.0924, found 242.0918.

### 3.2 For Ketone Products

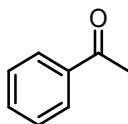

**Acetophenone (2a):** The title compound was obtained by column chromatography (PET: EtOAc = 20:1) as a colorless oil (115.2 mg) in 96% yield according to the **Method A**.  $^1\text{H}$  NMR (400 MHz,  $\text{CDCl}_3$ ):  $\delta$  7.89–7.87 (m, 2H), 7.47 (t,  $J$  = 7.6 Hz, 1H), 7.39–7.35 (t,  $J$  = 7.6 Hz, 2H), 2.51 (s, 3H);  $^{13}\text{C}$  NMR (100 MHz,  $\text{CDCl}_3$ ):  $\delta$  197.9, 137.0, 132.9, 128.4, 128.1, 26.4; HRMS (ESI)  $m/z$  calcd. for  $\text{C}_8\text{H}_8\text{O}$   $[\text{M}+\text{H}]^+$  121.0648, found 121.0642.

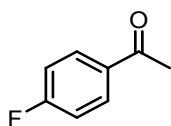

**1-(4-Fluorophenyl)ethan-1-one (2b):** The title compound was obtained by column chromatography (PET: EtOAc = 20:1) as a colorless oil (128.4 mg) in 93% yield according to the **Method A**.  $^1\text{H}$  NMR (400 MHz,  $\text{CDCl}_3$ ):  $\delta$  8.01 – 7.90 (m, 2H), 7.15 – 7.04 (m, 2H), 2.56 (s, 3H);  $^{13}\text{C}$  NMR (100 MHz,  $\text{CDCl}_3$ ):  $\delta$  196.6, 165.8 (d,  $J = 253.0$  Hz), 133.6 (d,  $J = 3.0$  Hz), 131.0 (d,  $J = 9.2$  Hz), 115.7 (d,  $J = 21.8$  Hz), 26.6; HRMS (ESI)  $m/z$  calcd. for  $\text{C}_8\text{H}_8\text{FO}$   $[\text{M}+\text{H}]^+$  139.0554, found 139.0548.

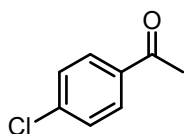

**1-(4-Chlorophenyl)ethan-1-one (2c):** The title compound was obtained by column chromatography (PET: EtOAc = 20:1) as a colorless oil (146.3 mg) in 95% yield according to the **Method A**.  $^1\text{H}$  NMR (400 MHz,  $\text{CDCl}_3$ ):  $\delta$  7.86 (d,  $J = 8.5$  Hz, 2H), 7.39 (d,  $J = 8.6$  Hz, 2H), 2.55 (s, 3H);  $^{13}\text{C}$  NMR (100 MHz,  $\text{CDCl}_3$ ):  $\delta$  196.9, 139.6, 135.5, 129.8, 128.9, 26.6; HRMS (ESI)  $m/z$  calcd. for  $\text{C}_8\text{H}_8\text{ClO}$   $[\text{M}+\text{H}]^+$  155.0258, found 155.0252.

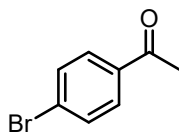

**1-(4-Bromophenyl)ethan-1-one (2d):** The title compound was obtained by column chromatography (PET: EtOAc = 20:1) as a colorless oil (186.1 mg) in 94% yield according to the **Method A**.  $^1\text{H}$  NMR (400 MHz,  $\text{CDCl}_3$ ):  $\delta$  7.86 – 7.75 (m, 2H), 7.65 – 7.53 (m, 2H), 2.58 (s, 3H);  $^{13}\text{C}$  NMR (100 MHz,  $\text{CDCl}_3$ ):  $\delta$  197.2, 135.9, 132.0, 130.0, 128.4, 26.7; HRMS (ESI)  $m/z$  calcd. for  $\text{C}_8\text{H}_8\text{BrO}$   $[\text{M}+\text{H}]^+$  198.9753, found 198.9747.

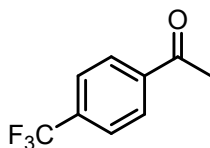

**1-(4-(Trifluoromethyl)phenyl)ethan-1-one (2e):** The title compound was obtained by column chromatography (PET: EtOAc = 20:1) as a colorless oil (173.0 mg) in 92% yield according to the **Method A**.  $^1\text{H}$  NMR (400 MHz,  $\text{CDCl}_3$ ):  $\delta$  8.05 (d,  $J = 8.1$  Hz, 2H), 7.71 (d,  $J = 8.1$  Hz, 2H), 2.63 (s, 3H);  $^{13}\text{C}$  NMR (100 MHz,  $\text{CDCl}_3$ ):  $\delta$  197.1, 139.8, 134.5 (q,  $J = 32.6$  Hz), 128.7, 125.8 (q,  $J = 4.0$  Hz), 125.8 (q,  $J = 271.1$  Hz), 26.6; HRMS (ESI)  $m/z$  calcd. for  $\text{C}_9\text{H}_8\text{F}_3\text{O}$   $[\text{M}+\text{H}]^+$  189.0522, found 189.0516.

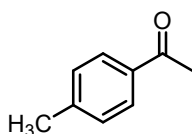



**1-(p-Tolyl)ethan-1-one (2f):** The title compound was obtained by column chromatography (PET: EtOAc = 20:1) as a colorless oil (131.4 mg) in 98% yield according to the **Method A**. <sup>1</sup>H NMR (400 MHz, CDCl<sub>3</sub>): δ 7.80 (d, *J* = 7.9 Hz, 2H), 7.19 (d, *J* = 7.9 Hz, 2H), 2.50 (s, 3H), 2.34 (s, 3H); <sup>13</sup>C NMR (100 MHz, CDCl<sub>3</sub>): δ 197.7, 143.7, 134.6, 129.1, 128.3, 26.4, 21.5; HRMS (ESI) *m/z* calcd. for C<sub>9</sub>H<sub>11</sub>O [M+H]<sup>+</sup> 135.0848, found 135.0842.

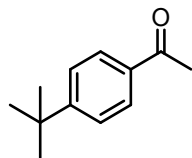

**1-(4-(tert-Butyl)phenyl)ethan-1-one (2g):** The title compound was obtained by column chromatography (PET: EtOAc = 20:1) as a colorless oil (169.1 mg) in 96% yield according to the **Method A**. <sup>1</sup>H NMR (400 MHz, CDCl<sub>3</sub>): δ 7.92 – 7.82 (m, 2H), 7.51 – 7.39 (m, 2H), 2.55 (s, 3H), 1.31 (s, 9H); <sup>13</sup>C NMR (100 MHz, CDCl<sub>3</sub>): δ 197.7, 156.7, 134.6, 128.3, 125.5, 35.0, 31.0, 26.5; HRMS (ESI) *m/z* calcd. for C<sub>12</sub>H<sub>17</sub>O [M+H]<sup>+</sup> 177.1274, found 177.1268.

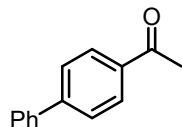

**1-(1,1'-Biphenyl-4-yl)ethan-1-one (2h):** The title compound was obtained by column chromatography (PET: EtOAc = 20:1) as a white solid (180.4 mg) in 92% yield according to the **Method A**. <sup>1</sup>H NMR (400 MHz, CDCl<sub>3</sub>): δ 8.08 – 8.01 (m, 2H), 7.72 – 7.66 (m, 2H), 7.66 – 7.60 (m, 2H), 7.53 – 7.44 (m, 2H), 7.43 – 7.37 (m, 1H), 2.64 (s, 3H); <sup>13</sup>C NMR (100 MHz, CDCl<sub>3</sub>): δ 197.9, 145.9, 140.0, 136.0, 129.1, 129.0, 128.4, 127.4, 127.3, 26.8; HRMS (ESI) *m/z* calcd. for C<sub>17</sub>H<sub>13</sub>O [M+H]<sup>+</sup> 197.0961, found 197.0955.

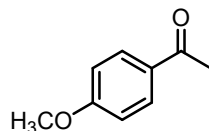

**1-(4-Methoxyphenyl)ethan-1-one (2i):** The title compound was obtained by column chromatography (PET: EtOAc = 20:1) as a colorless oil (145.6 mg) in 97% yield according to the **Method A**. <sup>1</sup>H NMR (400 MHz, CDCl<sub>3</sub>): δ 7.88 (d, *J* = 8.5 Hz, 2H), 6.88 (d, *J* = 8.5 Hz, 2H), 3.81 (s, 3H), 2.50 (d, *J* = 1.2 Hz, 3H); <sup>13</sup>C NMR (100 MHz, CDCl<sub>3</sub>) δ 196.8, 163.5, 130.6, 130.3, 113.7, 55.4, 26.3; HRMS (ESI) *m/z* calcd. for C<sub>9</sub>H<sub>11</sub>O<sub>2</sub> [M+H]<sup>+</sup> 151.0754, found 151.0748.

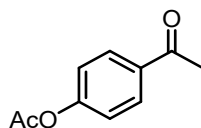

**4-Acetylphenyl acetate (2j):** The title compound was obtained by column chromatography (PET: EtOAc = 20:1) as a colorless oil (169.2 mg) in 95% yield according to the **Method A**. <sup>1</sup>H NMR (400 MHz, CDCl<sub>3</sub>): δ 7.98 (dd, *J* = 9.0, 2.4 Hz, 2H), 7.18 (dd, *J* = 9.0, 2.4 Hz, 2H), 2.59 (s, 3H),

2.32 (s, 3H);  $^{13}\text{C}$  NMR (100 MHz,  $\text{CDCl}_3$ ):  $\delta$  197.1, 169.0, 154.5, 134.8, 130.1, 121.9, 26.7, 21.2; RMS (ESI)  $m/z$  calcd. for  $\text{C}_{10}\text{H}_{11}\text{O}_3$   $[\text{M}+\text{H}]^+$  179.0703, found 179.0697.

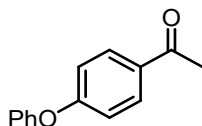

**1-(4-Phenoxyphenyl)ethan-1-one (2k):** The title compound was obtained by column chromatography (PET: EtOAc = 20:1) as a light yellow solid (188.8 mg) in 89% yield according to the **Method A**.  $^1\text{H}$  NMR (400 MHz,  $\text{CDCl}_3$ ):  $\delta$  7.99 – 7.89 (m, 2H), 7.39 (ddd,  $J$  = 9.8, 6.0, 2.2 Hz, 2H), 7.24 – 7.16 (m, 1H), 7.12 – 7.04 (m, 2H), 7.03 – 6.95 (m, 2H), 2.57 (s, 3H);  $^{13}\text{C}$  NMR (100 MHz,  $\text{CDCl}_3$ ):  $\delta$  196.9, 162.1, 155.6, 132.0, 130.7, 130.2, 124.7, 120.3, 117.4, 26.5; RMS (ESI)  $m/z$  calcd. for  $\text{C}_{14}\text{H}_{13}\text{O}_2$   $[\text{M}+\text{H}]^+$  213.0910, found 213.0904.

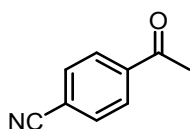

**4-acetylbenzonitrile (2l):** The title compound was obtained by column chromatography (PET: EtOAc = 20:1) as a light yellow solid (94.3 mg) in 65% yield according to the **Method A**.  $^1\text{H}$  NMR (400 MHz,  $\text{CDCl}_3$ )  $\delta$  8.06 – 8.01 (m, 2H), 7.81 – 7.75 (m, 2H), 2.64 (s, 3H);  $^{13}\text{C}$  NMR (100 MHz,  $\text{CDCl}_3$ )  $\delta$  196.7, 140.1, 132.7, 128.8, 118.1, 116.6, 26.9; RMS (ESI)  $m/z$  calcd. for  $\text{C}_9\text{H}_8\text{NO}$   $[\text{M}+\text{H}]^+$  146.0600, found 146.0594.

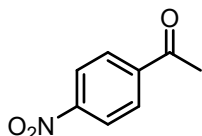

**1-(4-Nitrophenyl)ethan-1-one (2m):** The title compound was obtained by column chromatography (PET: EtOAc = 20:1) as a yellow solid (90.8 mg) in 55% yield according to the **Method A**.  $^1\text{H}$  NMR (400 MHz,  $\text{CDCl}_3$ ):  $\delta$  8.36 – 8.24 (m, 2H), 8.17 – 8.03 (m, 2H), 2.67 (s, 3H);  $^{13}\text{C}$  NMR (100 MHz,  $\text{CDCl}_3$ ):  $\delta$  196.5, 150.5, 141.5, 129.4, 124.0, 27.1; RMS (ESI)  $m/z$  calcd. for  $\text{C}_8\text{H}_8\text{NO}_3$   $[\text{M}+\text{H}]^+$  166.0499, found 166.0493

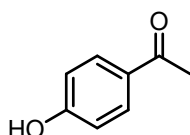

**1-(4-Hydroxyphenyl)ethan-1-one (2n):** The title compound was obtained by column chromatography (PET: EtOAc = 20:1) as a colorless oil (92.5 mg) in 68% yield according to the **Method A**.  $^1\text{H}$  NMR (400 MHz,  $\text{CDCl}_3$ ):  $\delta$  7.99 (s, 1H), 7.94 – 7.87 (m, 2H), 6.98 – 6.91 (m, 2H), 2.58 (s, 3H);  $^{13}\text{C}$  NMR (100 MHz,  $\text{CDCl}_3$ ):  $\delta$  198.8, 161.6, 131.4, 129.6, 115.7, 26.4; RMS (ESI)  $m/z$  calcd. for  $\text{C}_8\text{H}_9\text{O}_2$   $[\text{M}+\text{H}]^+$  139.0597, found 137.0591.

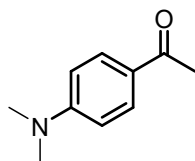

**1-(4-(Dimethylamino)phenyl)ethan-1-one (2o):** The title compound was obtained by column chromatography (PET: EtOAc = 20:1) as a colorless oil (138.6 mg) in 85% yield according to the **Method A**.  $^1\text{H NMR}$  (400 MHz,  $\text{CDCl}_3$ )  $\delta$  7.92 – 7.82 (m, 2H), 6.69 – 6.59 (m, 2H), 3.05 (s, 6H), 2.50 (s, 3H);  $^{13}\text{C NMR}$  (100 MHz,  $\text{CDCl}_3$ )  $\delta$  196.6, 153.5, 130.6, 125.4, 110.7, 40.1, 26.1; RMS (ESI)  $m/z$  calcd. for  $\text{C}_{10}\text{H}_{14}\text{NO}$   $[\text{M}+\text{H}]^+$  164.1070, found 164.1064.

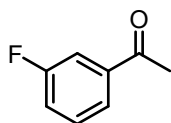

**1-(3-Fluorophenyl)ethan-1-one (2q):** The title compound was obtained by column chromatography (PET: EtOAc = 20:1) as a colorless oil (129.8 mg) in 94% yield according to the **Method A**.  $^1\text{H NMR}$  (400 MHz,  $\text{CDCl}_3$ ):  $\delta$  7.66 (dt,  $J = 7.7, 1.4$  Hz, 1H), 7.55 (ddd,  $J = 9.5, 2.8, 1.6$  Hz, 1H), 7.37 (td,  $J = 7.9, 5.4$  Hz, 1H), 7.18 (tdd,  $J = 8.2, 2.7, 1.1$  Hz, 1H), 2.52 (s, 3H);  $^{13}\text{C NMR}$  (100 MHz,  $\text{CDCl}_3$ ):  $\delta$  196.7 (d,  $J = 2.1$  Hz), 162.7 (d,  $J = 246.1$  Hz), 139.1 (d,  $J = 6.1$  Hz), 130.2 (d,  $J = 7.6$  Hz), 124.1 (d,  $J = 2.9$  Hz), 120.0 (d,  $J = 21.5$  Hz), 114.8 (d,  $J = 22.2$  Hz), 26.6; RMS (ESI)  $m/z$  calcd. for  $\text{C}_8\text{H}_8\text{FO}$   $[\text{M}+\text{H}]^+$  139.0554, found 139.0548.

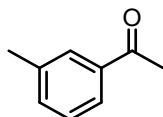

**1-(*m*-Tolyl)ethan-1-one (2r):** The title compound was obtained by column chromatography (PET: EtOAc = 20:1) as a colorless oil (127.4 mg) in 95% yield according to the **Method A**.  $^1\text{H NMR}$  (400 MHz,  $\text{CDCl}_3$ ):  $\delta$  7.79 – 7.68 (m, 2H), 7.37 – 7.27 (m, 2H), 2.55 (s, 3H), 2.37 (s, 3H);  $^{13}\text{C NMR}$  (100 MHz,  $\text{CDCl}_3$ ):  $\delta$  198.4, 138.3, 137.1, 133.9, 128.8, 128.4, 125.6, 26.6, 21.3; RMS (ESI)  $m/z$  calcd. for  $\text{C}_9\text{H}_{11}\text{O}$   $[\text{M}+\text{H}]^+$  135.0804, found 135.0798

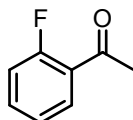

**1-(2-Fluorophenyl)ethan-1-one (2s):** The title compound was obtained by column chromatography (PET: EtOAc = 20:1) as a colorless oil (128.4 mg) in 93% yield according to the **Method A**.  $^1\text{H NMR}$  (400 MHz,  $\text{CDCl}_3$ ):  $\delta$  7.77 (td,  $J = 7.7, 2.0$  Hz, 1H), 7.42 (dddd,  $J = 9.0, 7.2, 5.0, 1.9$  Hz, 1H), 7.12 (td,  $J = 7.6, 1.2$  Hz, 1H), 7.03 (ddd,  $J = 11.3, 8.3, 1.1$  Hz, 1H), 2.54 (d,  $J = 4.9$  Hz, 3H);  $^{13}\text{C NMR}$  (100 MHz,  $\text{CDCl}_3$ ):  $\delta$  195.6 (d,  $J = 3.3$  Hz), 162.1 (d,  $J = 253.2$  Hz), 134.6 (d,  $J = 9.0$  Hz), 130.4 (d,  $J = 2.5$  Hz), 125.5 (d,  $J = 12.8$  Hz), 124.3 (d,  $J = 3.7$  Hz), 116.5 (d,  $J = 21.7$  Hz), 31.2 (d,  $J = 7.3$  Hz); RMS (ESI)  $m/z$  calcd. for  $\text{C}_8\text{H}_8\text{FO}$   $[\text{M}+\text{H}]^+$  139.0554, found 139.0548.

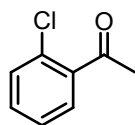

**1-(2-Chlorophenyl)ethan-1-one (2t):** The title compound was obtained by column chromatography (PET: EtOAc = 20:1) as a colorless oil (146.3 mg) in 95% yield according to the **Method A**.  $^1\text{H}$  NMR (400 MHz,  $\text{CDCl}_3$ ):  $\delta$  7.51 (dd,  $J = 7.6, 1.6$  Hz, 1H), 7.39 – 7.31 (m, 2H), 7.28 (ddd,  $J = 8.4, 6.7, 2.2$  Hz, 1H), 2.60 (s, 3H);  $^{13}\text{C}$  NMR (100 MHz,  $\text{CDCl}_3$ ):  $\delta$  200.3, 139.0, 132.0, 131.1, 130.6, 129.3, 126.9, 30.6; RMS (ESI)  $m/z$  calcd. for  $\text{C}_8\text{H}_8\text{ClO}$   $[\text{M}+\text{H}]^+$  155.0258, found 139.0252.

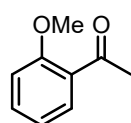

**1-(2-Methoxyphenyl)ethan-1-one (2u):** The title compound was obtained by column chromatography (PET: EtOAc = 20:1) as a colorless oil (141.1 mg) in 94% yield according to the **Method A**.  $^1\text{H}$  NMR (400 MHz,  $\text{CDCl}_3$ ):  $\delta$  7.69 (dd,  $J = 7.7, 1.8$  Hz, 1H), 7.42 (ddd,  $J = 8.7, 7.3, 1.8$  Hz, 1H), 7.10 – 6.84 (m, 2H), 3.86 (s, 3H), 2.57 (d,  $J = 1.2$  Hz, 3H);  $^{13}\text{C}$  NMR (100 MHz,  $\text{CDCl}_3$ ):  $\delta$  199.8, 158.9, 133.7, 130.3, 128.1, 120.5, 111.6, 55.4, 31.8; RMS (ESI)  $m/z$  calcd. for  $\text{C}_9\text{H}_{11}\text{O}_2$   $[\text{M}+\text{H}]^+$  151.0754, found 151.0748.

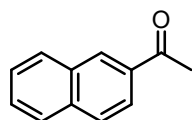

**1-(Naphthalen-2-yl)ethan-1-one (2w):** The title compound was obtained by column chromatography (PET: EtOAc = 20:1) as a white solid (159.9 mg) in 94% yield according to the **Method A**.  $^1\text{H}$  NMR (400 MHz,  $\text{CDCl}_3$ )  $\delta$  8.49 – 8.45 (m, 1H), 8.03 (dd,  $J = 8.6, 1.8$  Hz, 1H), 7.99 – 7.95 (m, 1H), 7.92 – 7.86 (m, 2H), 7.58 (dddd,  $J = 19.5, 8.2, 6.9, 1.4$  Hz, 2H), 2.73 (s, 3H).  $^{13}\text{C}$  NMR (100 MHz,  $\text{CDCl}_3$ )  $\delta$  198.3, 135.7, 134.6, 132.6, 130.3, 129.7, 128.6, 128.6, 127.9, 126.9, 124.0, 26.8; RMS (ESI)  $m/z$  calcd. for  $\text{C}_{12}\text{H}_{11}\text{O}$   $[\text{M}+\text{H}]^+$  171.0804, found 171.0798.

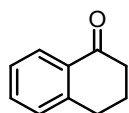

**3,4-Dihydronaphthalen-1-(2H)-one (2x):** The title compound was obtained by column chromatography (PET: EtOAc = 20:1) as a brown liquid (118.3 mg) in 81% yield according to the **Method A**.  $^1\text{H}$  NMR (400 MHz,  $\text{CDCl}_3$ )  $\delta$  8.06 (dd,  $J = 7.9, 1.5$  Hz, 1H), 7.49 (td,  $J = 7.5, 1.5$  Hz, 1H), 7.36 – 7.25 (m, 2H), 2.99 (t,  $J = 6.1$  Hz, 2H), 2.68 (dd,  $J = 7.2, 5.8$  Hz, 2H), 2.17 (p,  $J = 6.3$  Hz, 2H);  $^{13}\text{C}$  NMR (100 MHz,  $\text{CDCl}_3$ )  $\delta$  198.5, 144.6, 133.5, 132.7, 128.9, 127.2, 126.7, 39.2, 29.8, 23.4; RMS (ESI)  $m/z$  calcd. for  $\text{C}_{10}\text{H}_{11}\text{O}$   $[\text{M}+\text{H}]^+$  147.0804, found 147.0798.

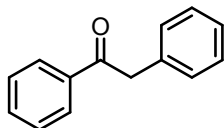

**1,2-Diphenylethan-1-one (2y):** The title compound was obtained by column chromatography (PET: EtOAc = 20:1) as a white solid (174.5 mg) in 89% yield according to the **Method A**.  $^1\text{H}$  NMR (400 MHz,  $\text{CDCl}_3$ )  $\delta$  8.08 – 8.04 (m, 2H), 7.63 – 7.57 (m, 1H), 7.53 – 7.47 (m, 2H), 7.40 – 7.34 (m, 2H), 7.31 (d,  $J$  = 8.6 Hz, 3H), 4.33 (s, 2H);  $^{13}\text{C}$  NMR (100 MHz,  $\text{CDCl}_3$ )  $\delta$  197.8, 136.7, 134.7, 133.3, 129.6, 128.8, 128.8, 128.8, 127.0, 45.6; RMS (ESI)  $m/z$  calcd. for  $\text{C}_{14}\text{H}_{13}\text{O}$   $[\text{M}+\text{H}]^+$  197.0961, found 197.0955.

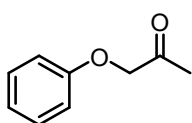

**1-Phenoxypropan-2-one (2aa):** The title compound was obtained by column chromatography (PET: EtOAc = 20:1) as a colorless oil (117.0 mg) in 78% yield according to the **Method A**.  $^1\text{H}$  NMR (400 MHz,  $\text{CDCl}_3$ )  $\delta$  7.33 – 7.27 (m, 2H), 7.00 (tt,  $J$  = 7.4, 1.1 Hz, 1H), 6.91 – 6.86 (m, 2H), 4.53 (s, 2H), 2.28 (s, 3H);  $^{13}\text{C}$  NMR (100 MHz,  $\text{CDCl}_3$ )  $\delta$  206.1, 157.8, 129.8, 121.8, 114.6, 73.1, 26.7; RMS (ESI)  $m/z$  calcd. for  $\text{C}_9\text{H}_{11}\text{O}_2$   $[\text{M}+\text{H}]^+$  151.0754, found 151.0748.

## 4. Mechanistic Study

### 4.1 Preparation of Intermediates

#### 4.1.1 Preparation of IN1

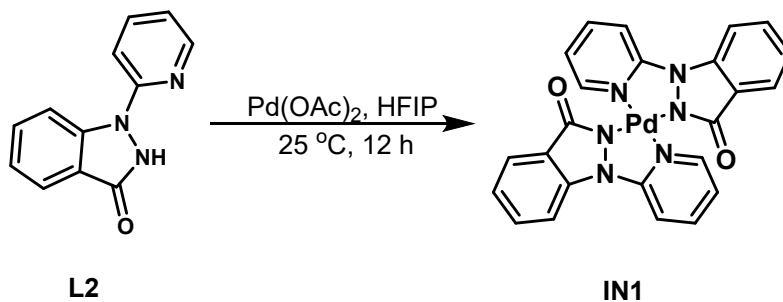

A reaction tube (10 mL) with magnetic stir bar was charged with 1-(Pyridin-2-yl)-1,2-dihydro-3H-indazol-3-one **L2** (105 mg, 0.50 mmol),  $\text{Pd}(\text{OAc})_2$  (47 mg, 0.20 mmol), and HFIP (5 mL). The reaction was allowed to stir at room temperature for 12 h. Upon completion, the reaction mixture was evaporated to remove the solvent and the solid obtained was washed with ether to remove excess **L2**. Analytically pure intermediate **IN1** was obtained yellow solids (55 mg) in 52% yield by recrystallization using DCM/EA at room temperature. **IN1** was then used to perform NMR.

$^1\text{H}$  NMR (400 MHz,  $\text{DMSO}-d_6$ ): 9.67 (dd,  $J$  = 6.0, 1.2 Hz, 2H), 8.11–8.06 (m, 4H), 7.95 (d,  $J$  = 7.6 Hz, 2H), 7.78 (d,  $J$  = 7.6 Hz, 2H), 7.68 (t,  $J$  = 8.0 Hz, 2H), 7.37 (t,  $J$  = 7.6 Hz, 2H), 7.08 (t,  $J$  = 7.2 Hz, 2H);  $^{13}\text{C}$  NMR (100 MHz,  $\text{CDCl}_3$ )  $\delta$  118.2 (2C), 147.9 (2C), 138.5 (2C), 130.0 (2C), 122.0 (2C), 120.7 (2C), 118.8 (2C), 112.8 (2C), 112.0 (2C).

#### 4.1.2 Preparation of IN2

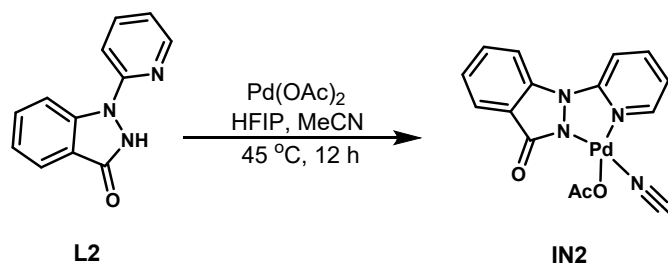

A reaction tube (10 mL) with magnetic stir bar was charged with 1-(Pyridin-2-yl)-1,2-dihydro-3*H*-indazol-3-one **L2** (78 mg, 0.25 mmol), Pd(OAc)<sub>2</sub> (47 mg, 0.20 mmol), MeCN (0.5 mL) and HFIP (5 mL). The reaction was allowed to stir at room temperature for 12 h. Upon completion, the reaction mixture was evaporated to remove the solvent and the solid obtained was washed with ether to remove excess **L2**. Analytically pure intermediate **IN2** was obtained yellow solids (61 mg) in 73% yield by recrystallization using DCM/EA at room temperature. **IN2** was then used to perform NMR.

<sup>1</sup>H NMR (400 MHz, CDCl<sub>3</sub>:CD<sub>3</sub>OD = 1:6): δ 9.44 (d, *J* = 5.2 Hz, 1H), 7.97–7.93 (m, 1H), 7.84–7.81 (m, 2H), 7.74 (d, *J* = 8.4 Hz, 1H), 7.61 (t, *J* = 8.4 Hz, 1H), 7.32 (t, *J* = 7.2 Hz, 1H), 6.94 (t, *J* = 6.8 Hz, 1H), 2.01 (s, 3H), 1.97 (s, 3H); <sup>13</sup>C NMR (100 MHz, CDCl<sub>3</sub>:CD<sub>3</sub>OD = 1:6): δ 194.0, 176.1, 155.9, 143.2, 142.3, 133.7, 133.0, 125.5, 124.6, 118.7, 114.4, 114.3, 109.8, 21.9, 2.0.

#### 4.1.3 The reaction of IN1 to IN2

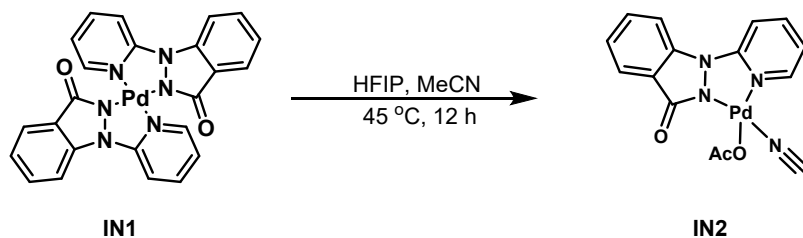

A reaction tube (5 mL) with magnetic stir bar was charged with **IN1** (53 mg, 0.10 mmol), MeCN (0.5 mL) and HFIP (5 mL). The reaction was allowed to stir at 45 °C oil bath for 12 h. Upon completion, the reaction mixture was evaporated to remove the solvent and the solid obtained was washed with ether to remove excess complexes. Analytically pure intermediate **IN2** was obtained as yellow solids (37 mg) in 82% yield by recrystallization using DCM/EA at room temperature.

## 4.2 1a Leading to Products 2a Using IN1 or IN2

### 4.2.1 1a leading to product 2a using IN1

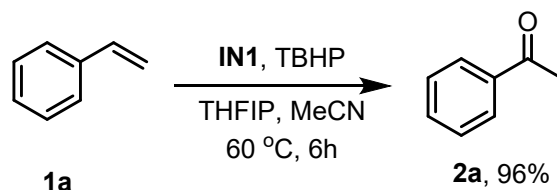

A reaction tube (10 mL) with magnetic stir bar was charged with olefins **1a** (1.0 mmol), **IN1** (10.0 mg, 0.02 mmol), TBHP (5 mmol/L in decane, 600  $\mu$ L, 3.0 mmol), MeCN (0.5 mL) and HFIP (5.5 mL). The reaction was allowed to stir at 60°C oil bath for 6 h. After cooling to room temperature, the reaction mixture was evaporated to remove the solvent and directly loaded onto silica gel for flash column chromatography (PET/EtOAc) to afford the desired products **2a** (115 mg) in 96% yield.

### 4.2.1 1a leading to product 2a using IN2

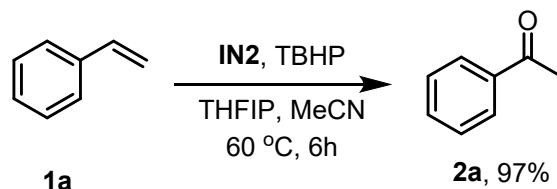

A reaction tube (10 mL) with magnetic stir bar was charged with olefins **1a** (1.0 mmol), **IN2** (8.0 mg, 0.02 mmol), TBHP (5 mmol/L in decane, 600  $\mu$ L, 3.0 mmol), MeCN (0.5 mL) and HFIP (5.5 mL). The reaction was allowed to stir at 60°C oil bath for 6 h. After cooling to room temperature, the reaction mixture was evaporated to remove the solvent and directly loaded onto silica gel for flash column chromatography (PET/EtOAc) to afford the desired products **2a** (117 mg) in 97% yield.

## 4.3 1a leading to products 2a with IN1 and extra Pd(OAc)<sub>2</sub>

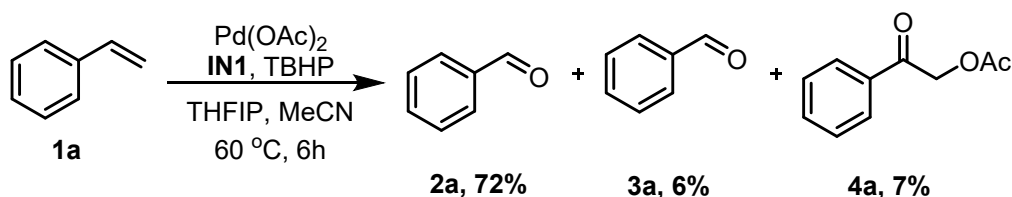

A reaction tube (20 mL) with magnetic stir bar was charged with olefins **1a** (2.0 mmol), **IN1** (21.0 mg, 0.04 mmol), Pd(OAc)<sub>2</sub> (23.4 mg, 0.10 mmol), TBHP (5 mmol/L in decane, 1.2 mL, 3.0 mmol), MeCN (1.0 mL) and HFIP (12 mL). The reaction was allowed to stir at 60°C oil bath for 6 h. After cooling to room temperature, the reaction mixture was evaporated to remove the solvent and directly loaded onto silica gel for flash column chromatography (PET/EtOAc) to afford the desired products **2a** (172 mg) in 72% yield. Intriguingly, the incorporation of Pd(OAc)<sub>2</sub> leads to the concurrent production of both **3a** and **4a**, with the yields of 6% and 7%, respectively.

#### 4.4 1a leading to products 2a with IN2 and extra Pd(OAc)<sub>2</sub>

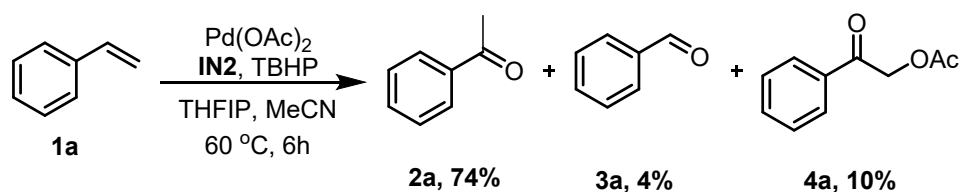

A reaction tube (20 mL) with magnetic stir bar was charged with olefins **1a** (2.0 mmol), **IN2** (16.0 mg, 0.04 mmol), Pd(OAc)<sub>2</sub> (23.4 mg, 0.10 mmol), TBHP (5 mmol/L in decane, 1.2 mL, 3.0 mmol), MeCN (1.0 mL) and HFIP (12 mL). The reaction was allowed to stir at 60°C oil bath for 6 h. After cooling to room temperature, the reaction mixture was evaporated to remove the solvent and directly loaded onto silica gel for flash column chromatography (PET/EtOAc) to afford the desired products **2a** (178 mg) in 74% yield. Intriguingly, the incorporation of Pd(OAc)<sub>2</sub> leads to the concurrent production of both **3a** and **4a**, with the yields of 4% and 10%, respectively.

## 5. References

- (1) Teo, Y.; Yong, F.; Sim, S. Ligand-free Cu<sub>2</sub>O-catalyzed cross coupling of nitrogen heterocycles with iodopyridines. *Tetrahedron* **2013**, *69*, 7279–7284.



## 8. NMR Spectra

L1

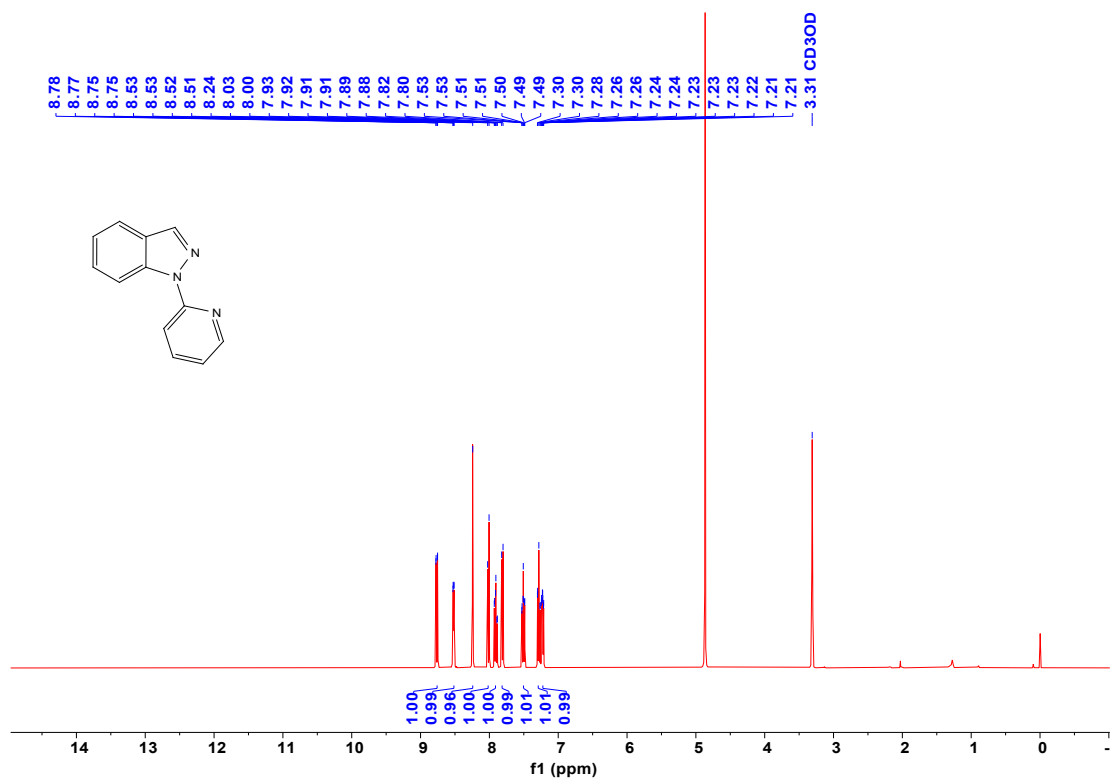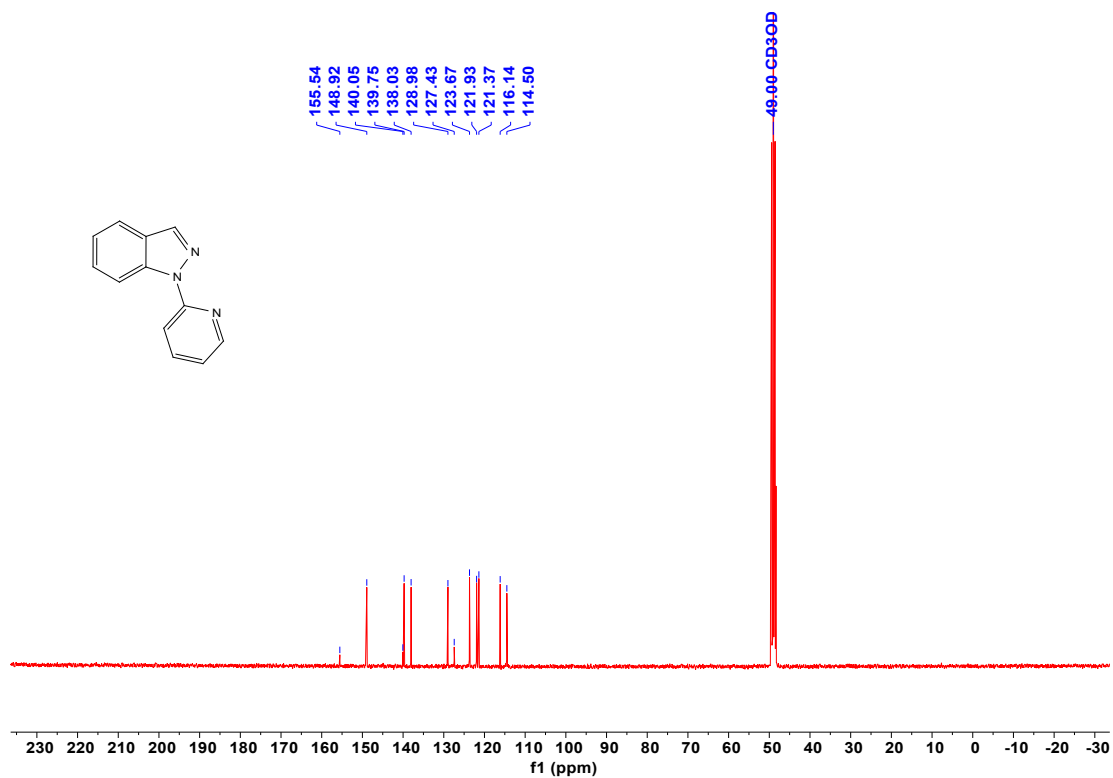

L2

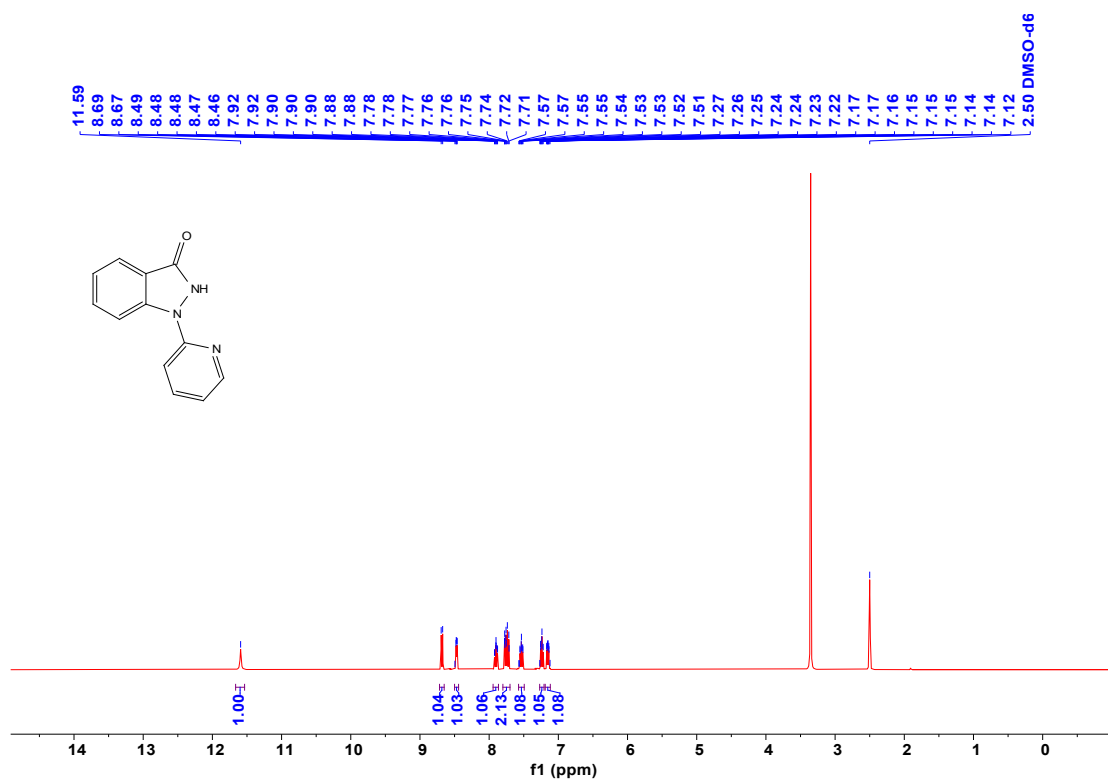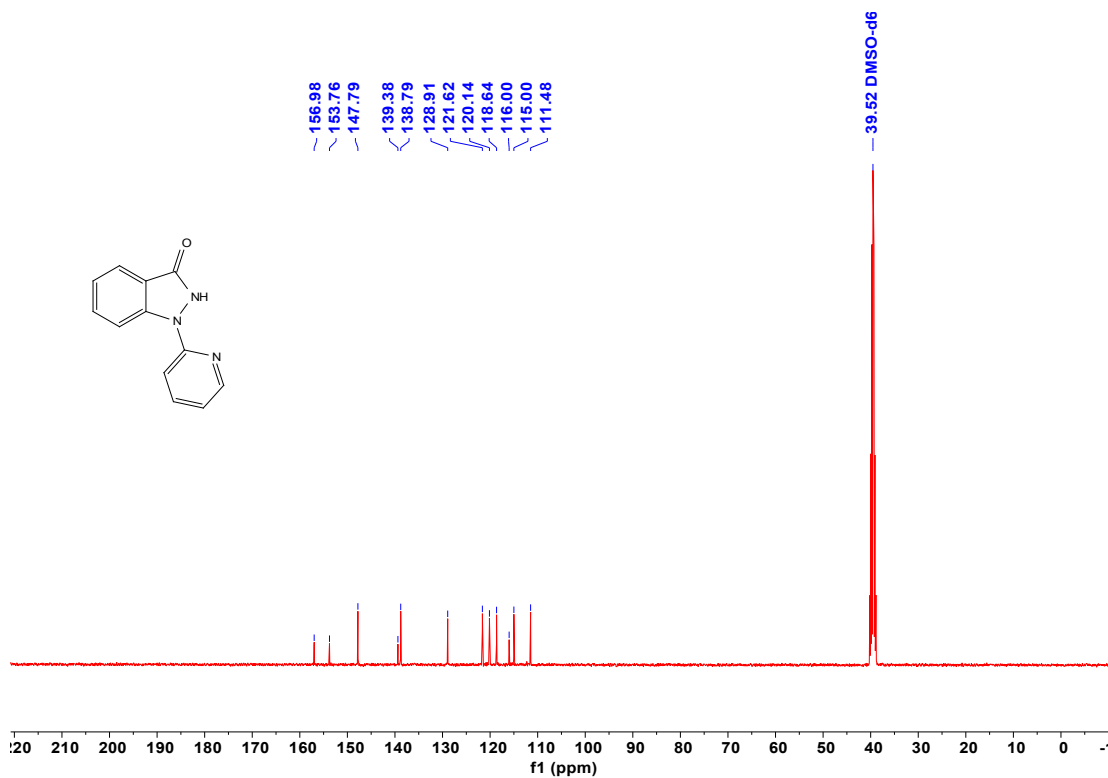

L3

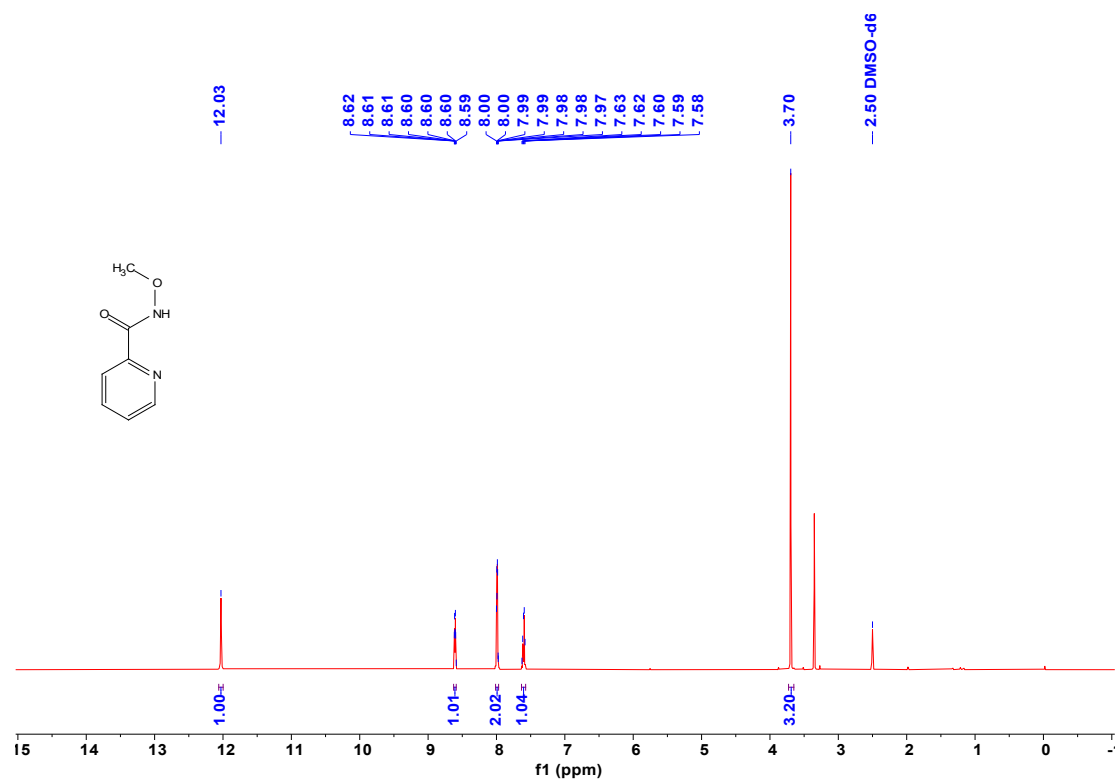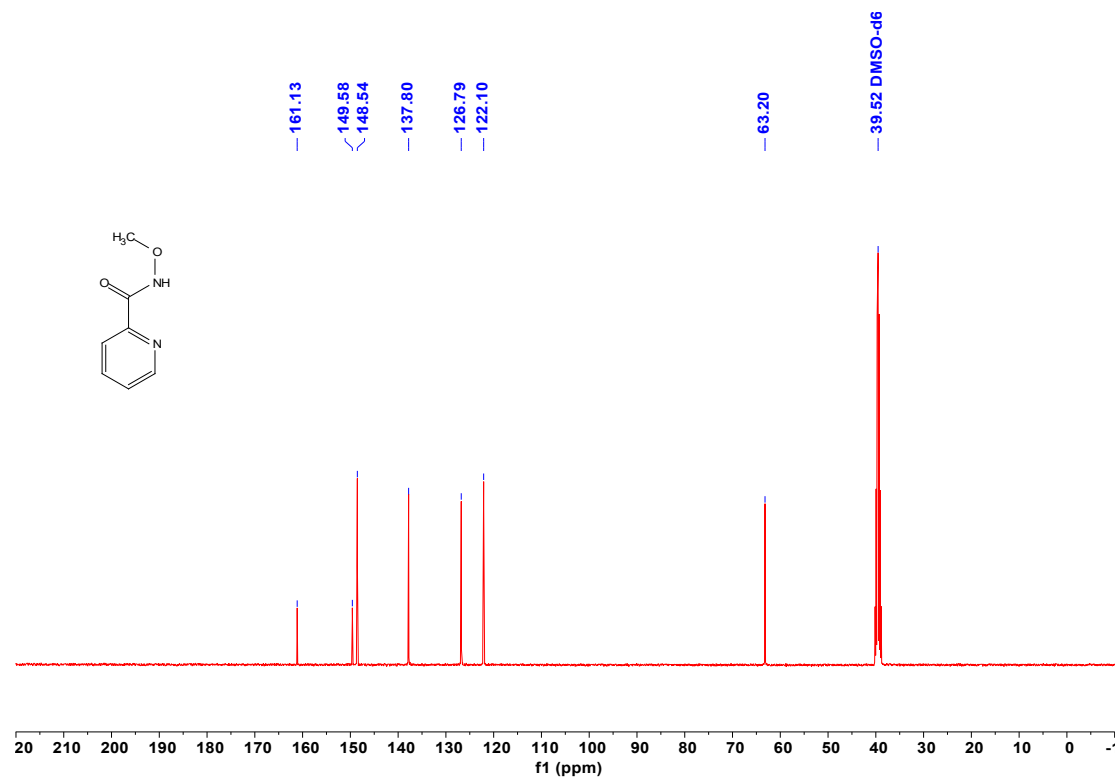

L4

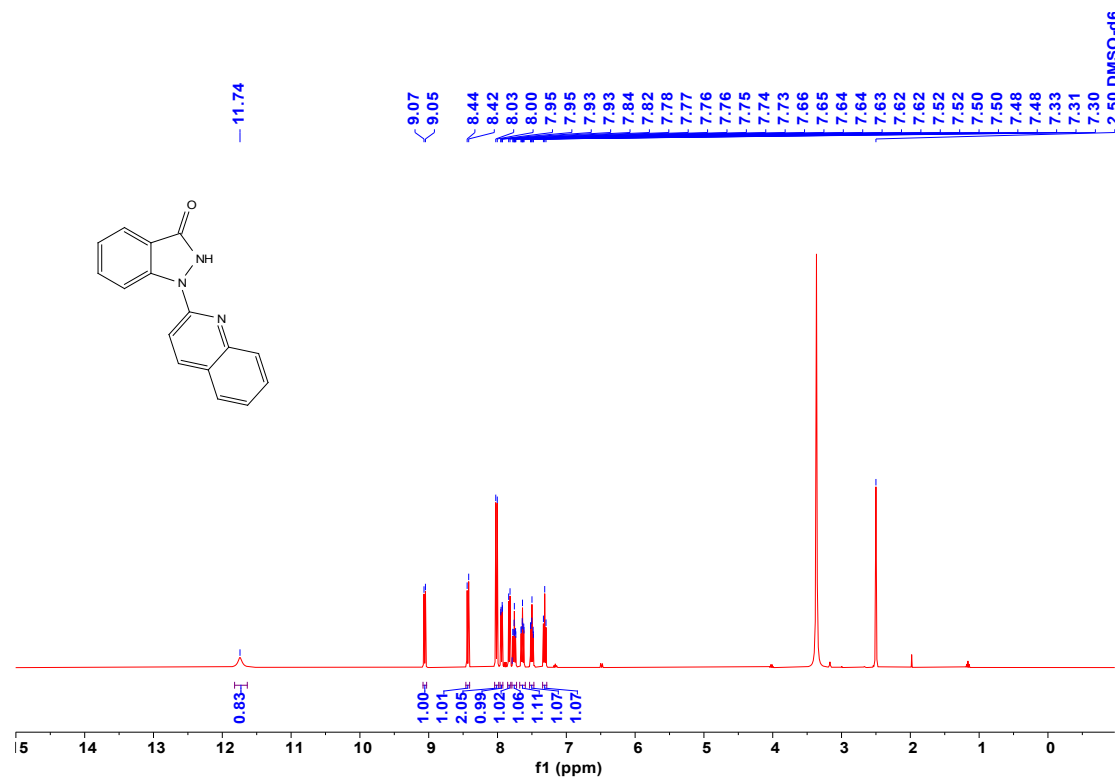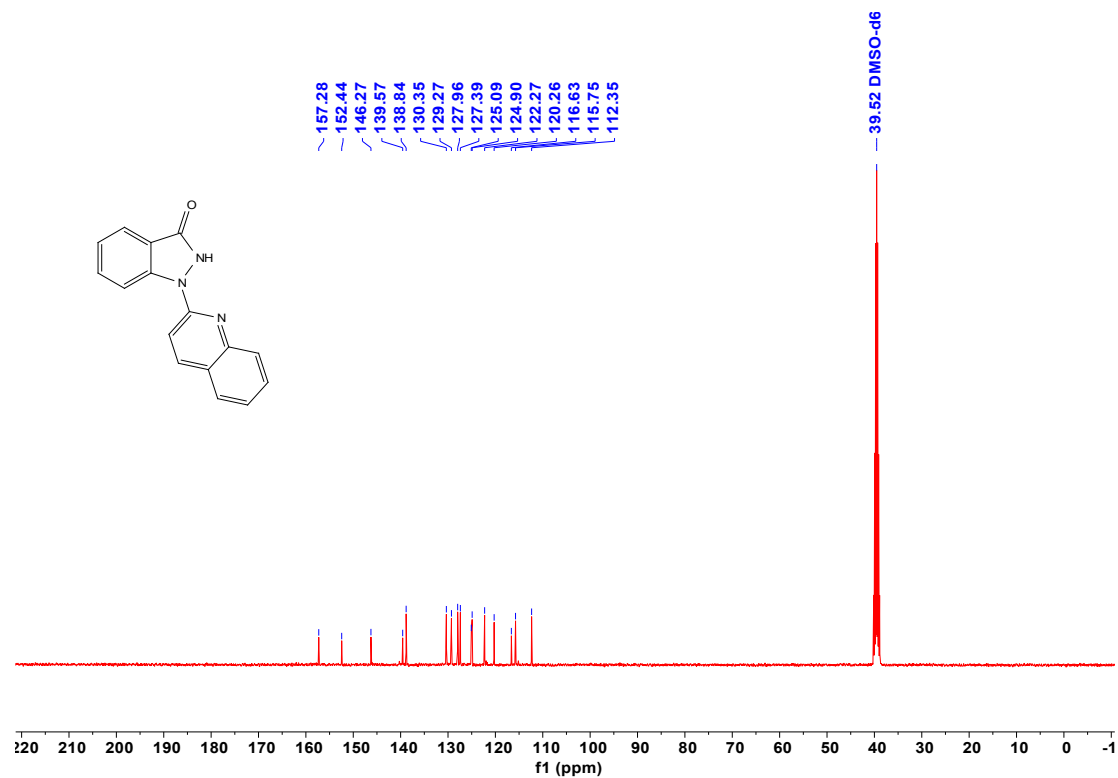

L5

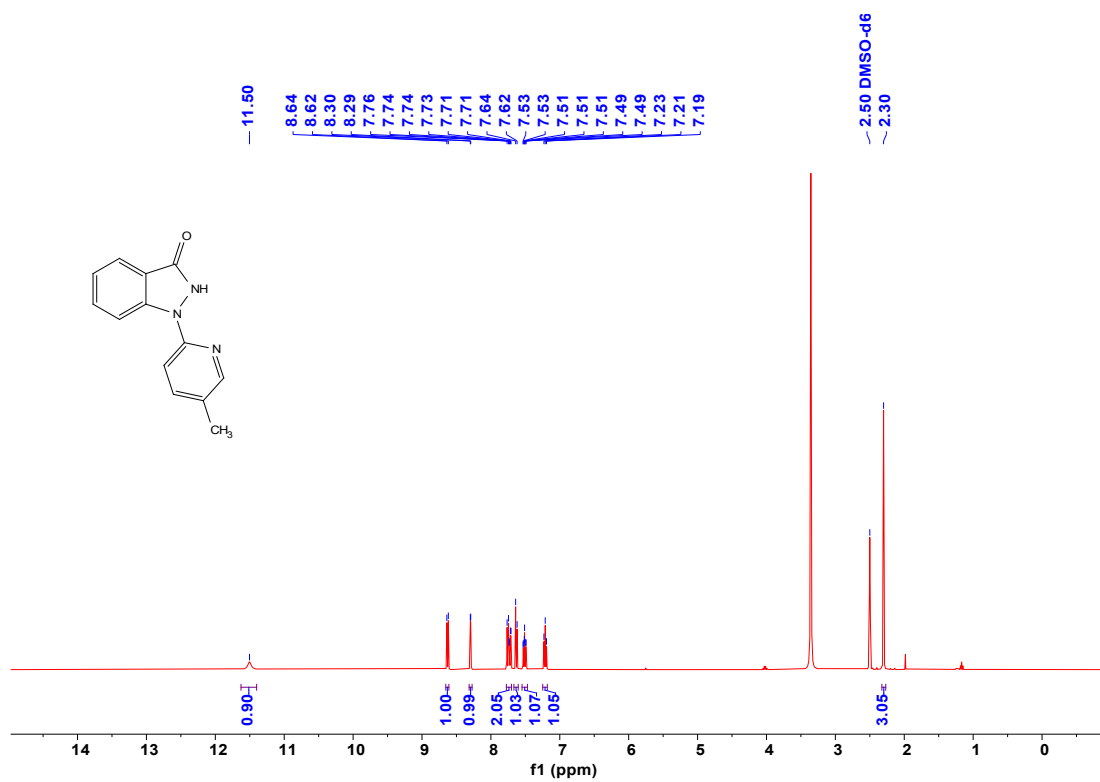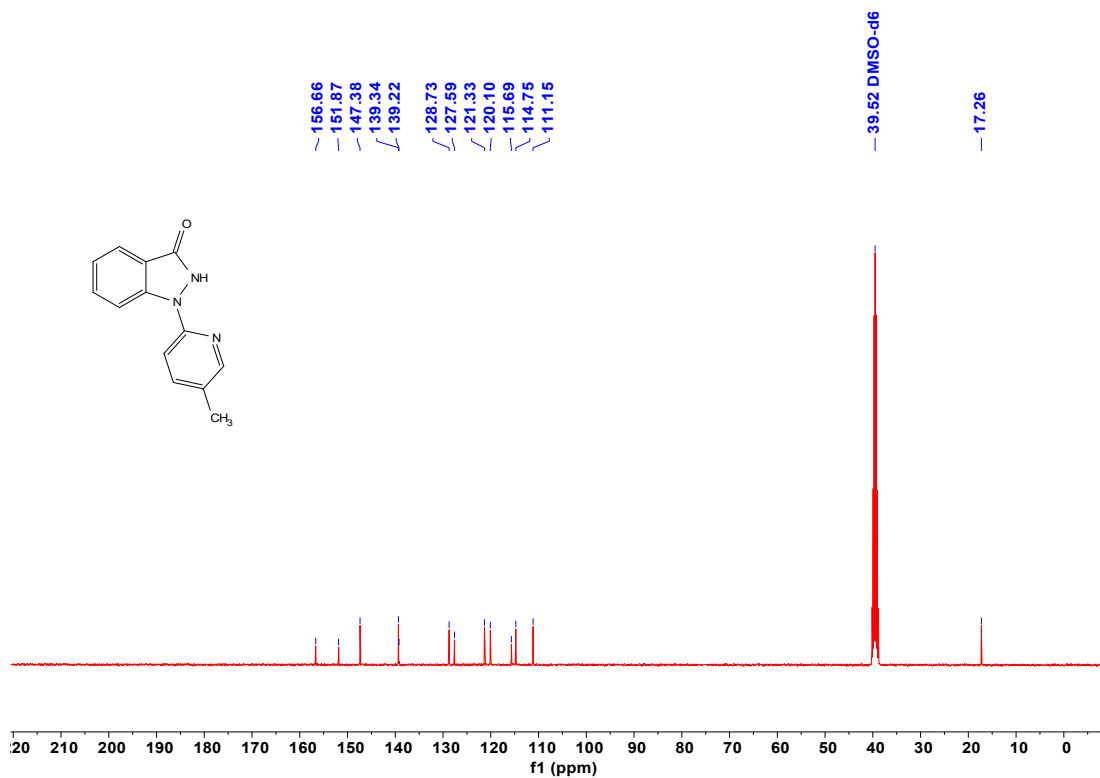

L6

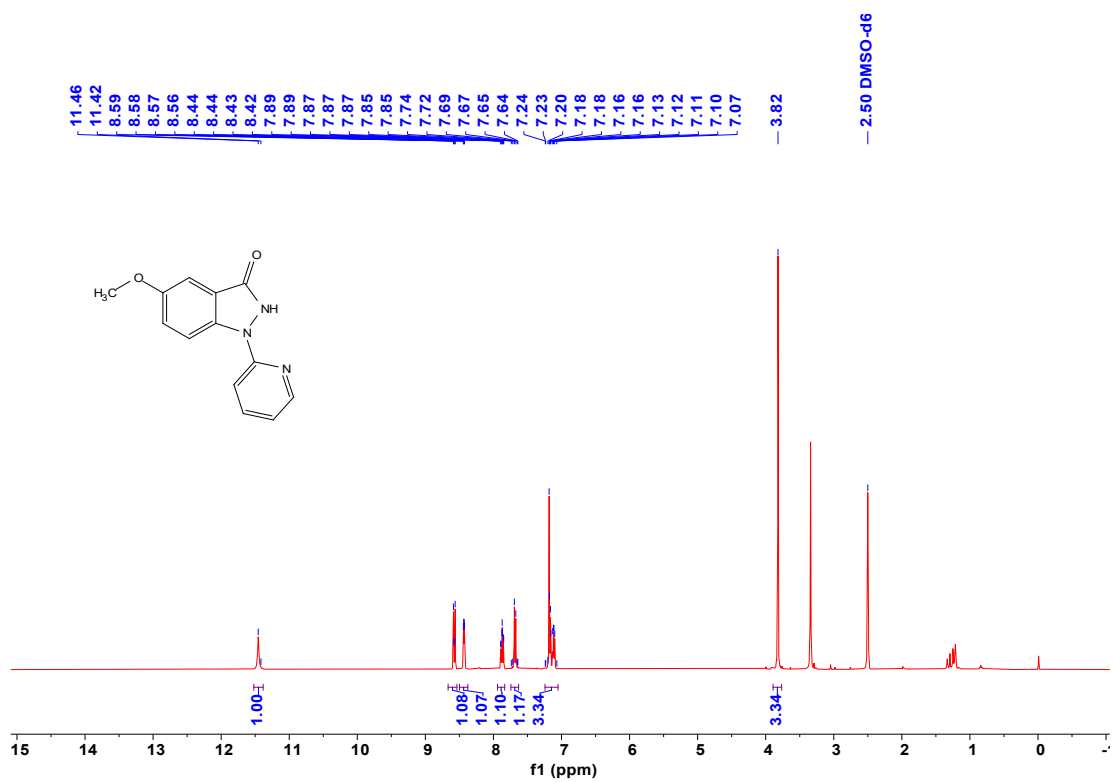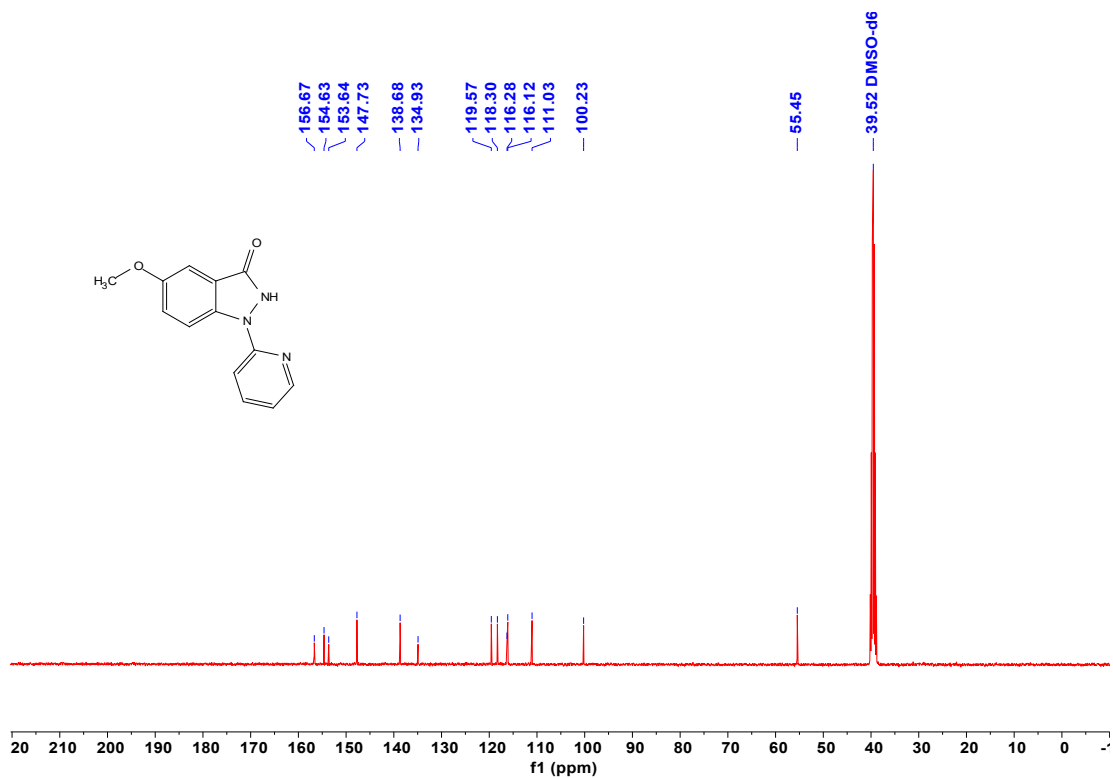

L7

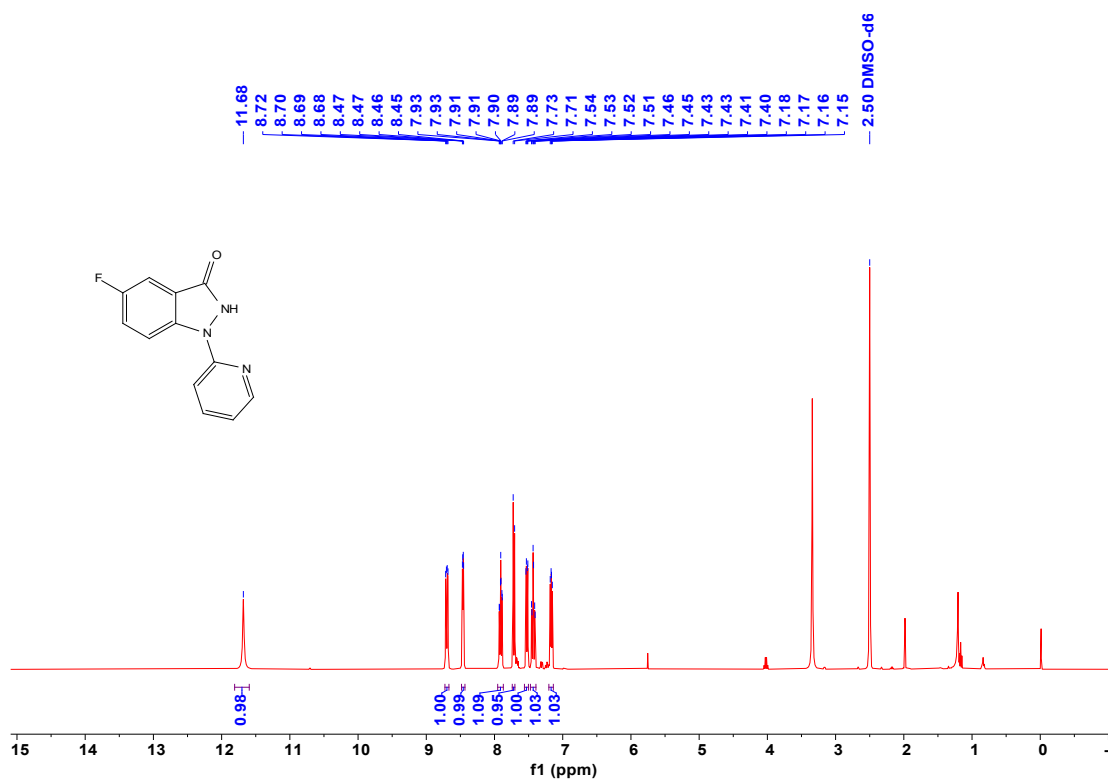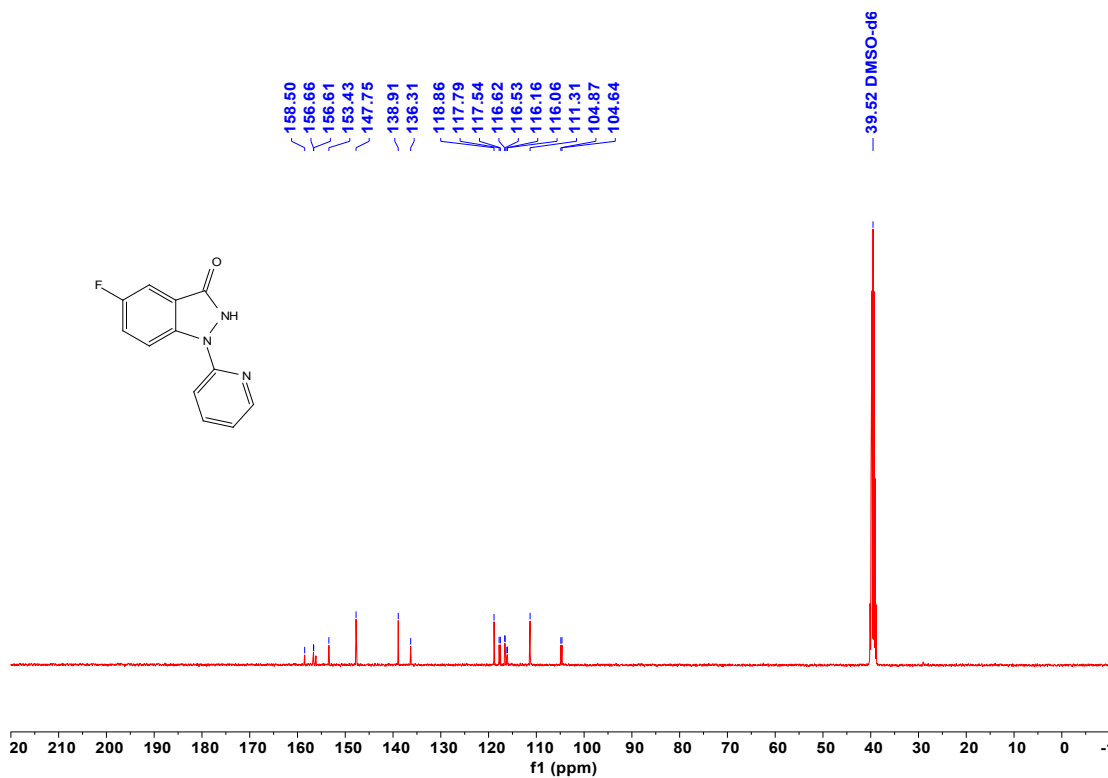

L8

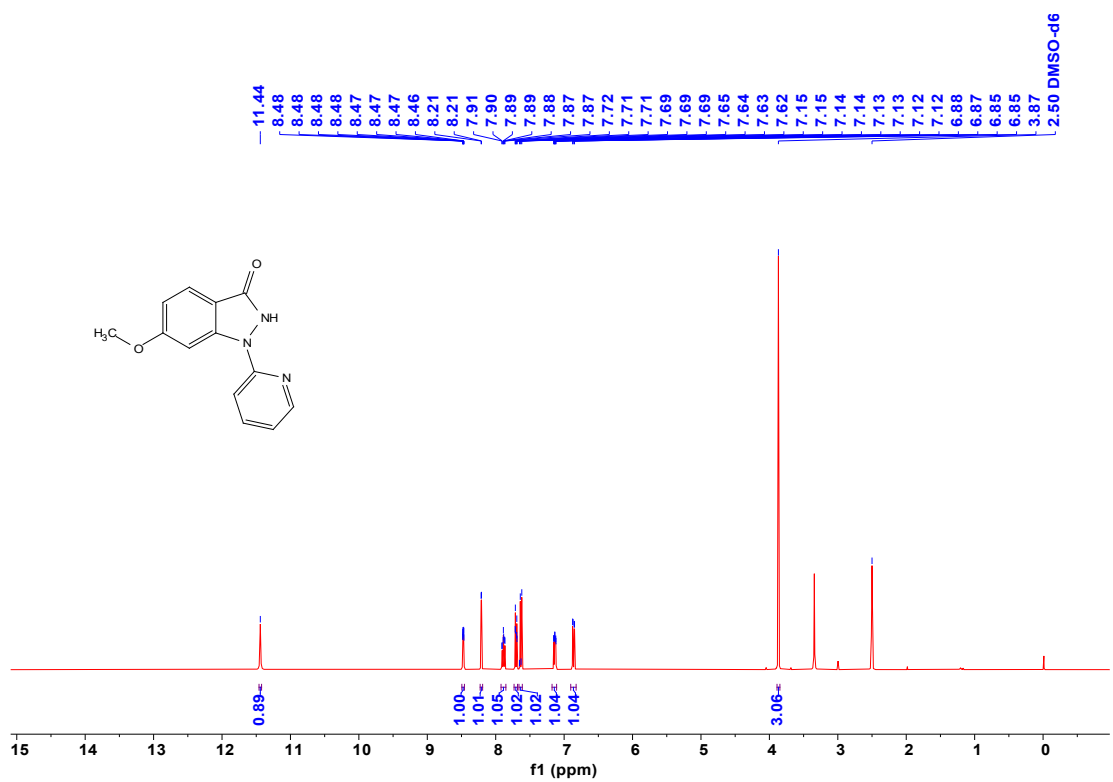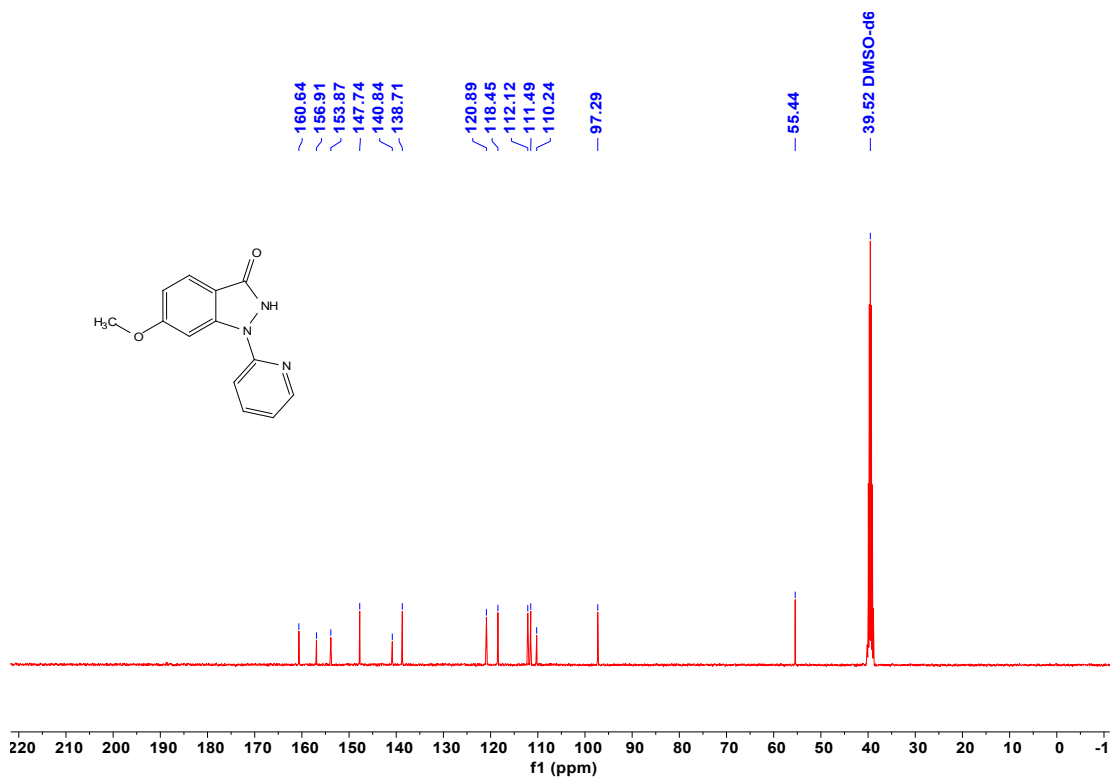



2a

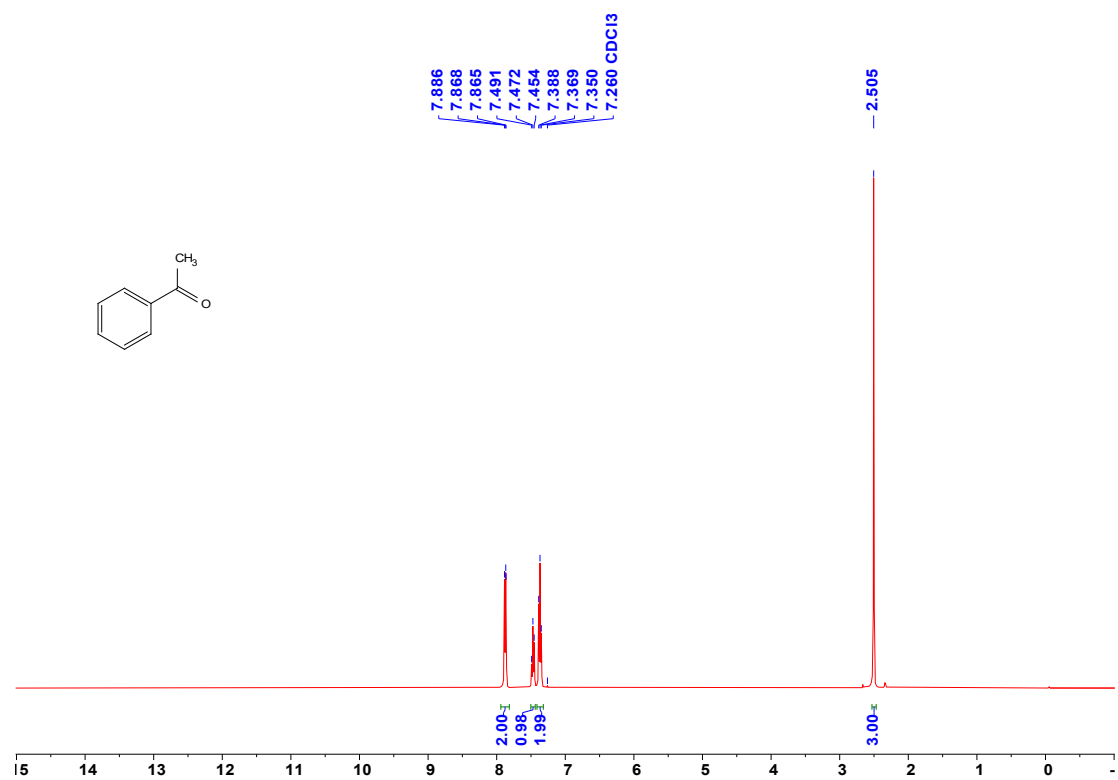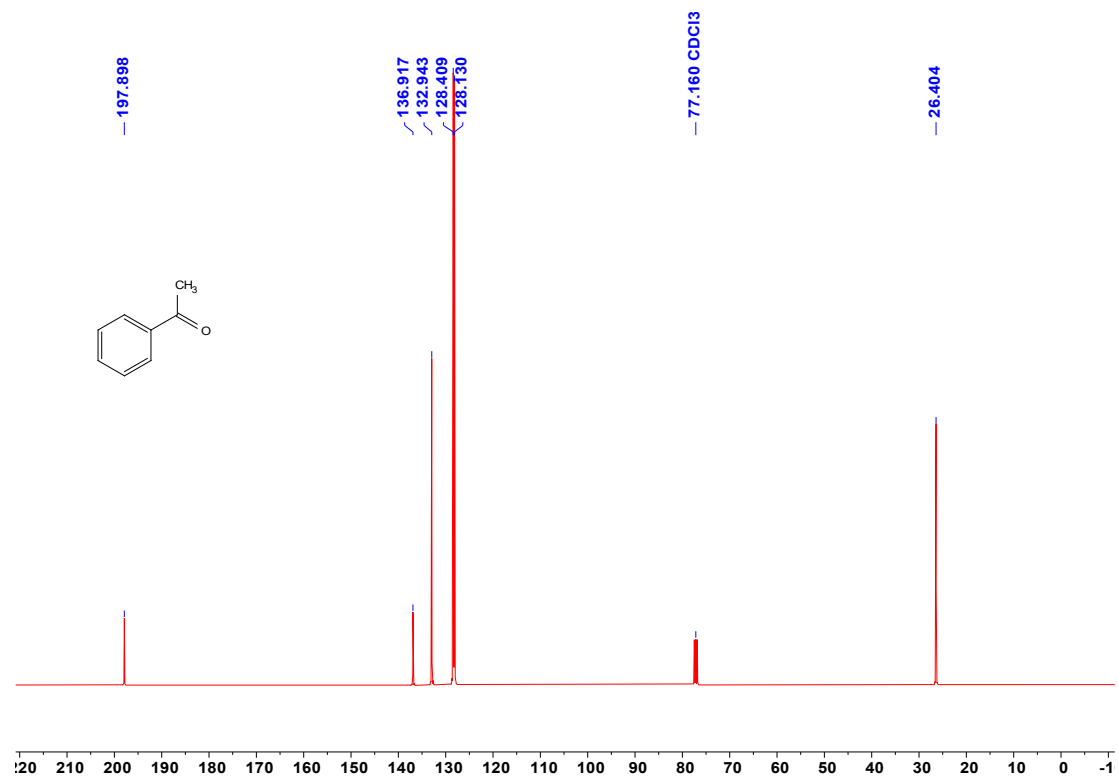

2b

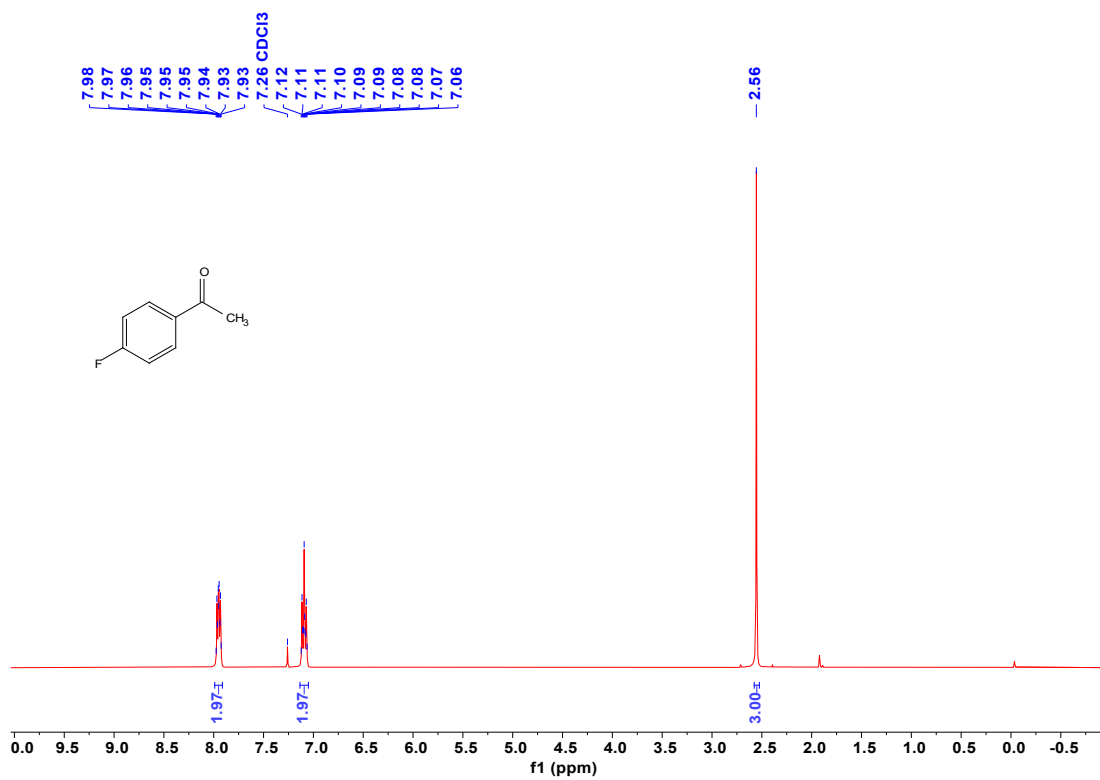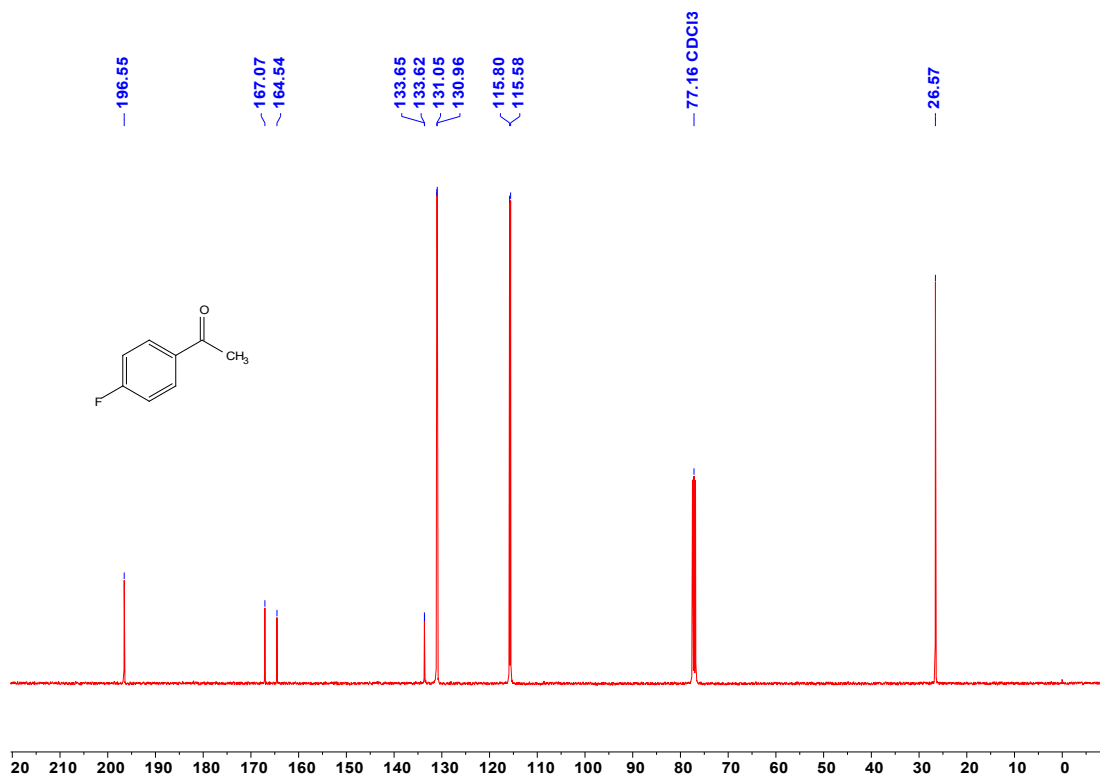

2c

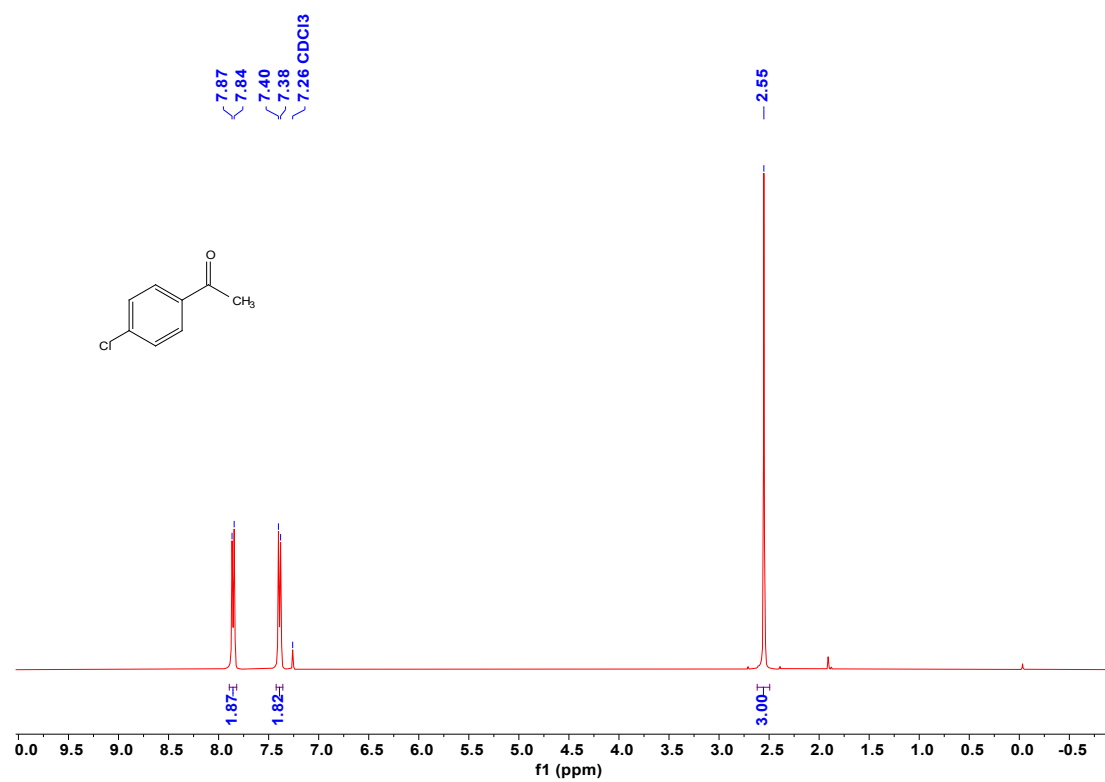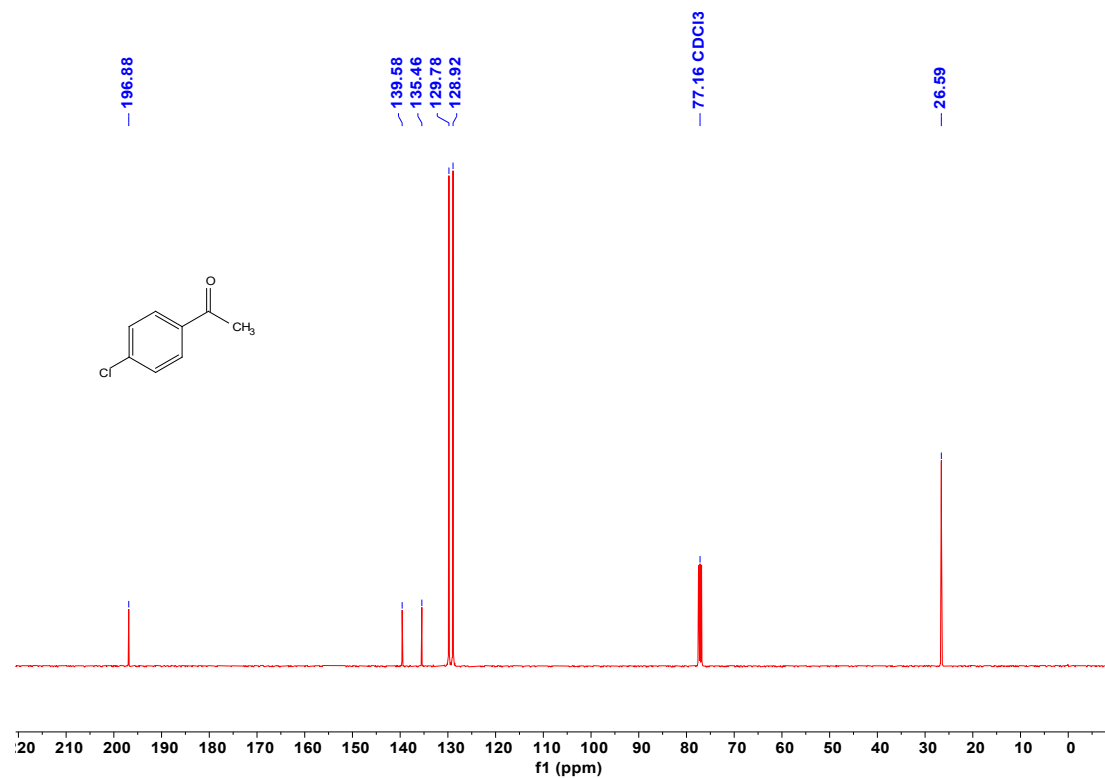

2d

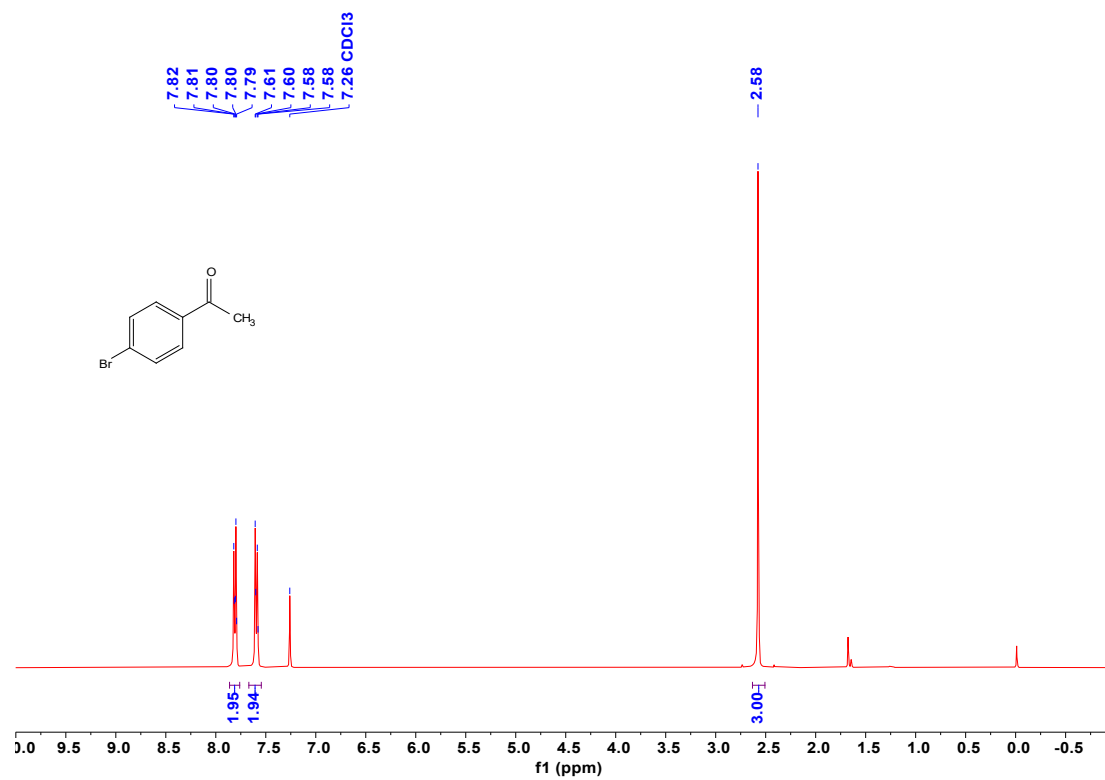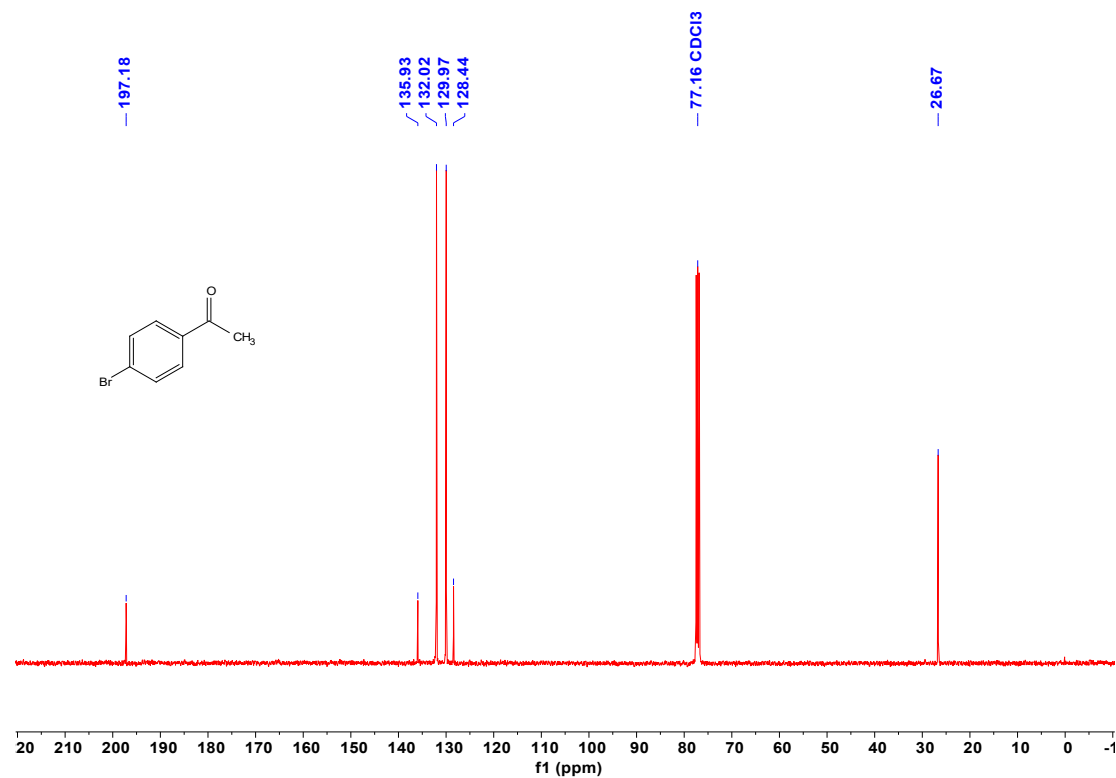

2e

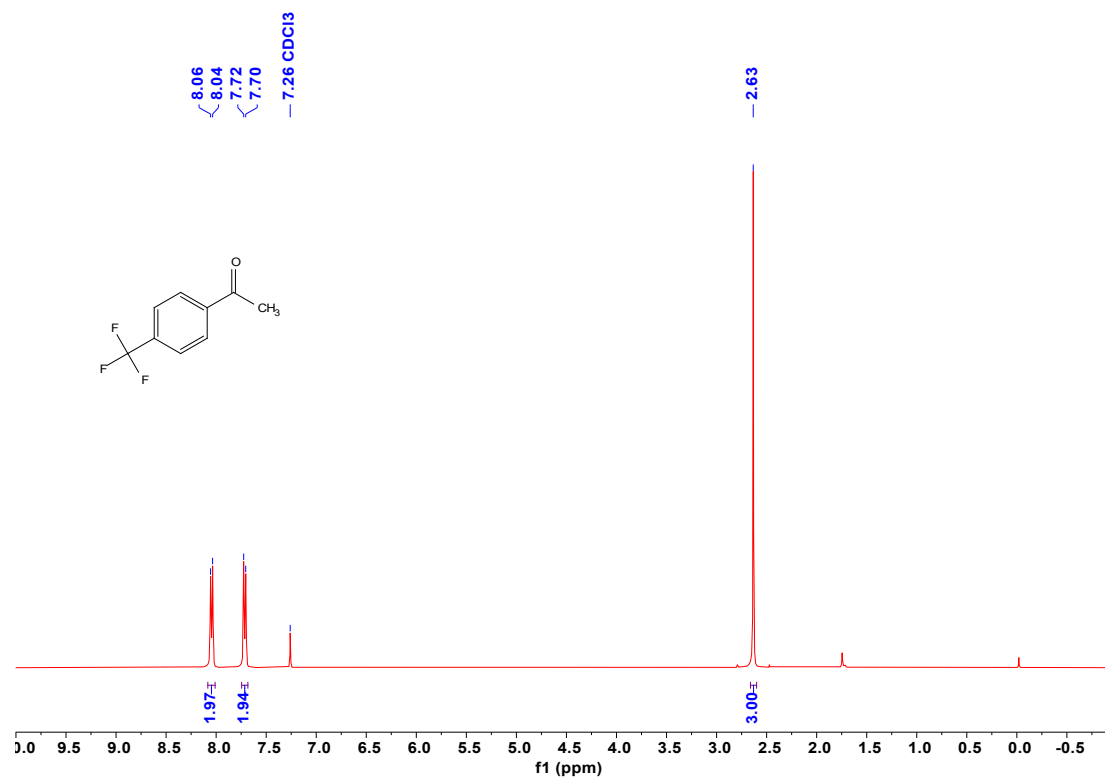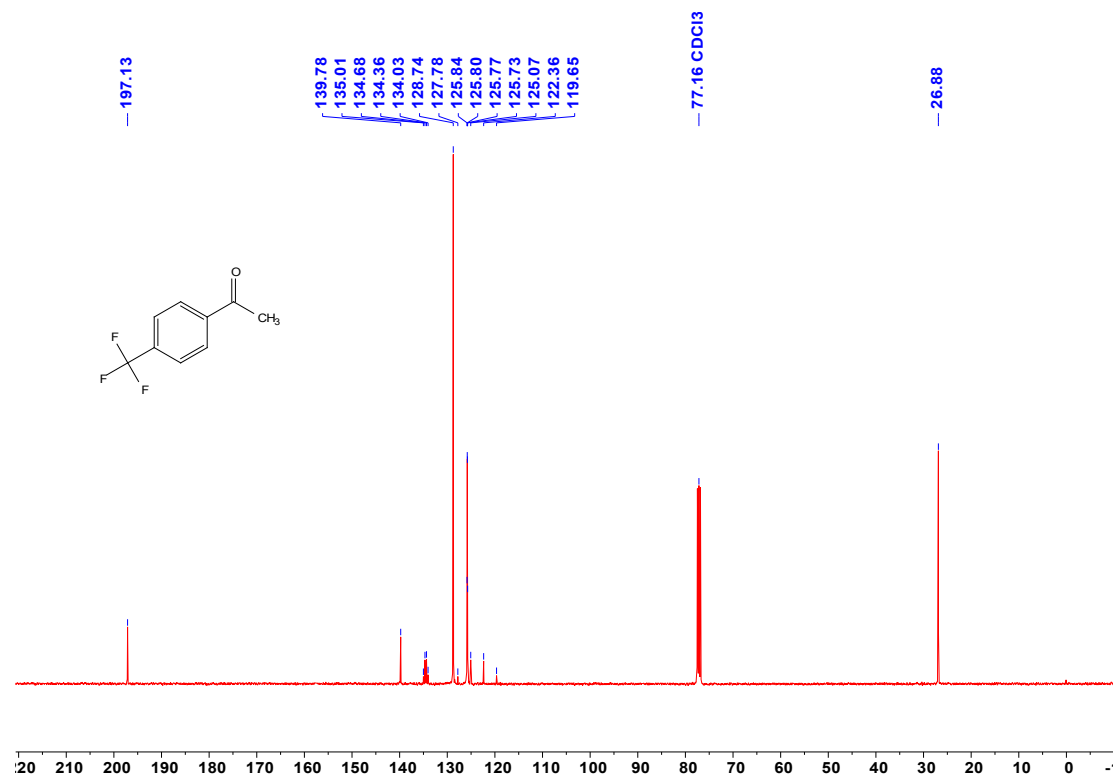

2f

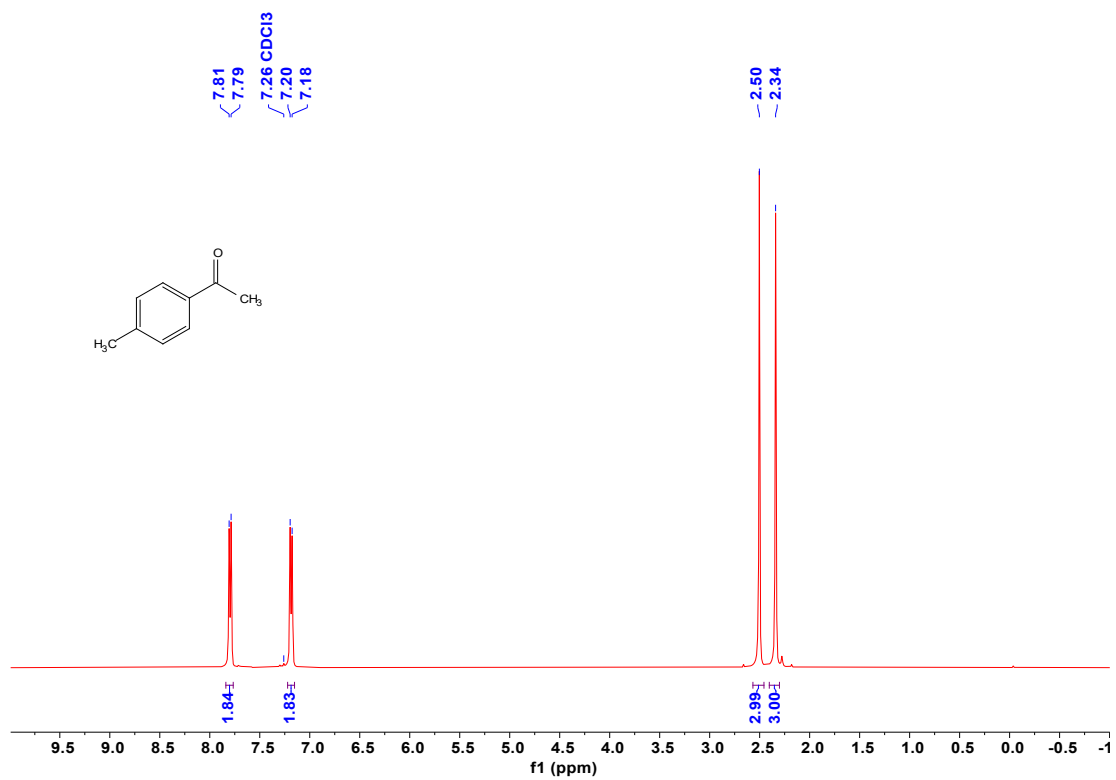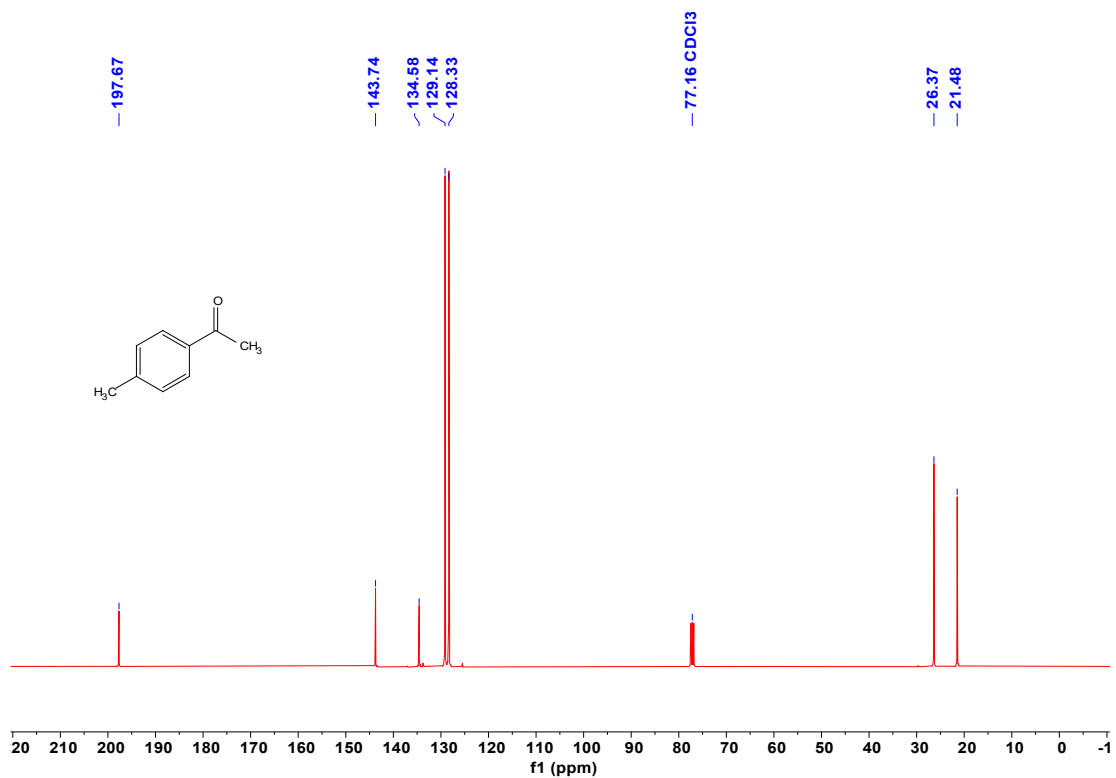

2g

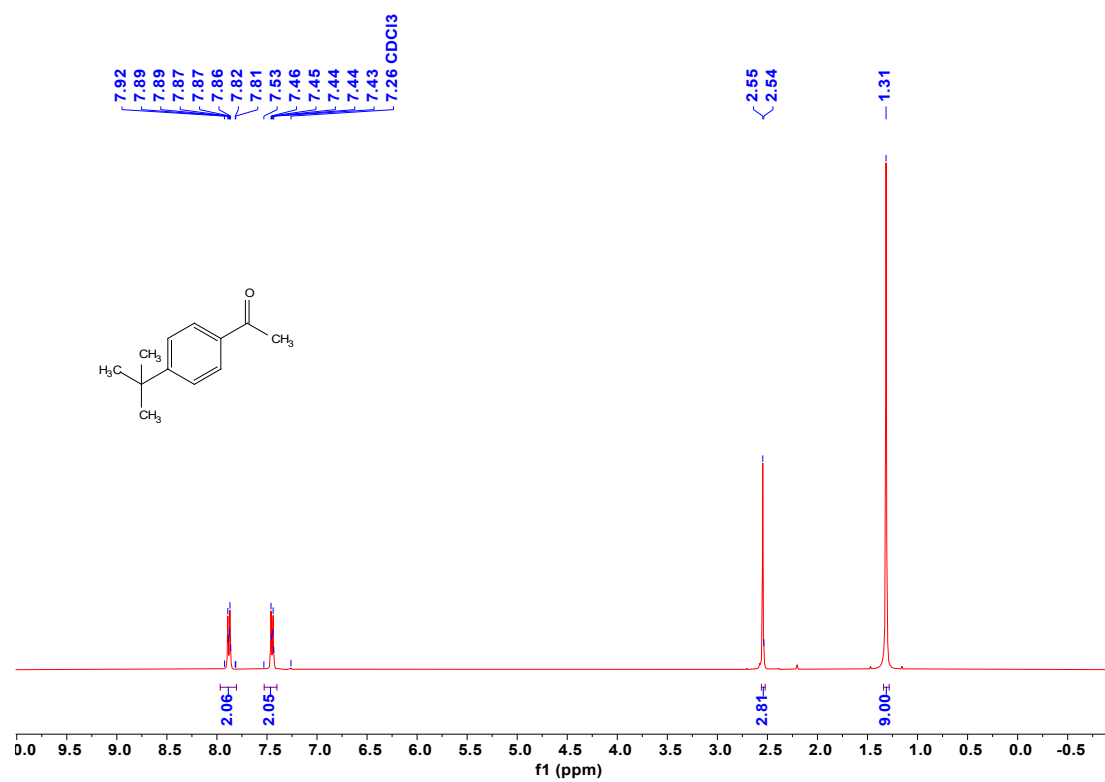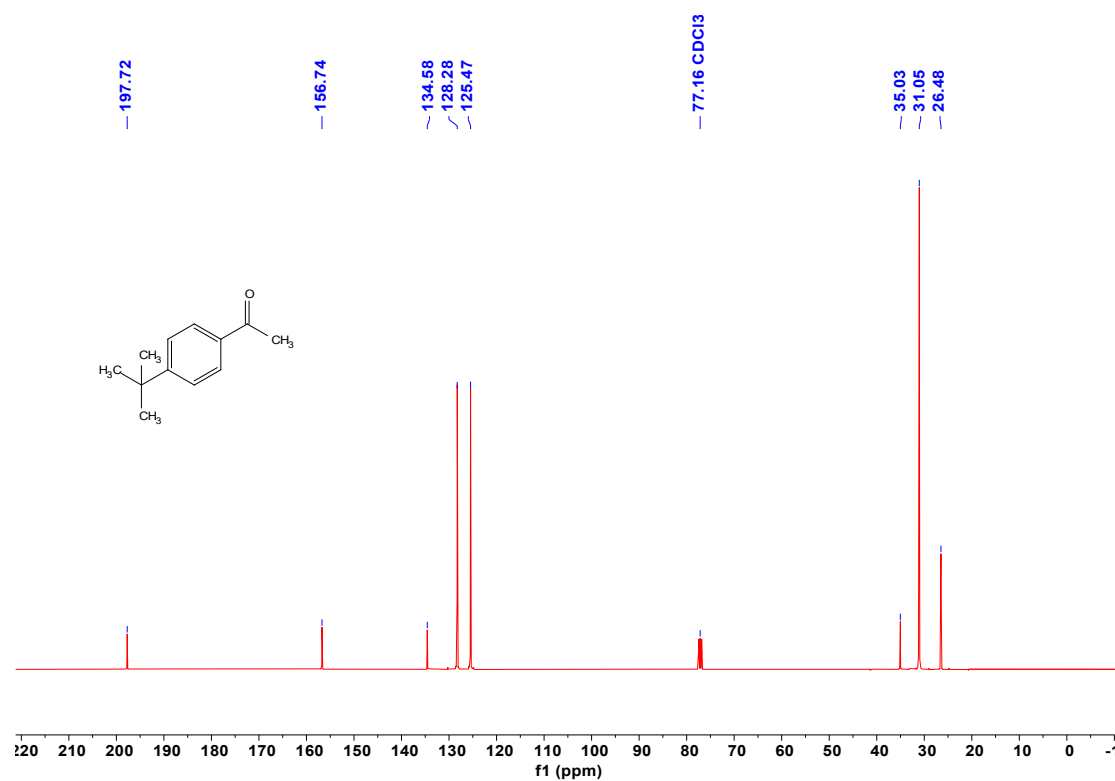

2h

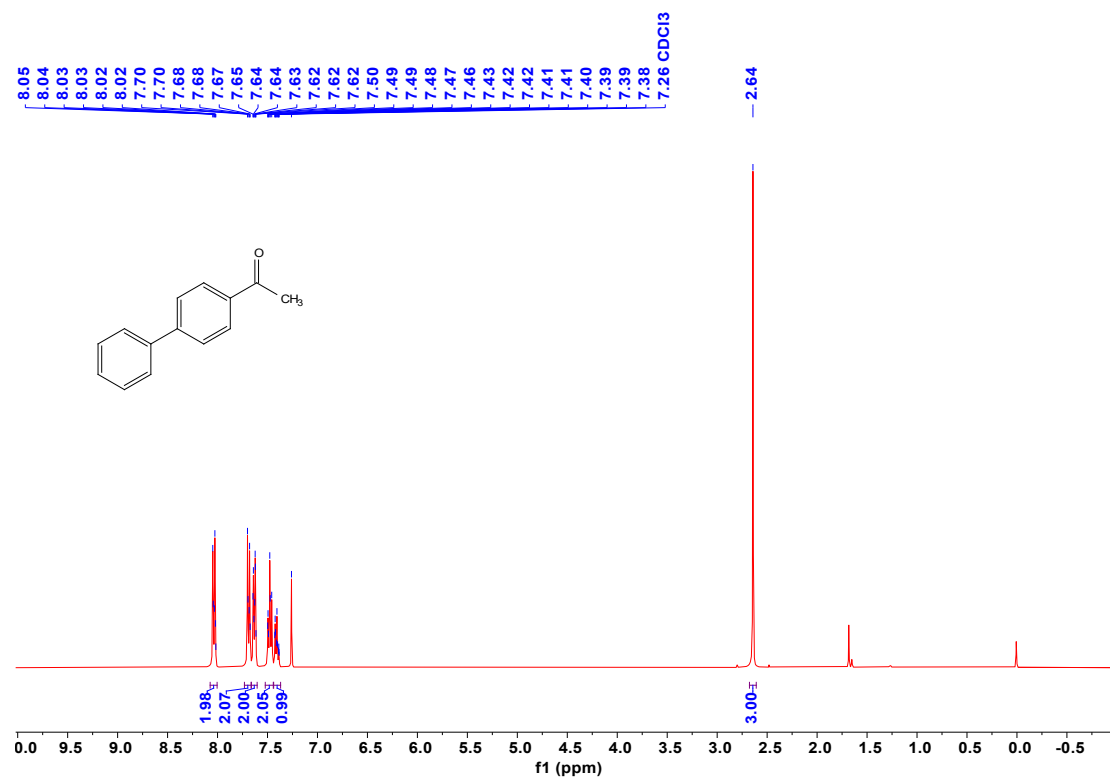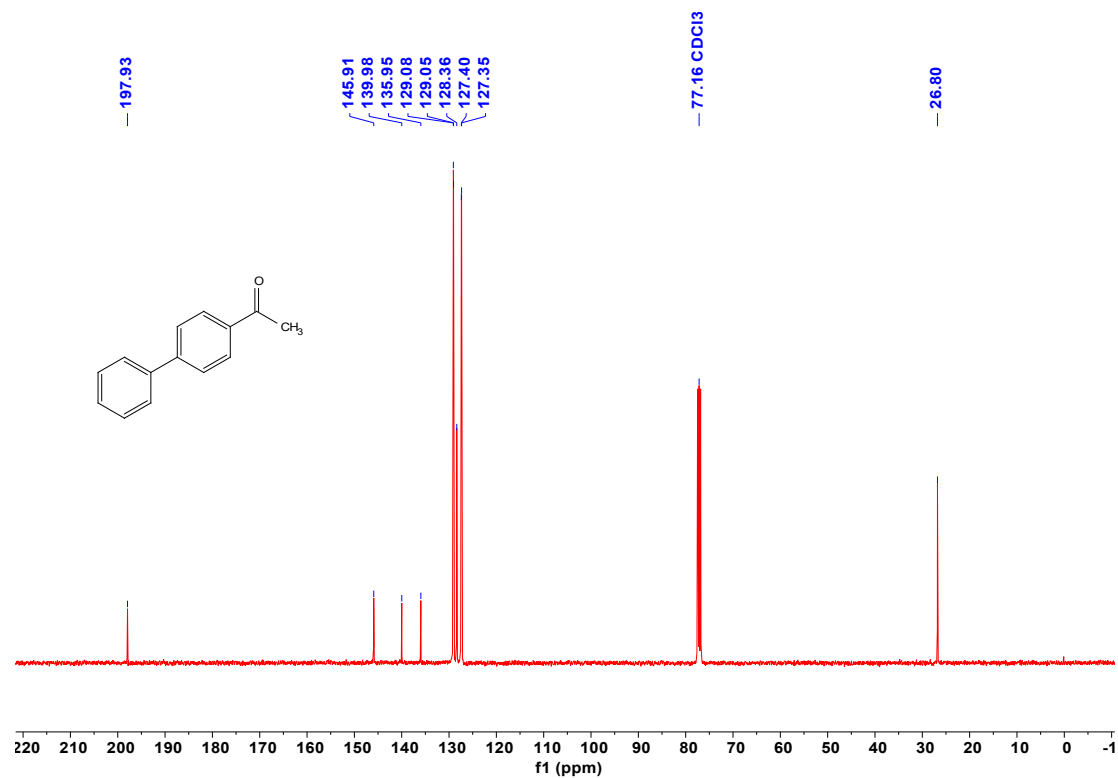



2i

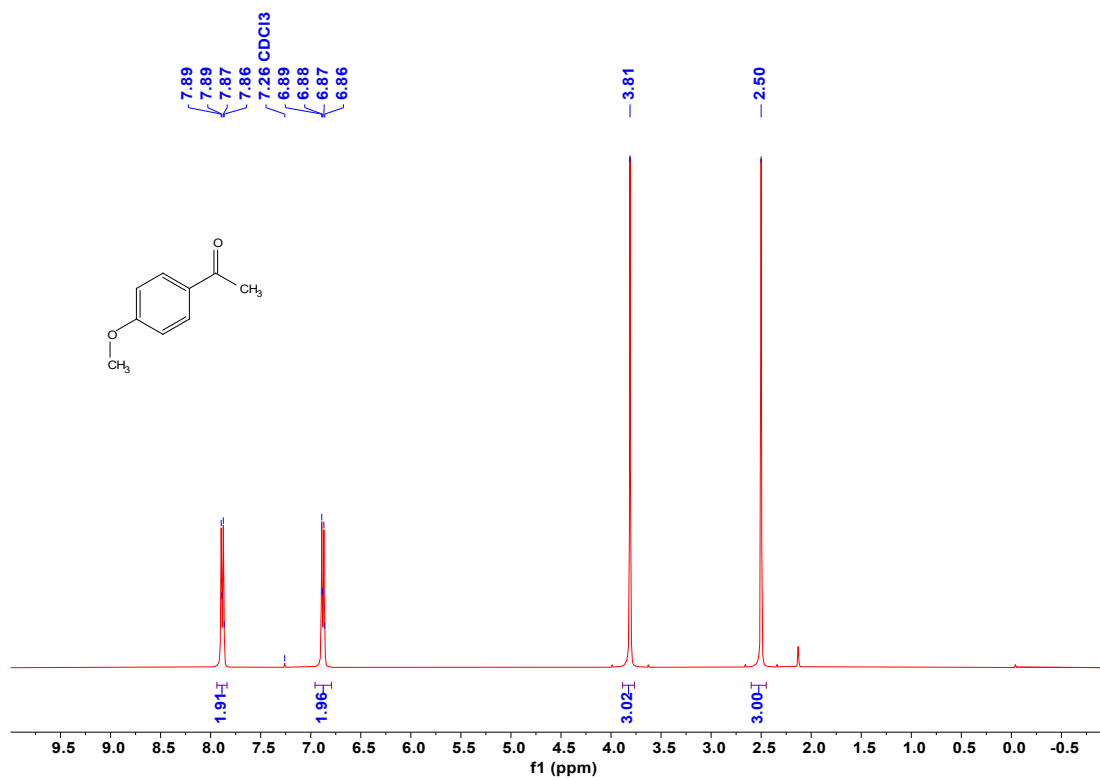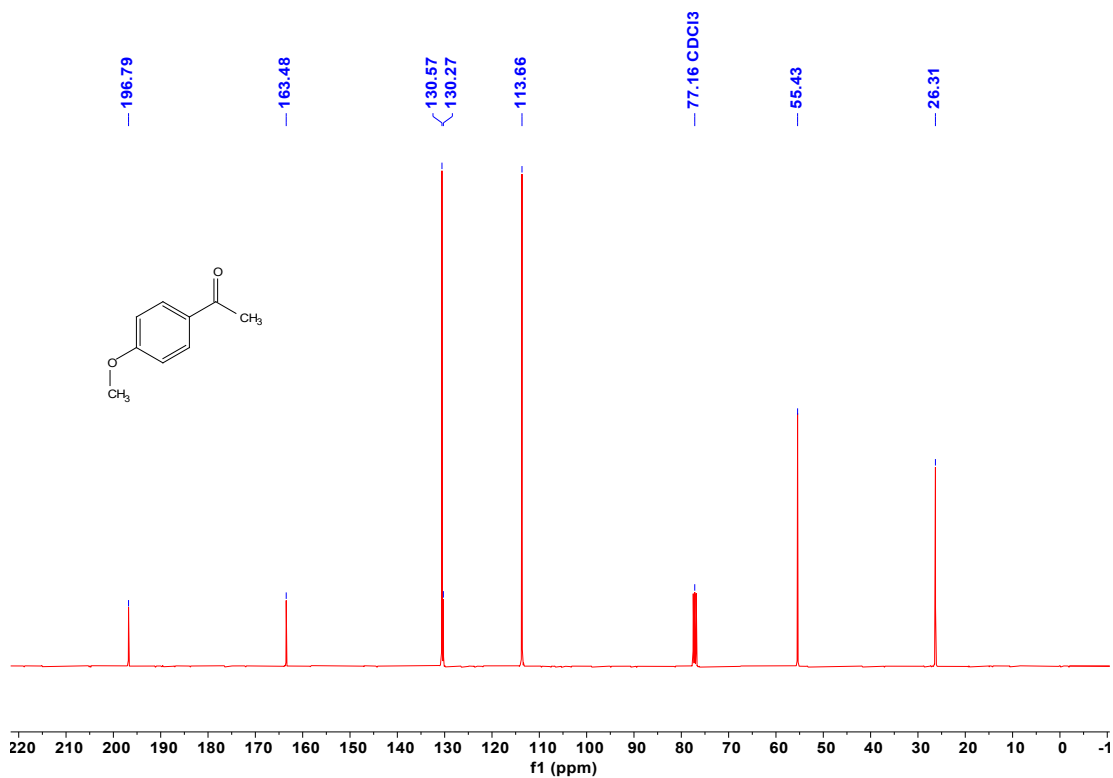

2j

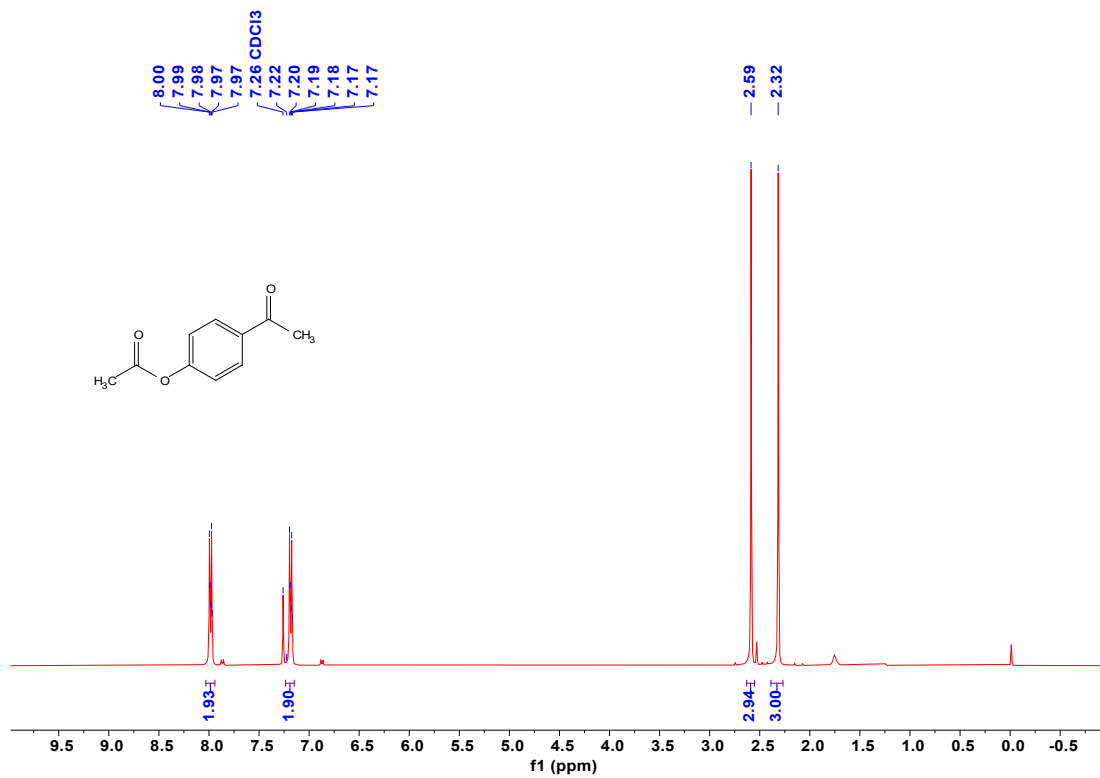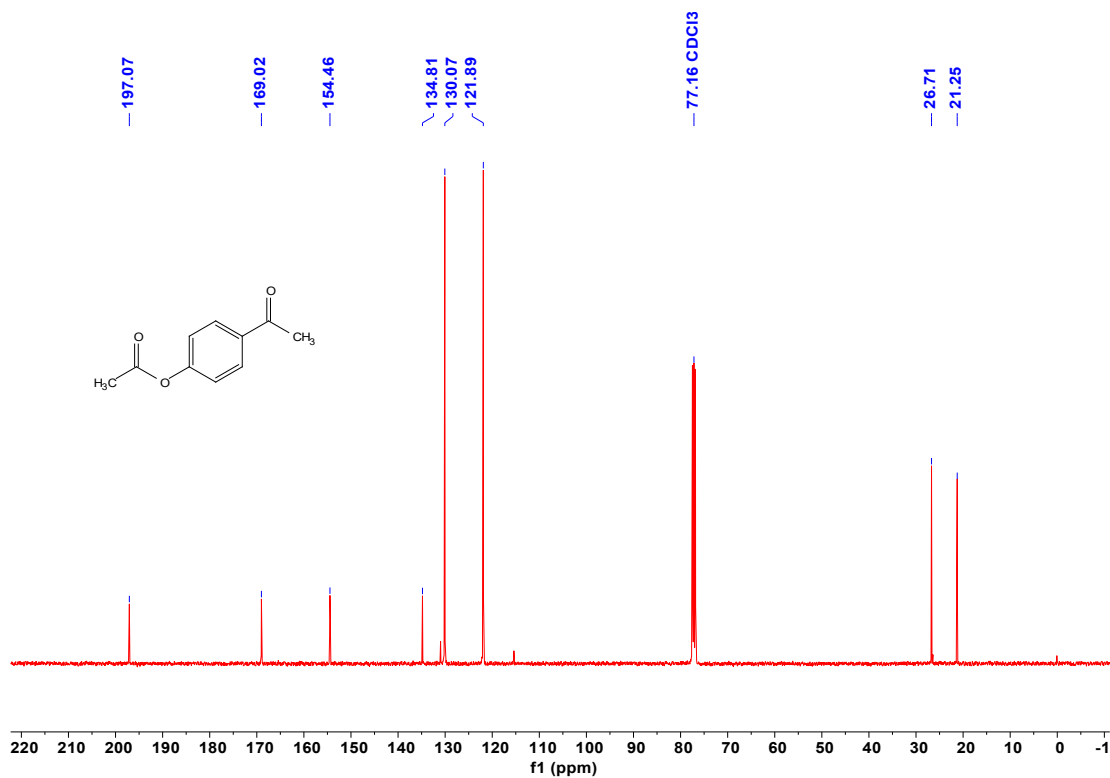

2k

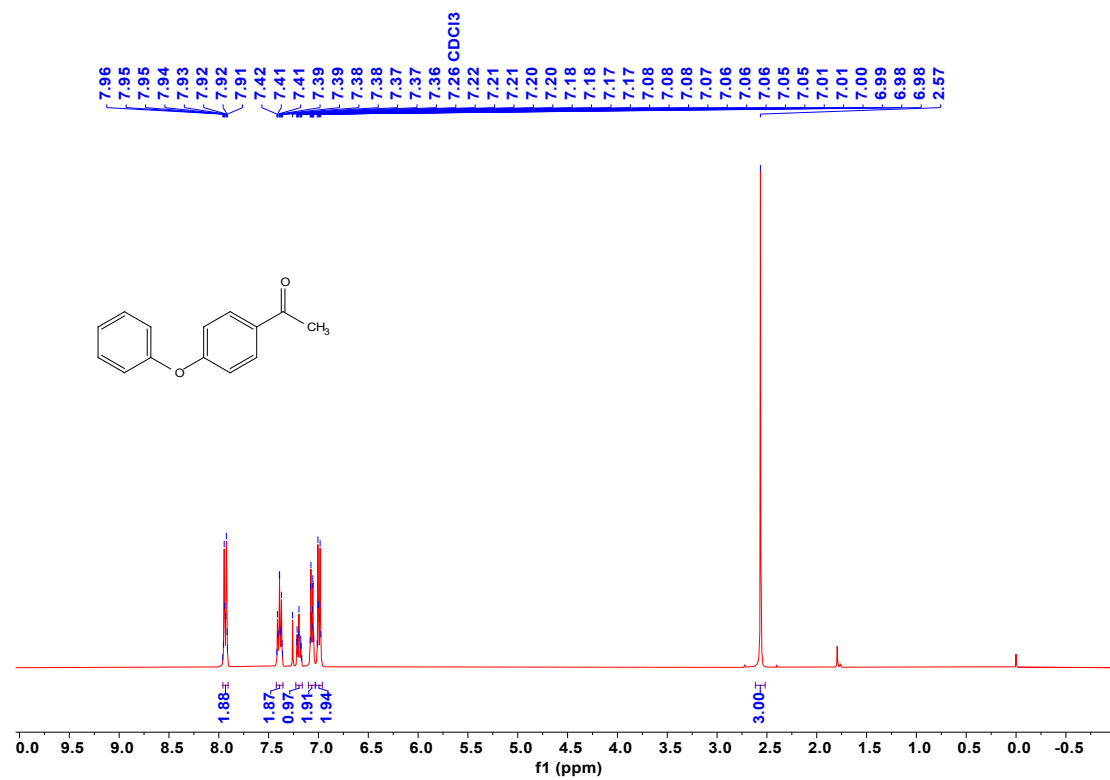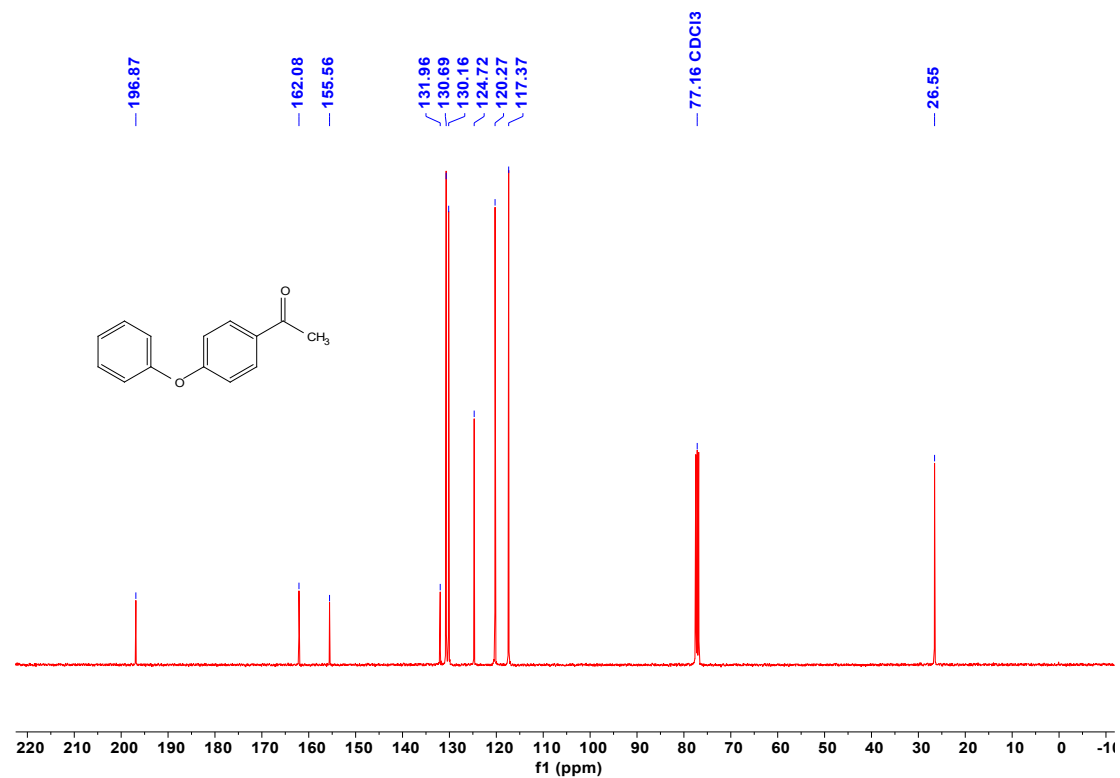

21

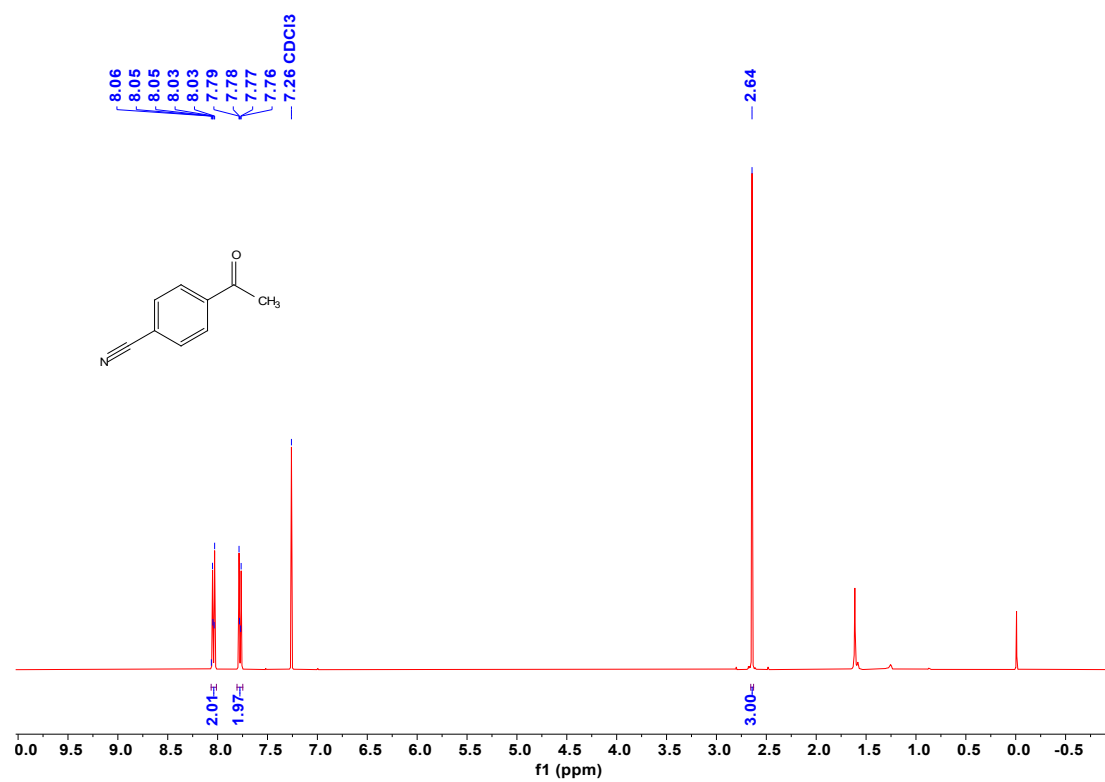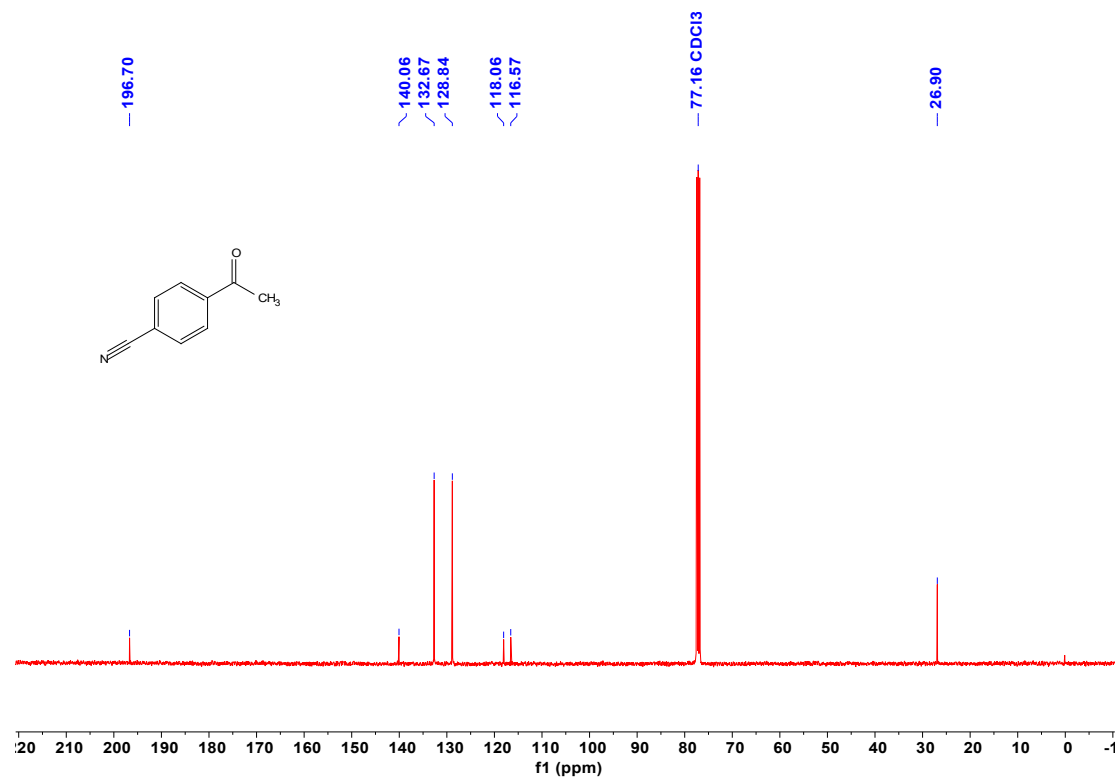

2m

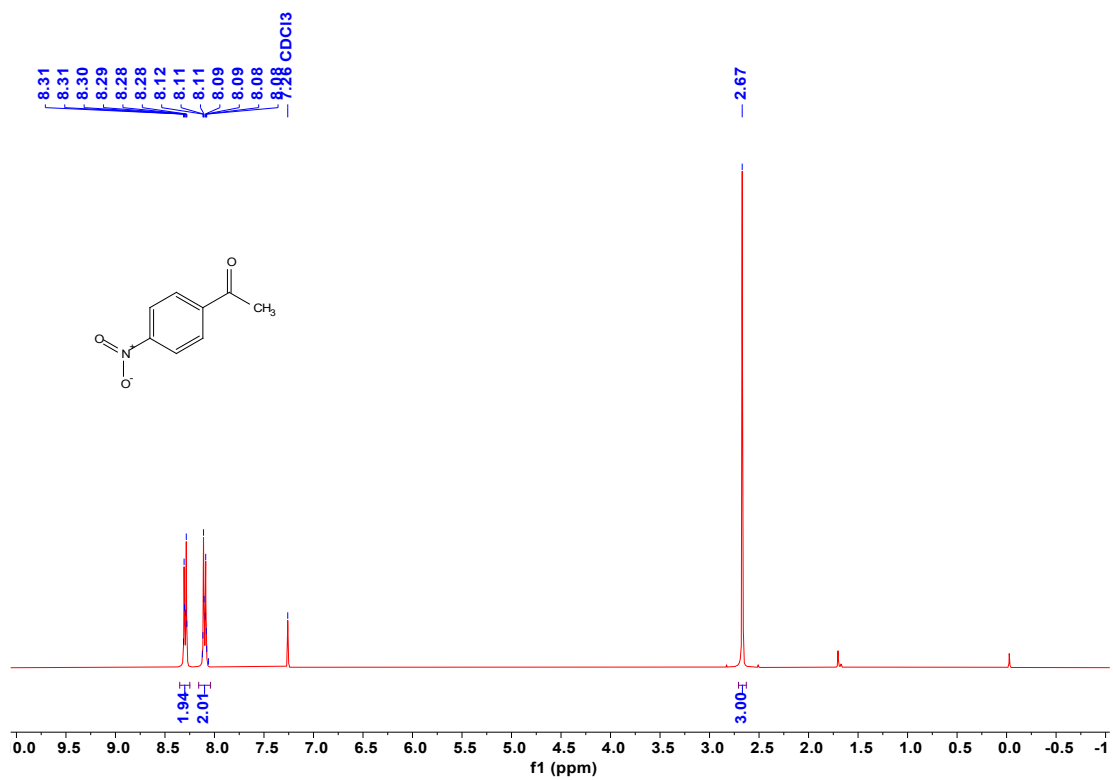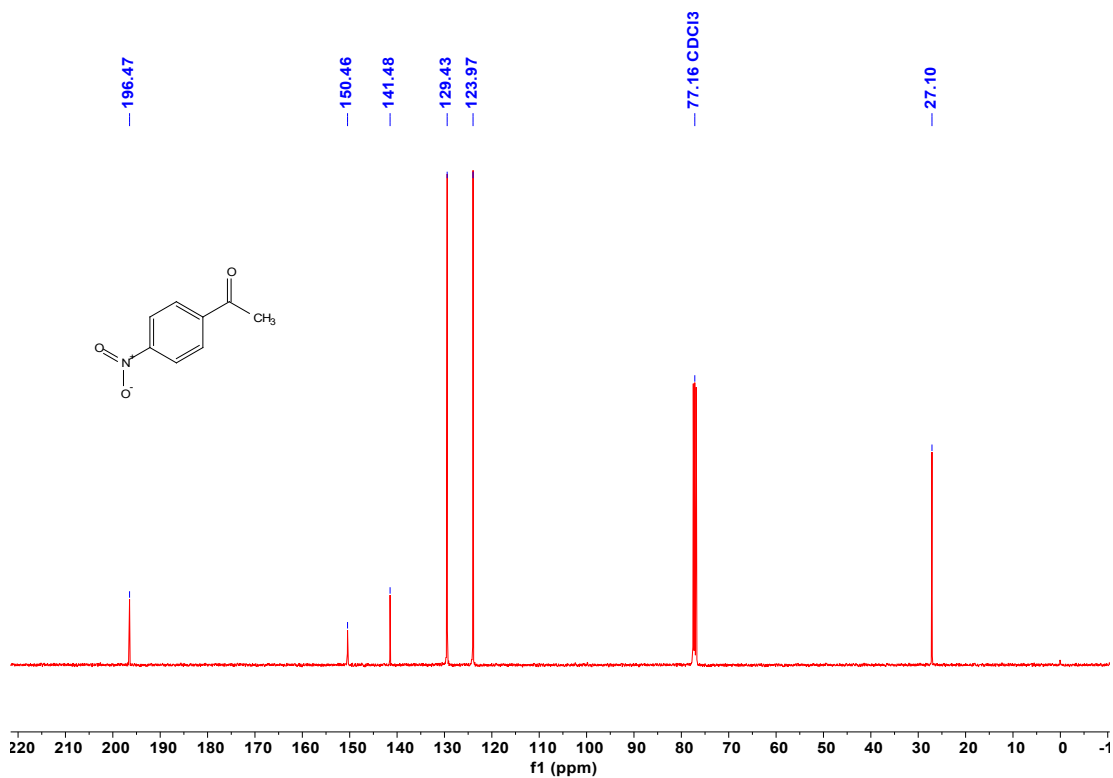

2n

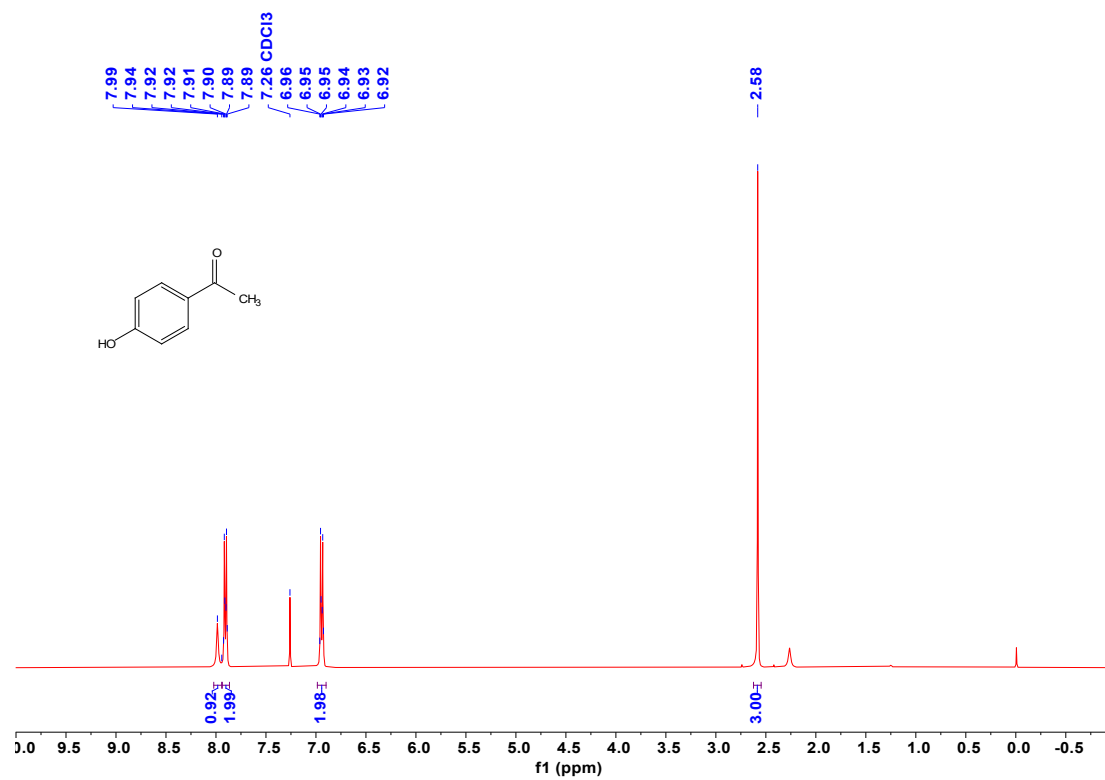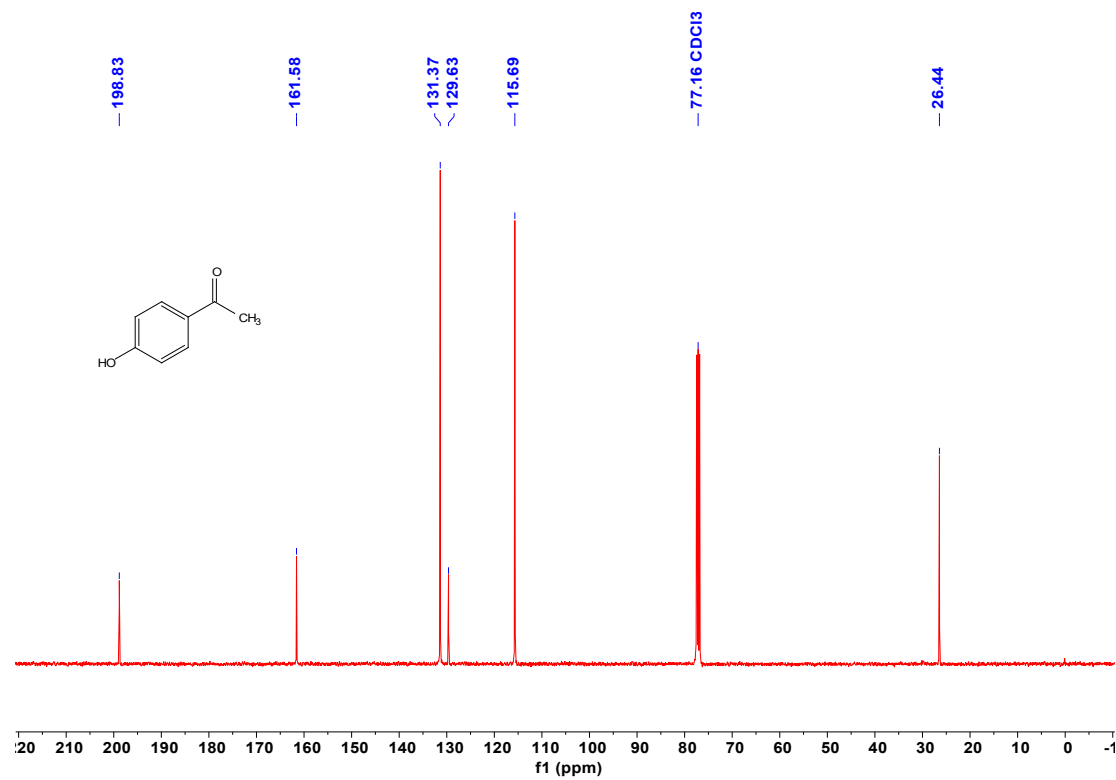

20

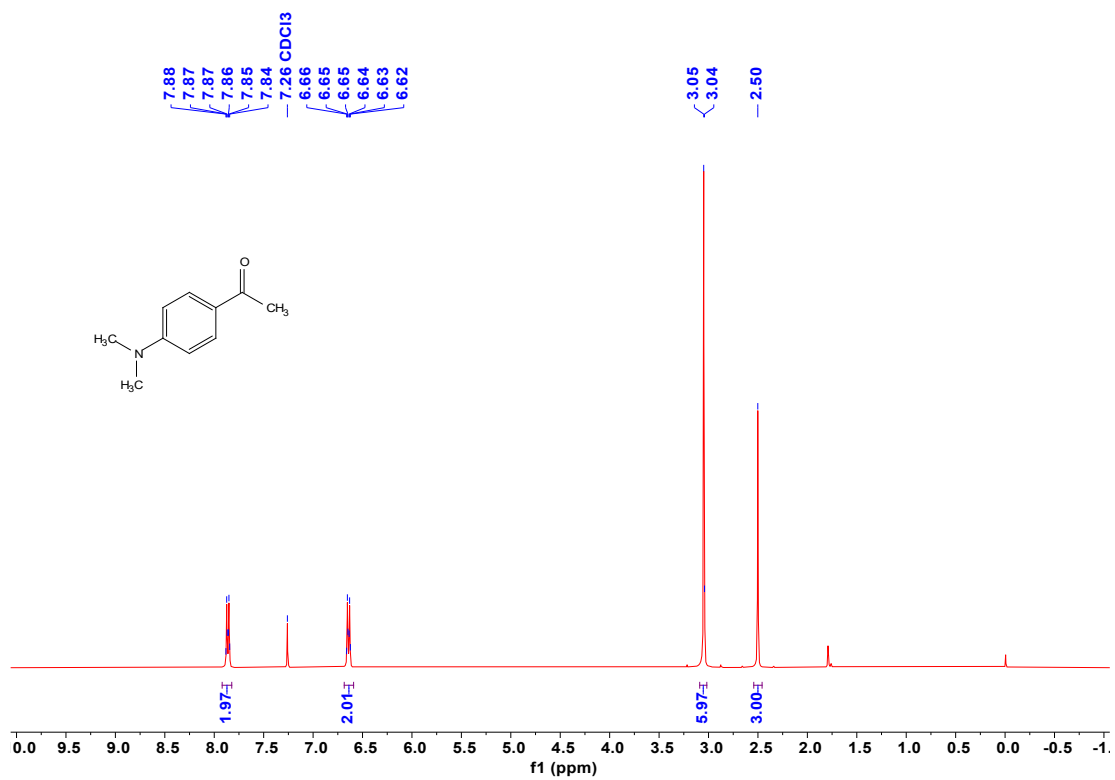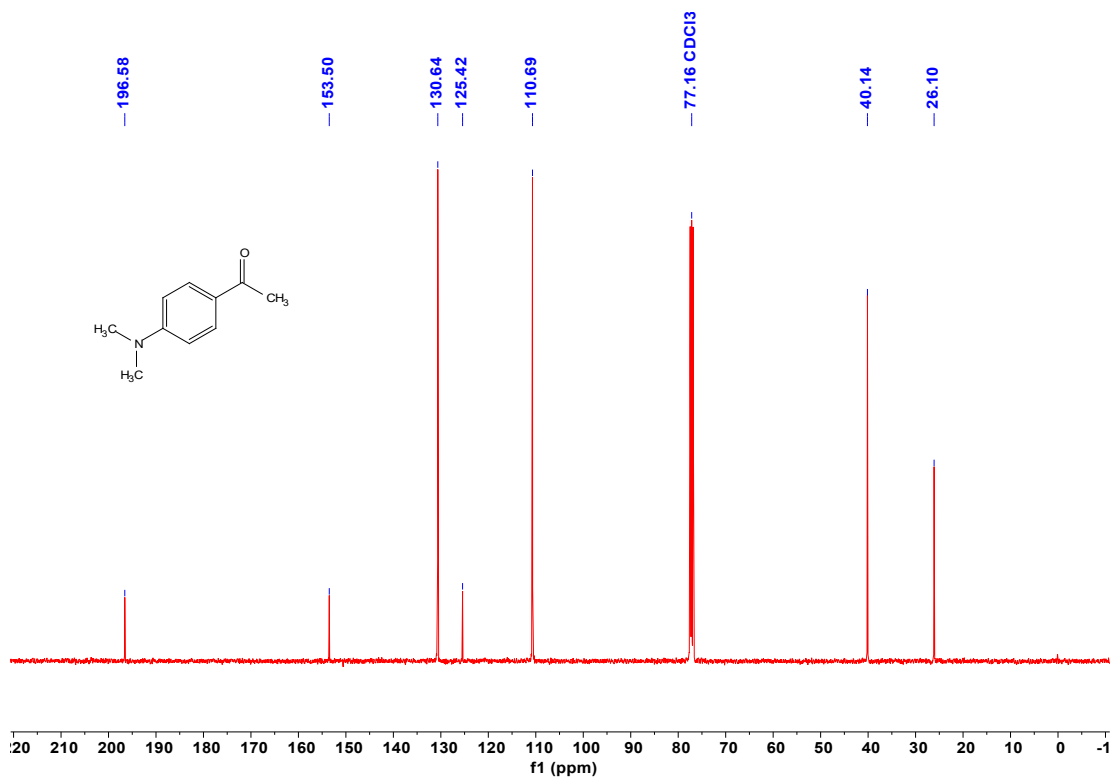

2q

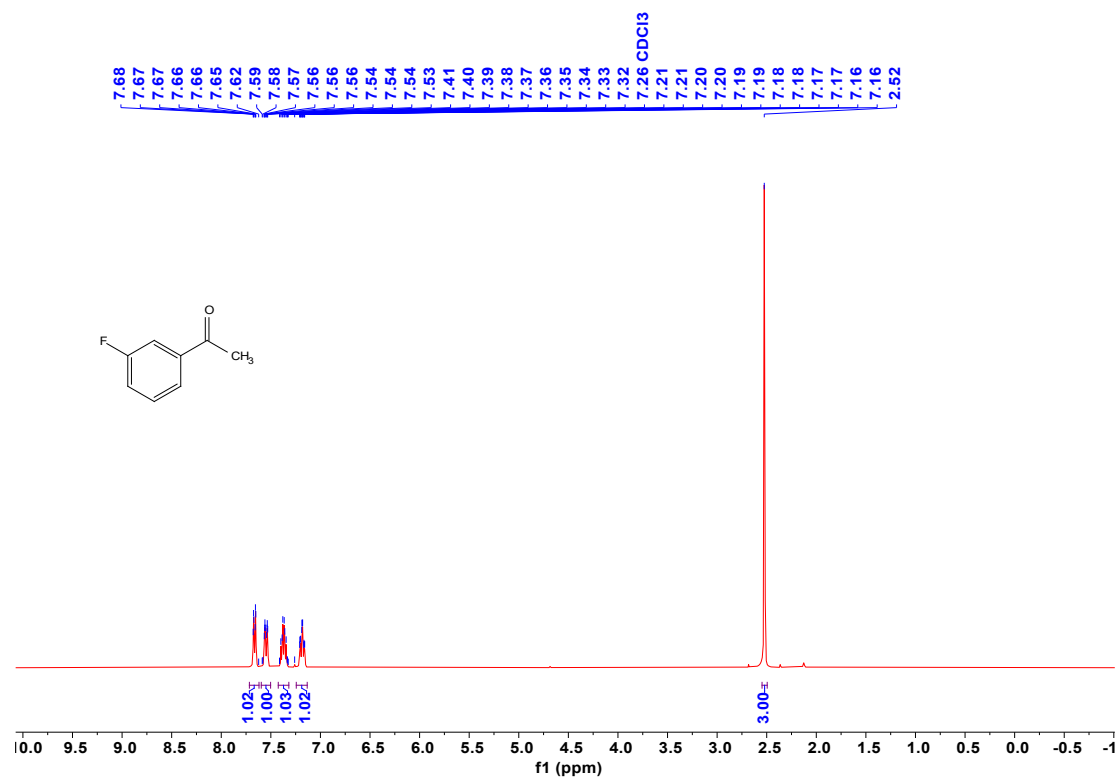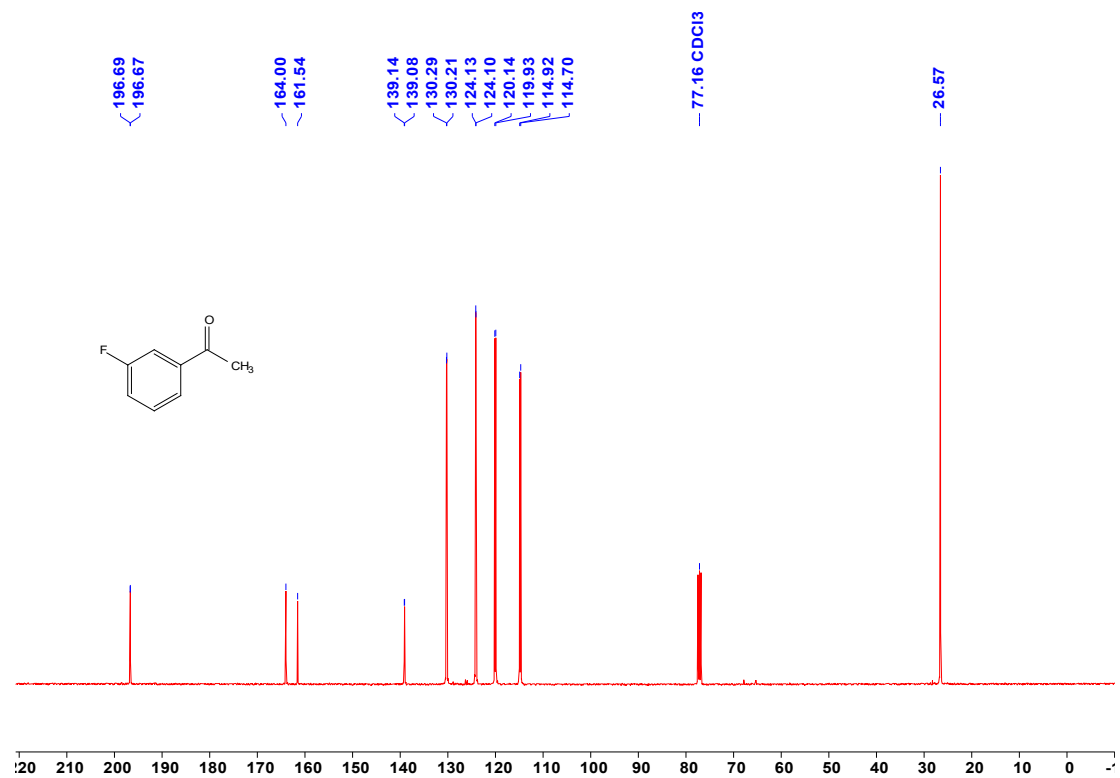



2r

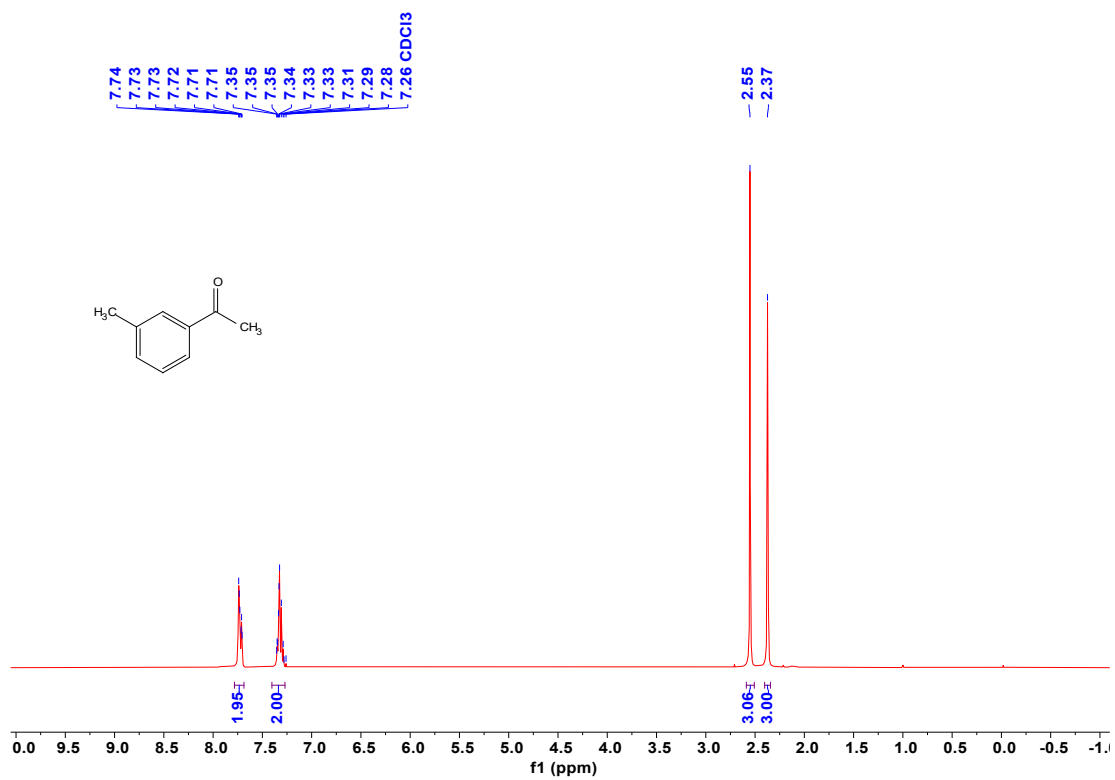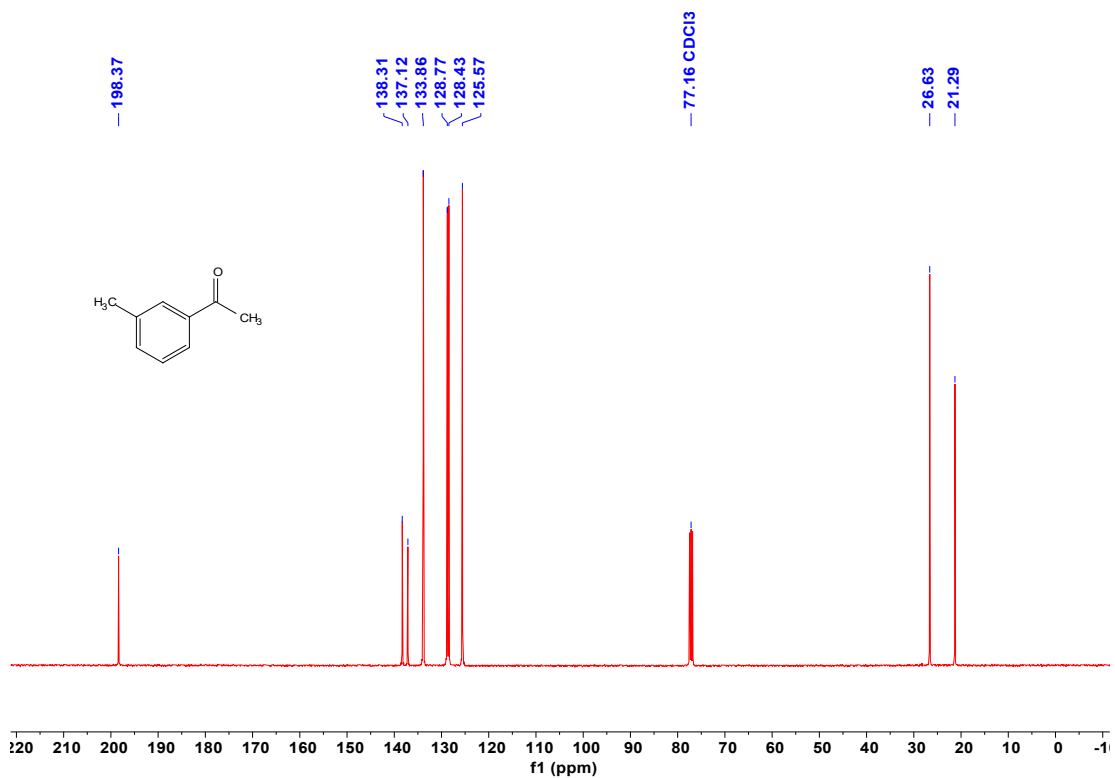

2s

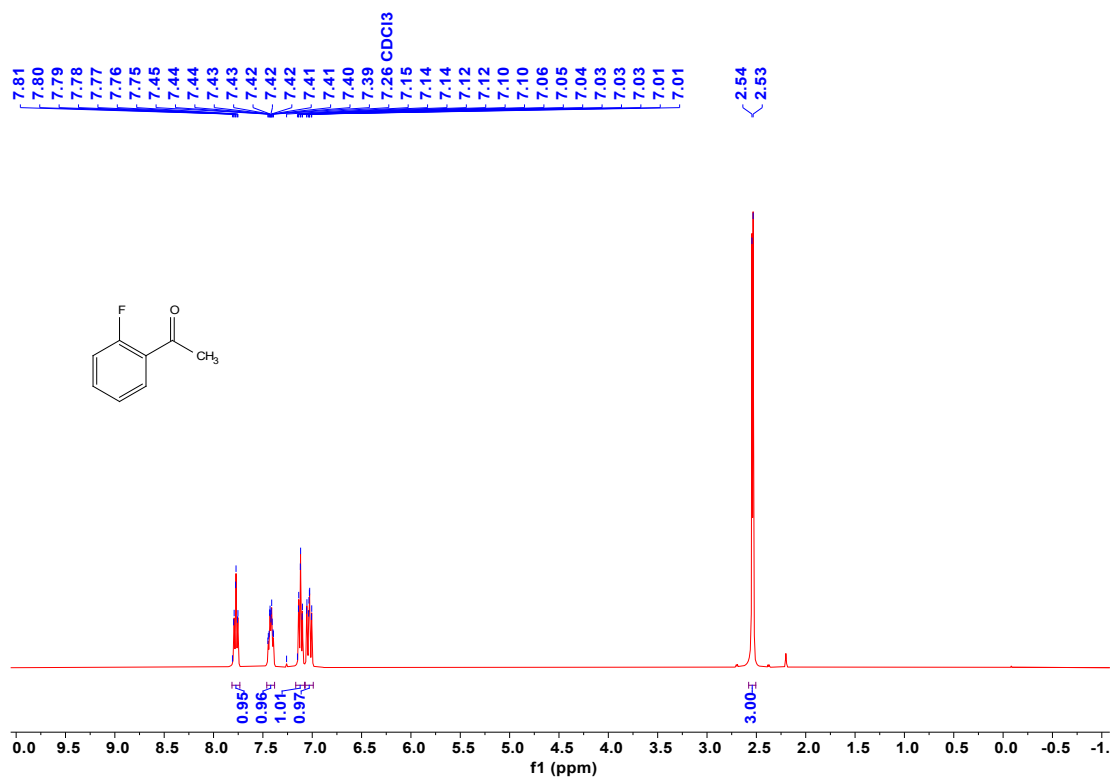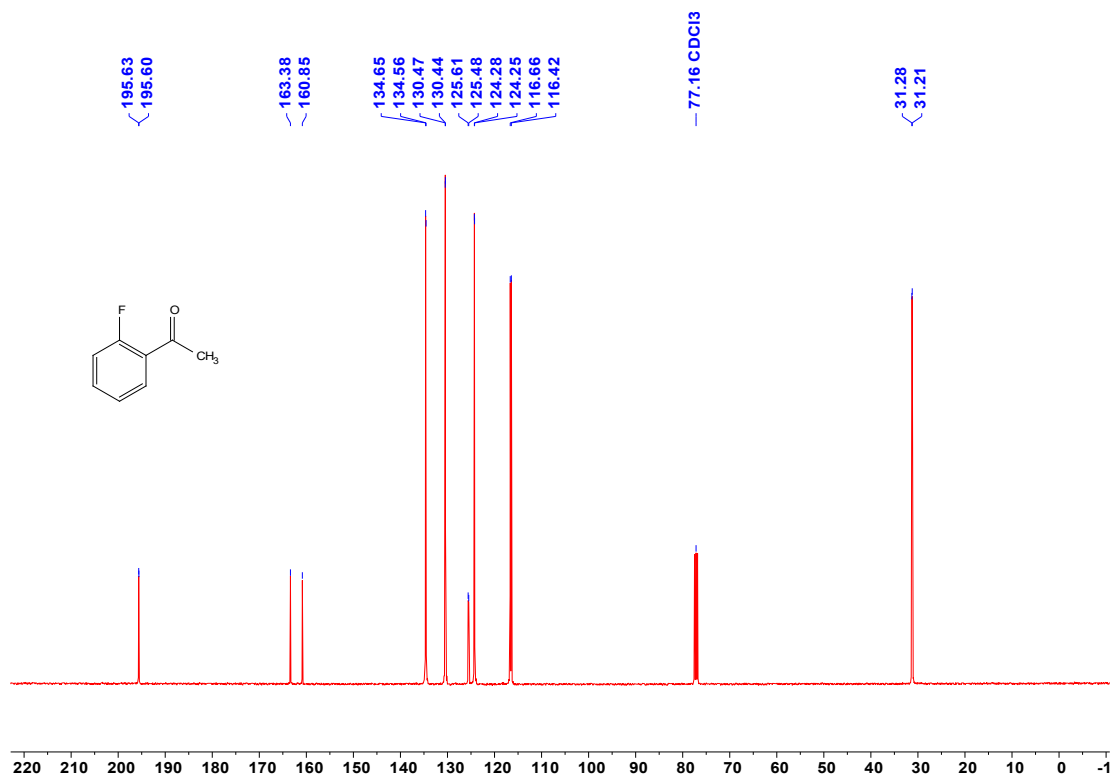

2t

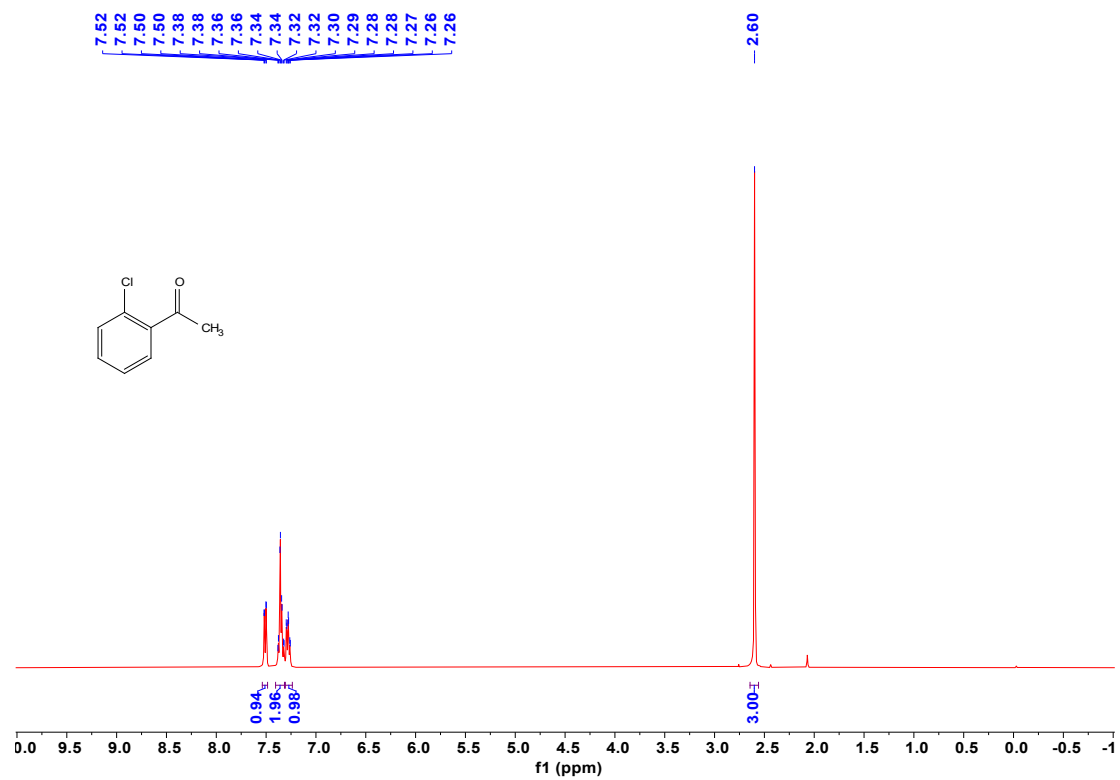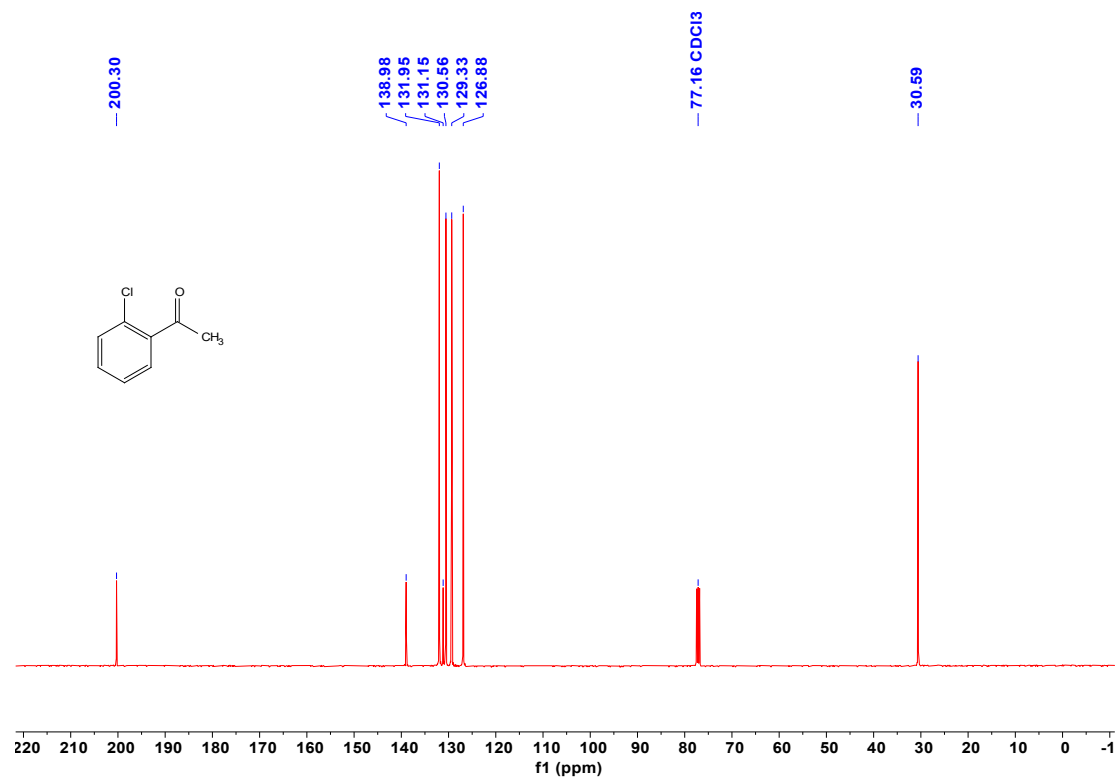

2u

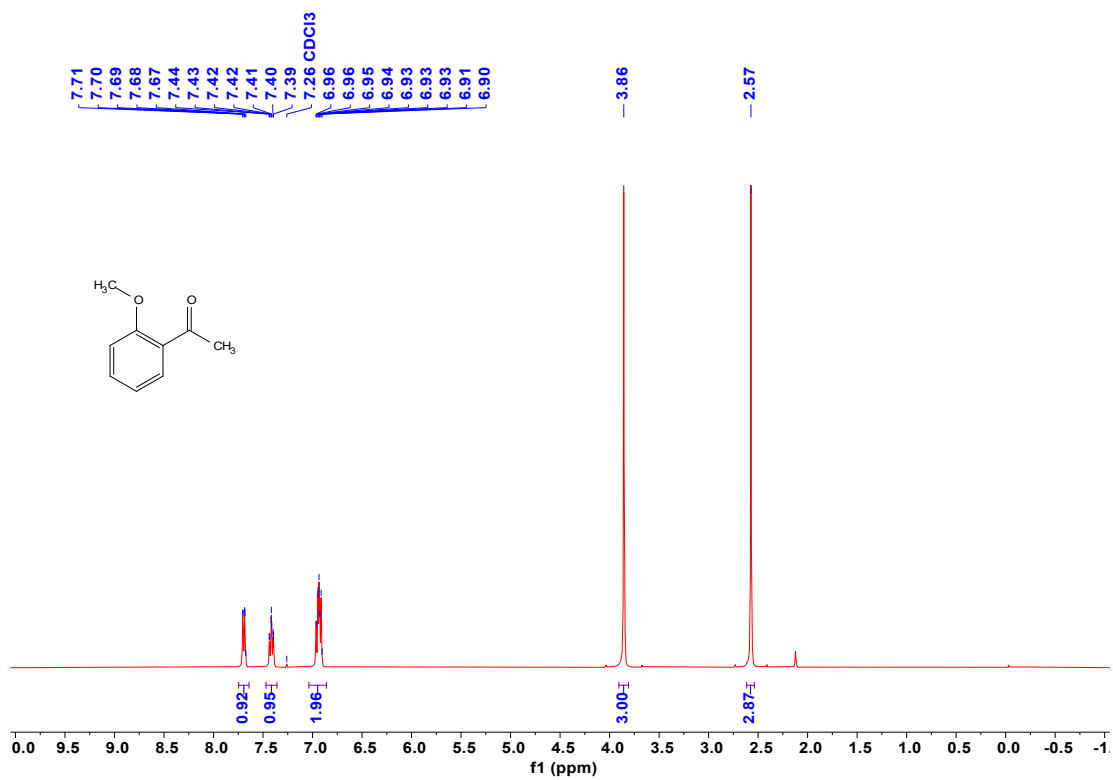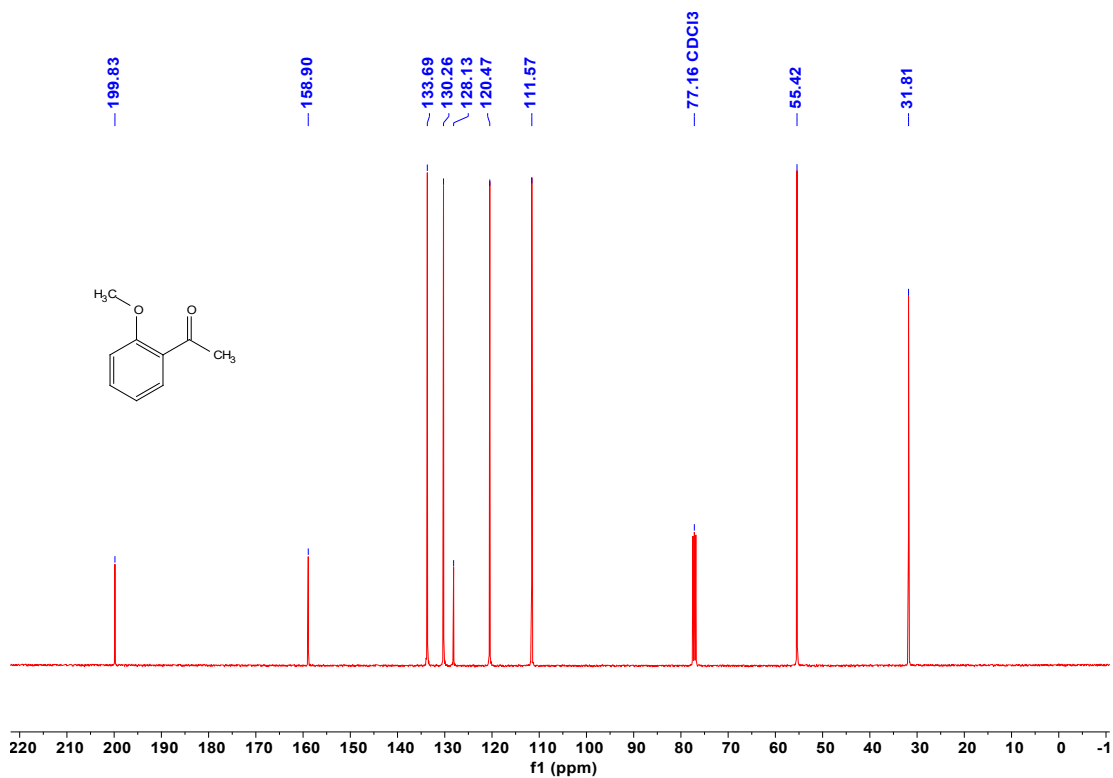

2w

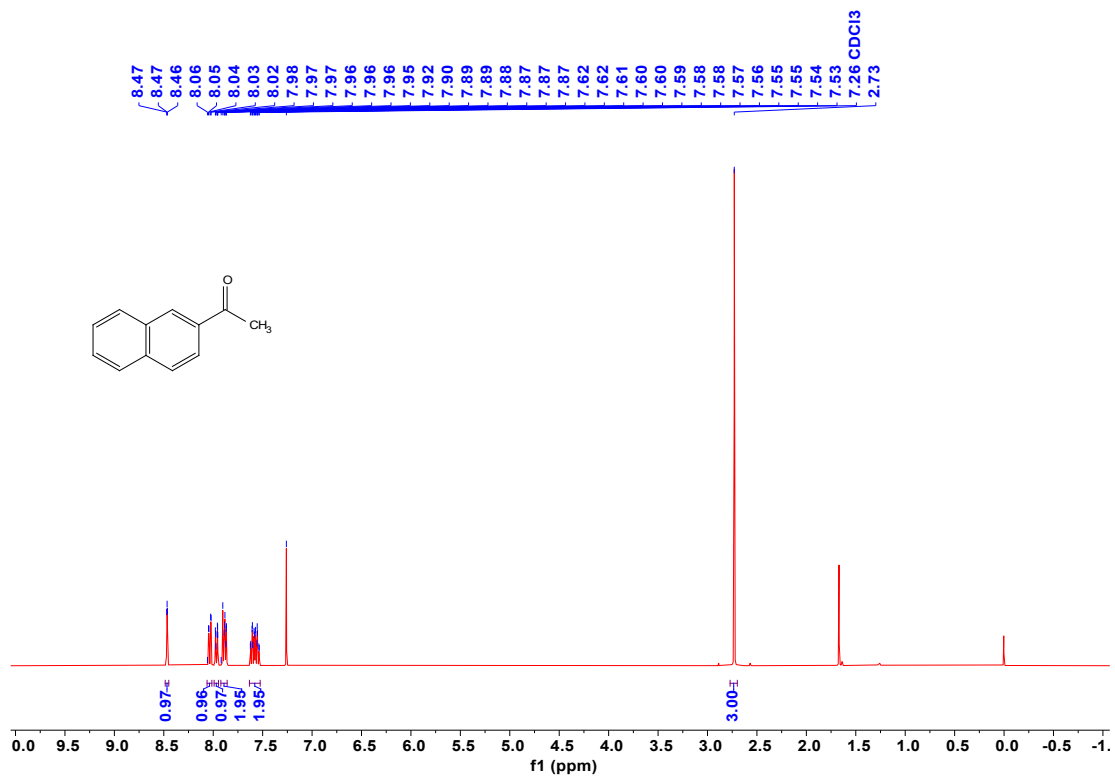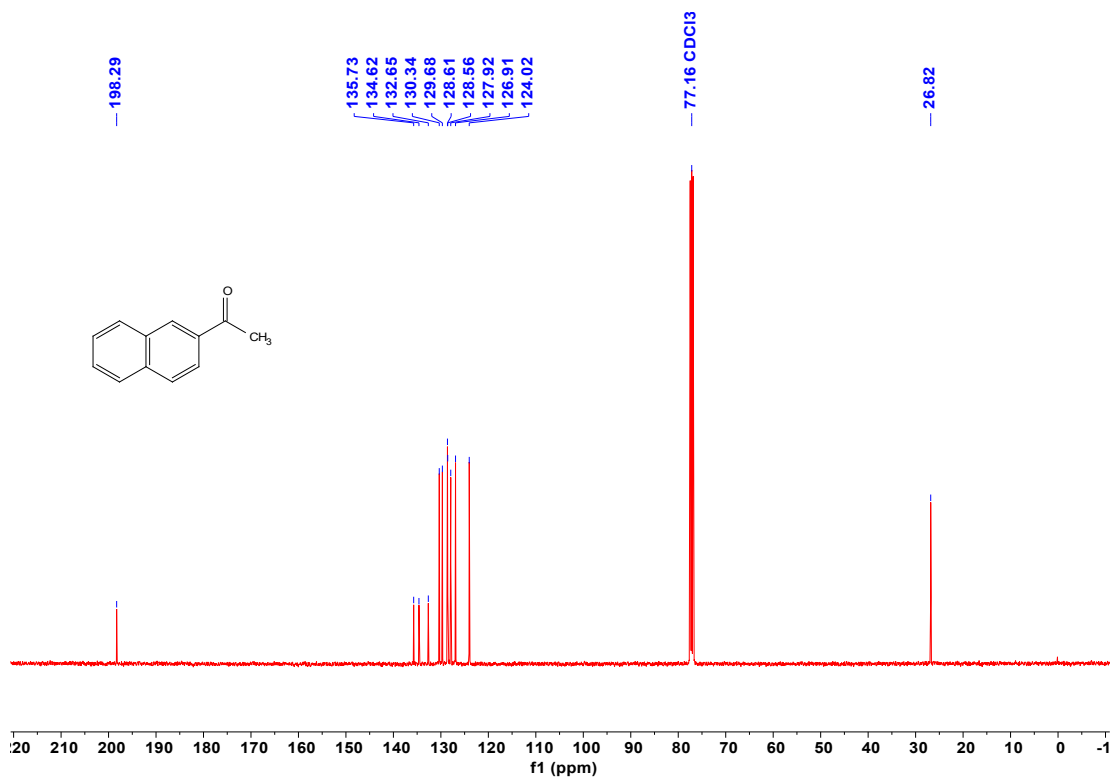

2x

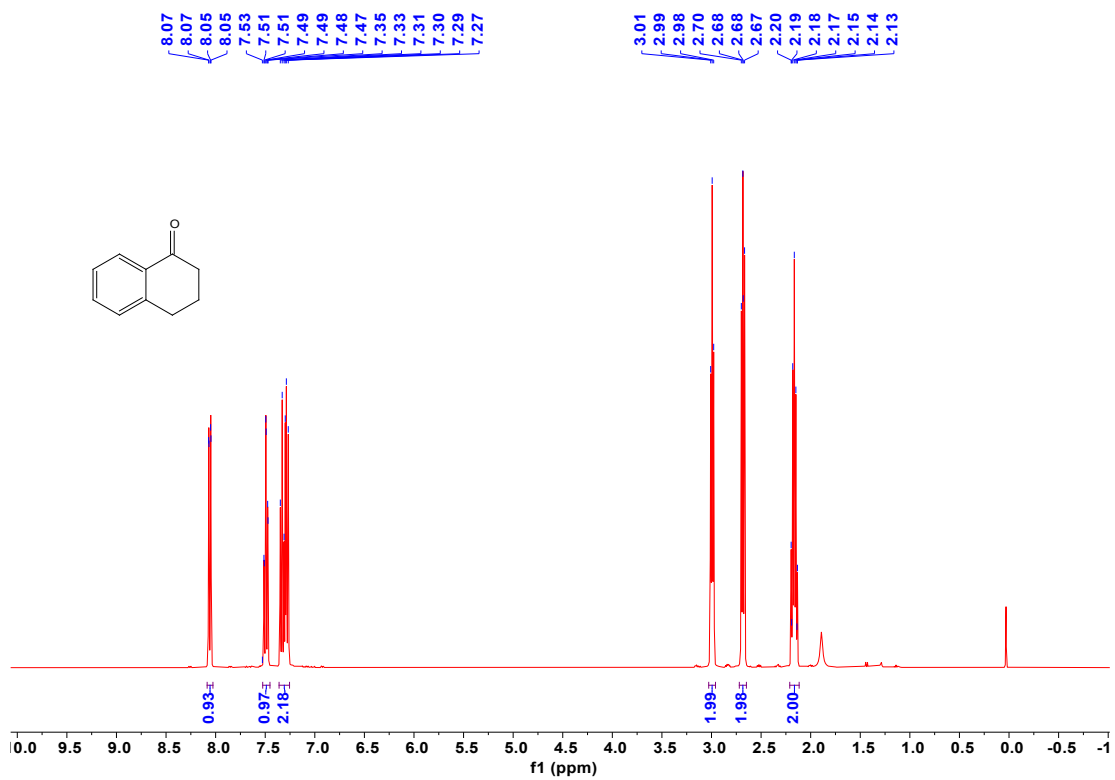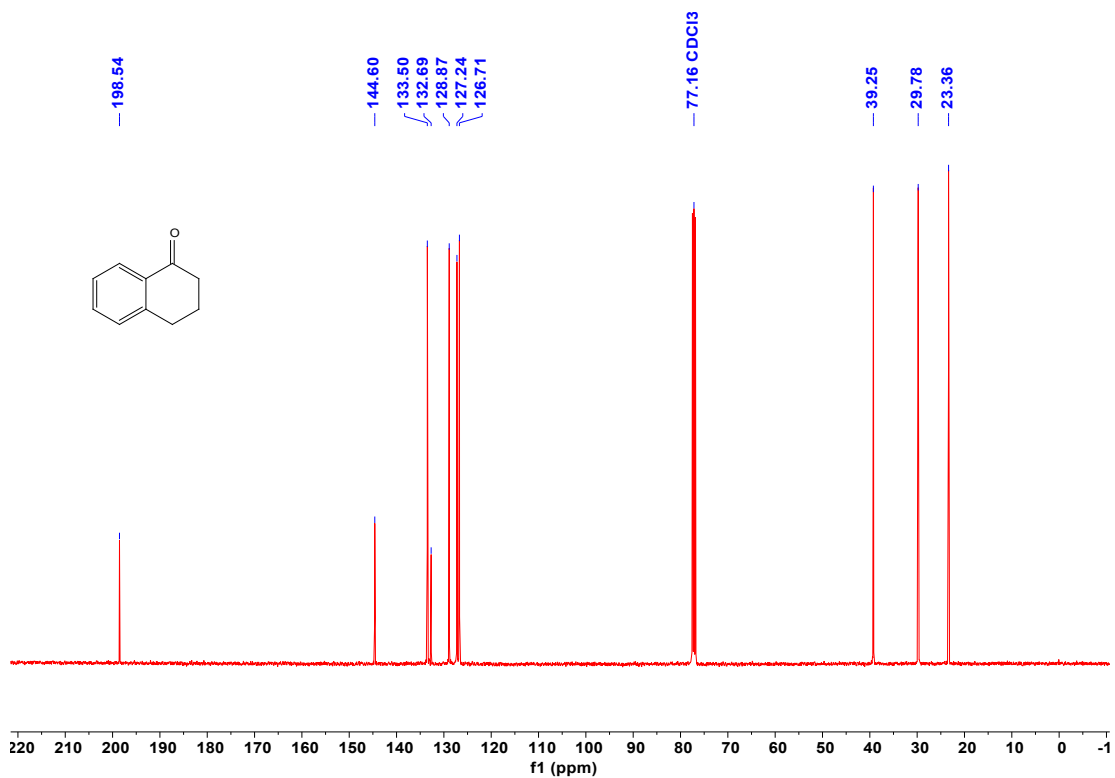

2y

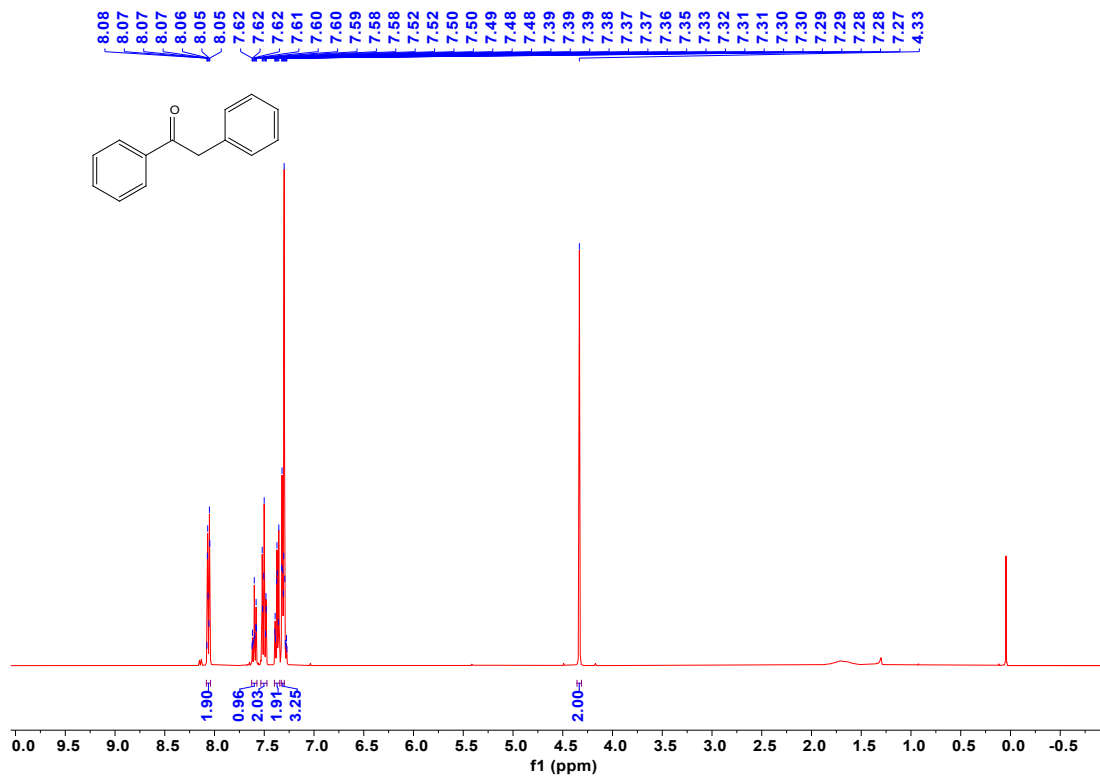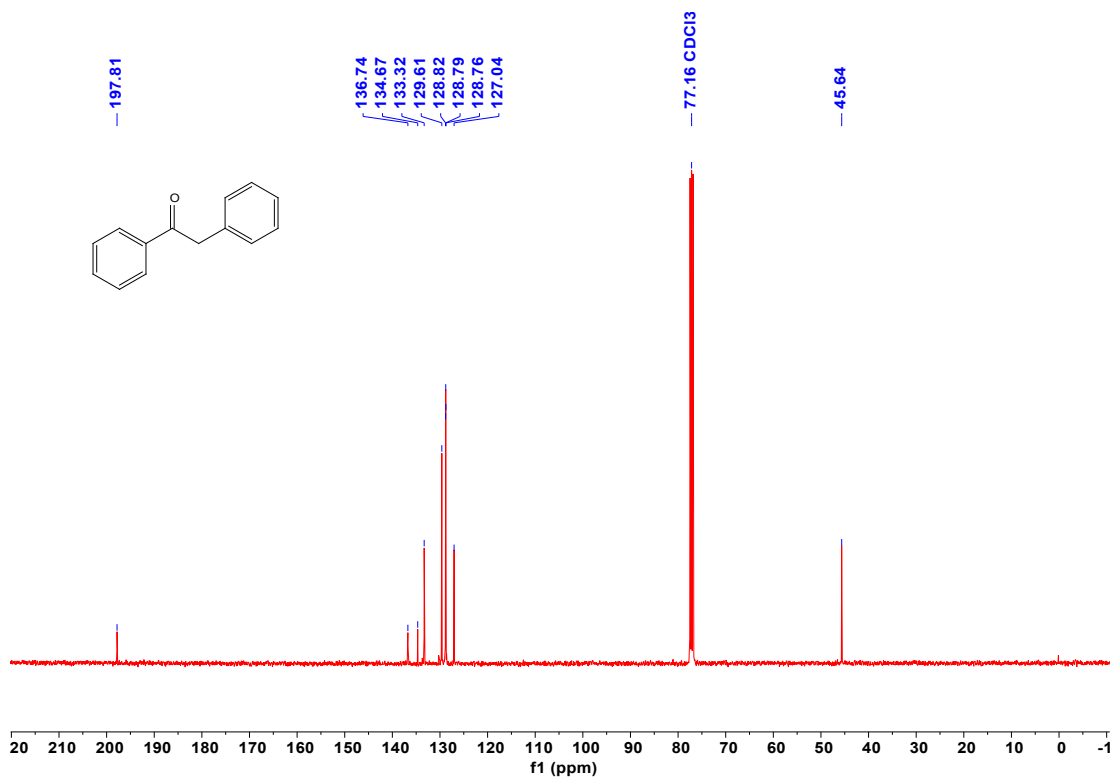

2aa

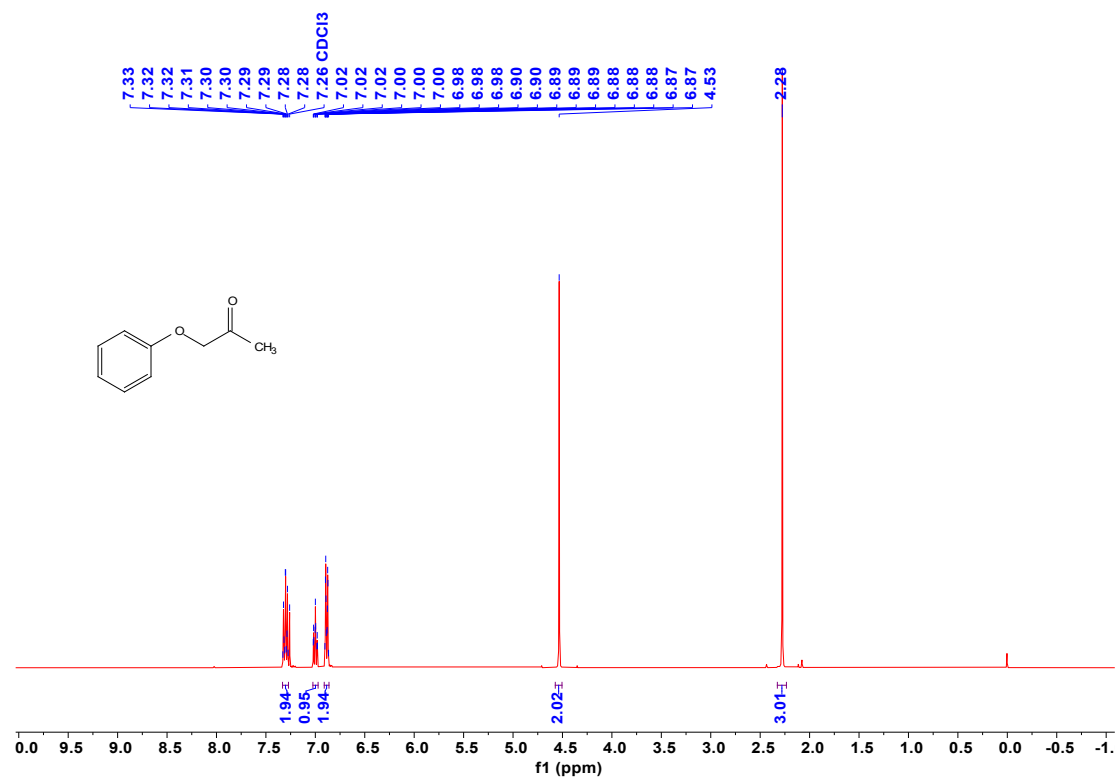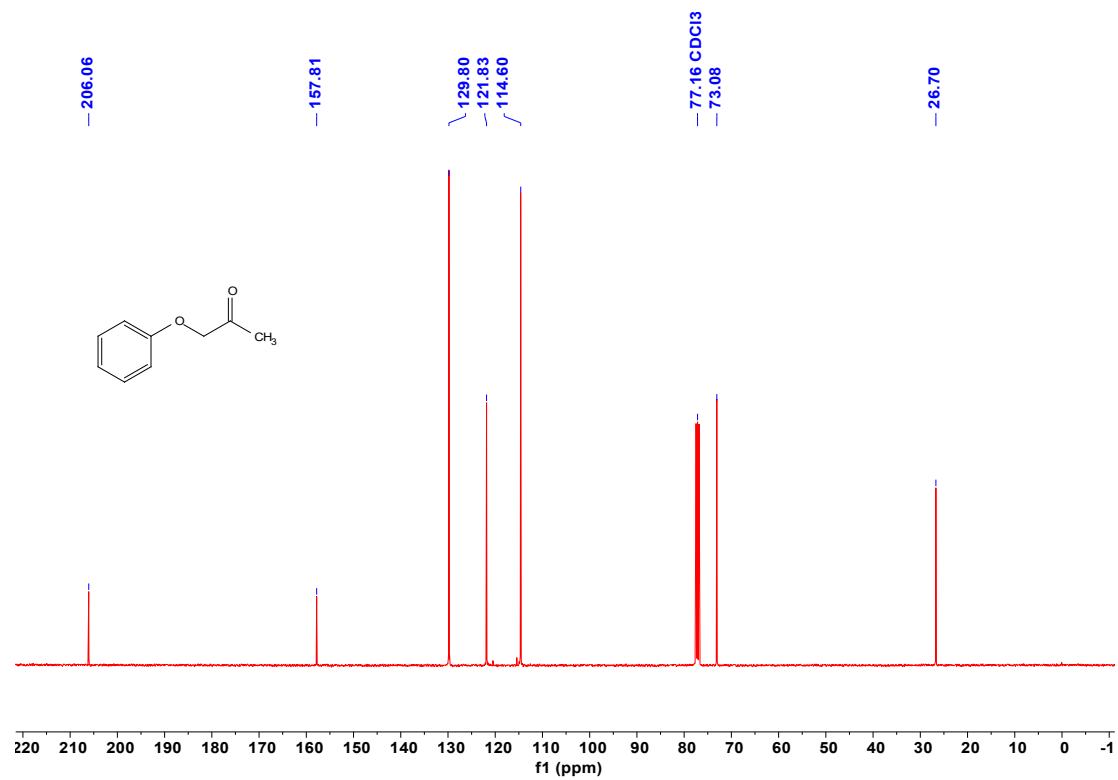



IN1

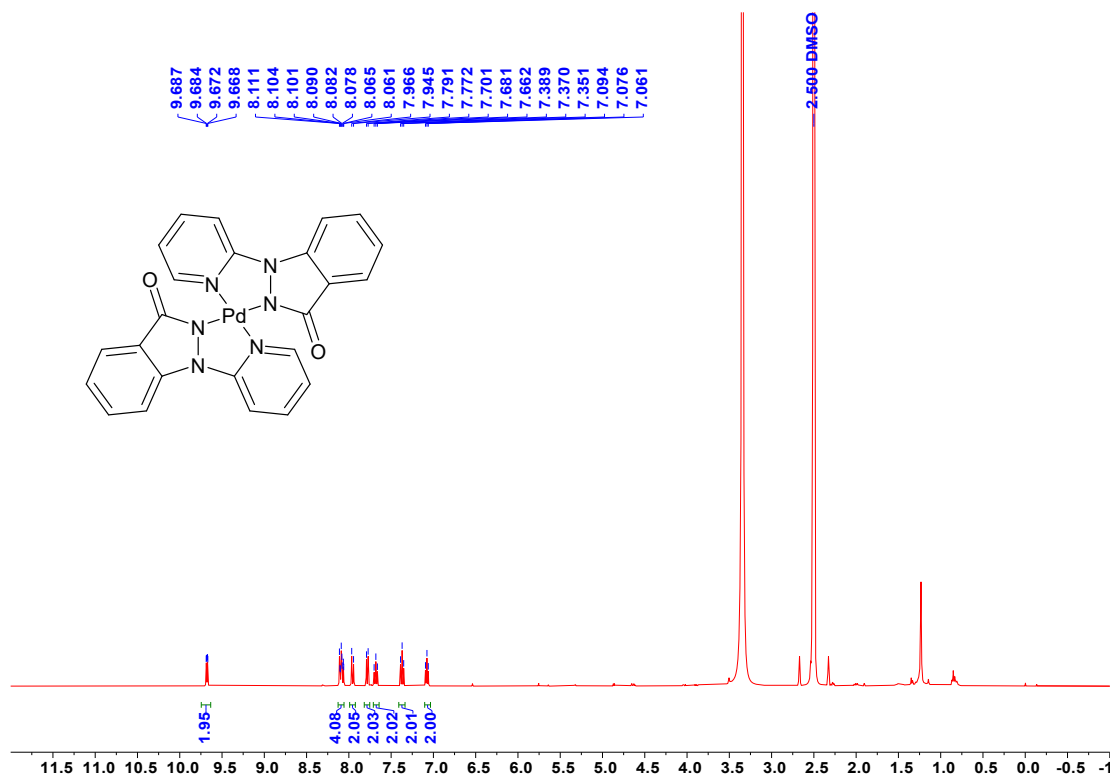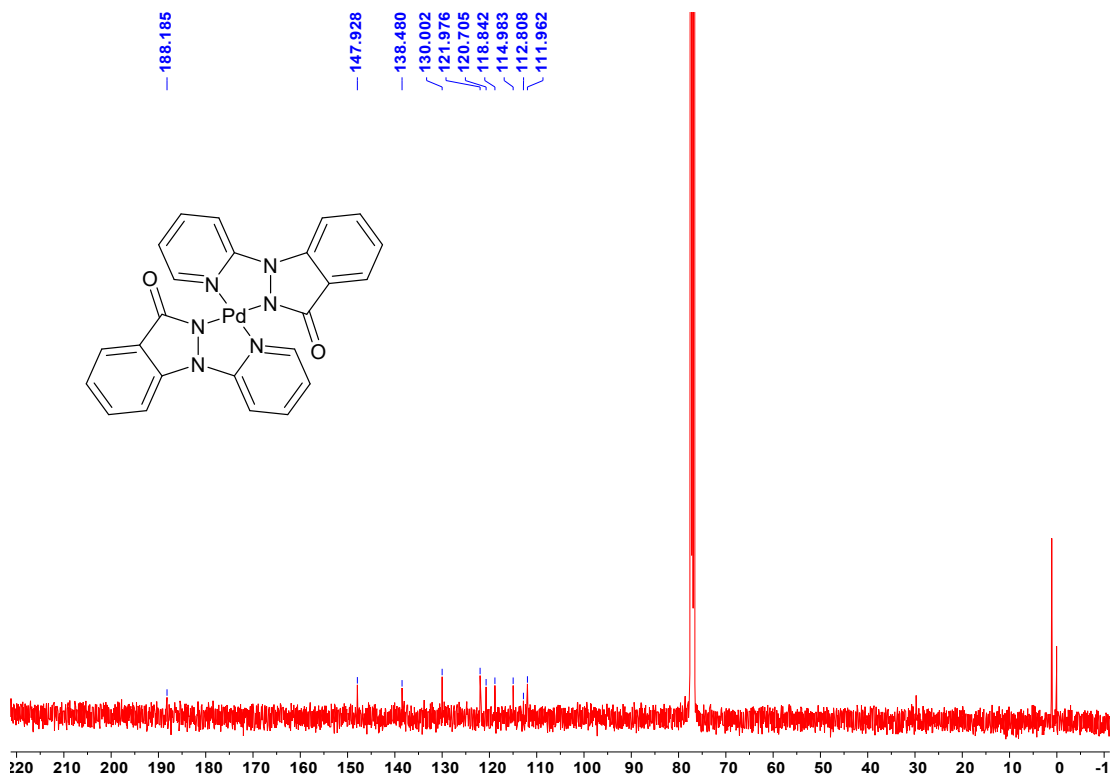

# IN2

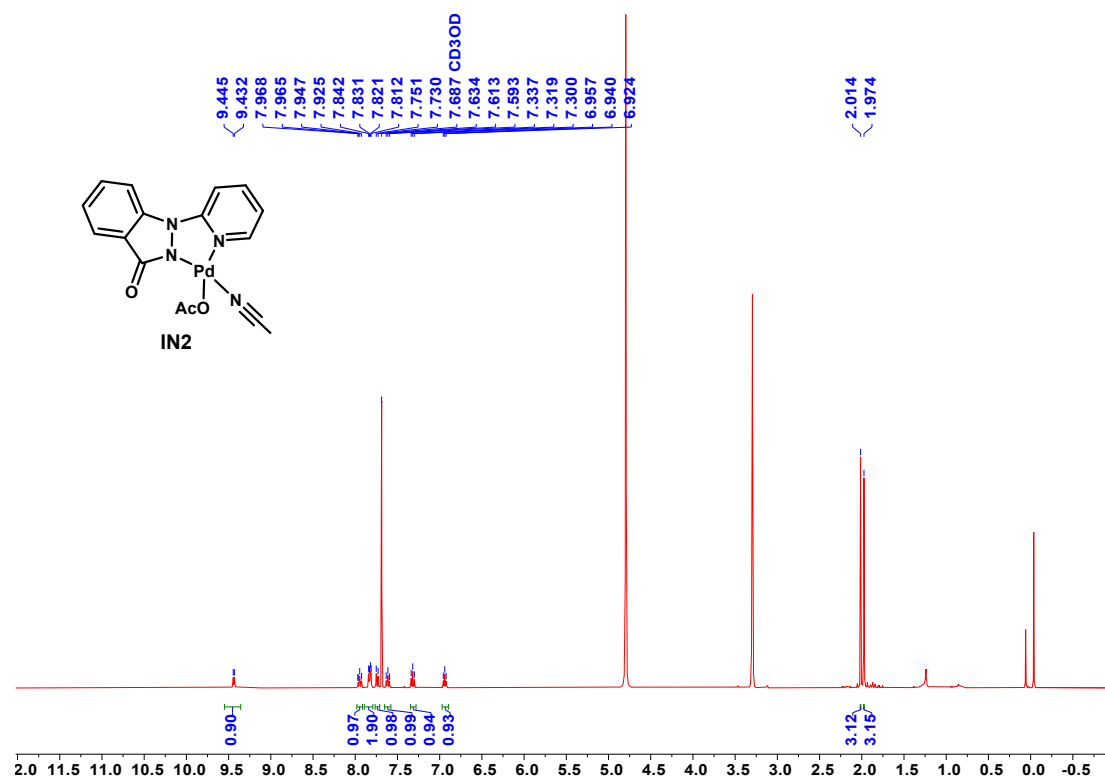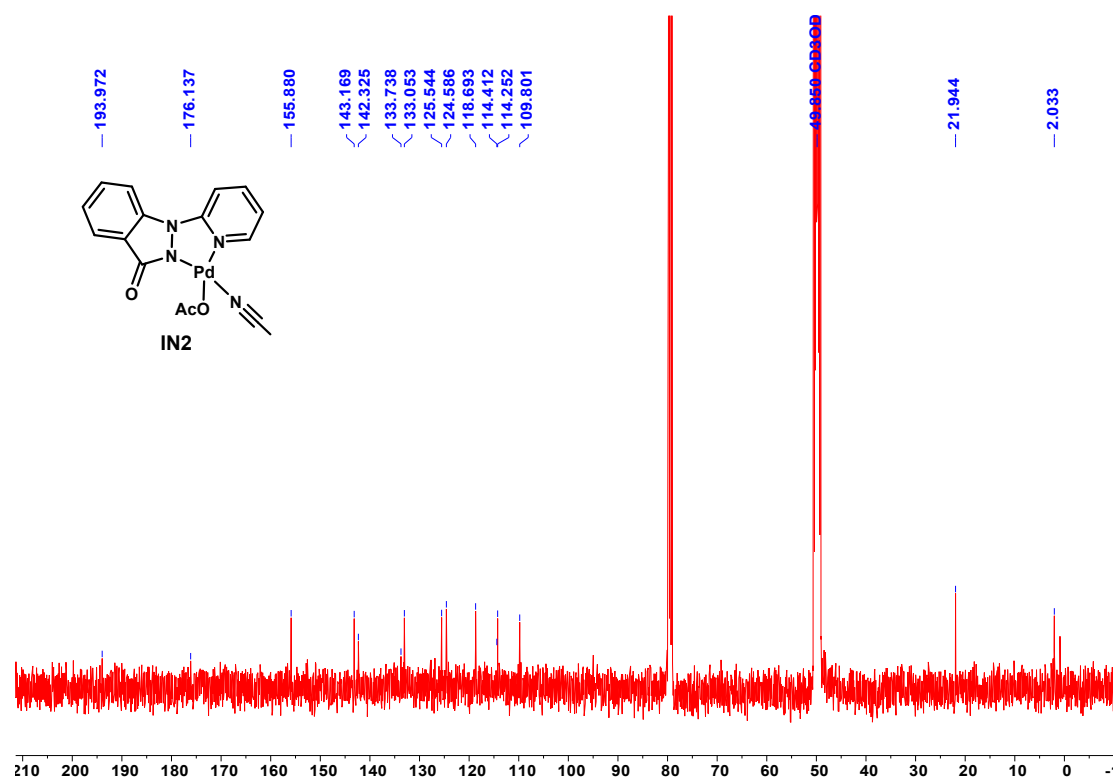

Supplement: d4ra07296k1.pdf [file d4ra07296k1.pdf]
